# Supplementary material for: Chronic lung diseases are associated with gene expression programs favoring SARS-CoV-2 entry and severity
Source: Research Square preprint supplement (doi:10.21203/rs.3.rs-119865/v1), 2020-12-15
Supplement: Supplementary file 3 [file ca3d5e9346cd4d93f1fcb9da.xlsx]

## Sheet: Fig1B_ACE2_SPcells
	CellType	term	group1	group2	estimate	conf.low	conf.high	p.adj	p.adj.signif
1	AT2	Diagnosis	Control	COPD	0.657086	-1.09905	2.41322	0.766	ns
2	AT2	Diagnosis	Control	IPF	-0.310294	-1.49369	0.873106	0.904	ns
3	AT2	Diagnosis	Control	Other-ILD	-0.206255	-1.72361	1.3111	0.985	ns
4	AT2	Diagnosis	COPD	IPF	-0.967379	-2.60864	0.673881	0.422	ns
5	AT2	Diagnosis	COPD	Other-ILD	-0.863341	-2.75956	1.03288	0.639	ns
6	AT2	Diagnosis	IPF	Other-ILD	0.104039	-1.27874	1.48681	0.997	ns
7	Ciliated Cells	Diagnosis	Control	COPD	0.646965	-0.537391	1.83132	0.49	ns
8	Ciliated Cells	Diagnosis	Control	IPF	-0.423667	-1.20208	0.354742	0.493	ns
9	Ciliated Cells	Diagnosis	Control	Other-ILD	-0.302012	-1.294	0.689971	0.859	ns
10	Ciliated Cells	Diagnosis	COPD	IPF	-1.07063	-2.17824	0.0369729	0.0622	ns
11	Ciliated Cells	Diagnosis	COPD	Other-ILD	-0.948977	-2.21582	0.317869	0.214	ns
12	Ciliated Cells	Diagnosis	IPF	Other-ILD	0.121654	-0.7773	1.02061	0.985	ns
13	Differentiating Ciliated Cells	Diagnosis	Control	COPD	-2.22045e-16	-11.5818	11.5818	1	ns
14	Differentiating Ciliated Cells	Diagnosis	Control	IPF	1.66667	-4.33744	7.67078	0.882	ns
15	Differentiating Ciliated Cells	Diagnosis	Control	Other-ILD	0.649351	-6.75837	8.05707	0.996	ns
16	Differentiating Ciliated Cells	Diagnosis	COPD	IPF	1.66667	-9.28254	12.6159	0.978	ns
17	Differentiating Ciliated Cells	Diagnosis	COPD	Other-ILD	0.649351	-11.1282	12.4269	0.999	ns
18	Differentiating Ciliated Cells	Diagnosis	IPF	Other-ILD	-1.01732	-7.39087	5.35624	0.974	ns
19	MUC5AC+	Diagnosis	Control	COPD	-2.929	-11.5977	5.73969	0.816	ns
20	MUC5AC+	Diagnosis	Control	IPF	-2.4562	-8.07984	3.16743	0.668	ns
21	MUC5AC+	Diagnosis	Control	Other-ILD	-3.57295	-10.5945	3.44861	0.55	ns
22	MUC5AC+	Diagnosis	COPD	IPF	0.472795	-7.51662	8.46221	0.999	ns
23	MUC5AC+	Diagnosis	COPD	Other-ILD	-0.643951	-9.67212	8.38422	0.998	ns
24	MUC5AC+	Diagnosis	IPF	Other-ILD	-1.11675	-7.28009	5.0466	0.965	ns
25	MUC5B+	Diagnosis	Control	COPD	-0.135919	-2.79361	2.52177	0.999	ns
26	MUC5B+	Diagnosis	Control	IPF	-0.492306	-2.26186	1.27724	0.888	ns
27	MUC5B+	Diagnosis	Control	Other-ILD	-0.815395	-3.05085	1.42006	0.78	ns
28	MUC5B+	Diagnosis	COPD	IPF	-0.356387	-2.81689	2.10411	0.982	ns
29	MUC5B+	Diagnosis	COPD	Other-ILD	-0.679476	-3.49372	2.13477	0.923	ns
30	MUC5B+	Diagnosis	IPF	Other-ILD	-0.323089	-2.32008	1.6739	0.975	ns
31	Pericytes	Diagnosis	Control	COPD	-0.615944	-6.37025	5.13836	0.992	ns
32	Pericytes	Diagnosis	Control	IPF	0.129454	-4.0032	4.26211	1	ns
33	Pericytes	Diagnosis	Control	Other-ILD	0.609146	-4.28068	5.49897	0.988	ns
34	Pericytes	Diagnosis	COPD	IPF	0.745398	-4.33324	5.82404	0.981	ns
35	Pericytes	Diagnosis	COPD	Other-ILD	1.22509	-4.48666	6.93684	0.944	ns
36	Pericytes	Diagnosis	IPF	Other-ILD	0.479692	-3.5935	4.55288	0.99	ns
37	SCGB3A2+	Diagnosis	Control	COPD	-0.264324	-2.30263	1.77398	0.987	ns
38	SCGB3A2+	Diagnosis	Control	IPF	0.979023	-0.389557	2.3476	0.251	ns
39	SCGB3A2+	Diagnosis	Control	Other-ILD	1.53449	-0.171861	3.24085	0.0945	ns
40	SCGB3A2+	Diagnosis	COPD	IPF	1.24335	-0.63261	3.1193	0.316	ns
41	SCGB3A2+	Diagnosis	COPD	Other-ILD	1.79882	-0.336095	3.93373	0.131	ns
42	SCGB3A2+	Diagnosis	IPF	Other-ILD	0.555471	-0.953225	2.06417	0.774	ns
43	SCGB3A2+/SCGB1A1+	Diagnosis	Control	COPD	-1.57083	-5.6139	2.47223	0.744	ns
44	SCGB3A2+/SCGB1A1+	Diagnosis	Control	IPF	-0.587301	-3.38513	2.21052	0.948	ns
45	SCGB3A2+/SCGB1A1+	Diagnosis	Control	Other-ILD	-1.41255	-4.94374	2.11865	0.727	ns
46	SCGB3A2+/SCGB1A1+	Diagnosis	COPD	IPF	0.983533	-2.74233	4.70939	0.902	ns
47	SCGB3A2+/SCGB1A1+	Diagnosis	COPD	Other-ILD	0.158288	-4.14561	4.46218	1	ns
48	SCGB3A2+/SCGB1A1+	Diagnosis	IPF	Other-ILD	-0.825245	-3.98831	2.33782	0.905	ns

## Sheet: Fig1C_TMPRSS2_SPcells
	CellType	term	group1	group2	estimate	conf.low	conf.high	p.adj	p.adj.signif
1	AT1	Diagnosis	Control	COPD	12.2509	-7.01364	31.5154	0.353	ns
2	AT1	Diagnosis	Control	IPF	15.5777	-1.73003	32.8855	0.094	ns
3	AT1	Diagnosis	Control	Other-ILD	17.4052	-3.78249	38.5929	0.147	ns
4	AT1	Diagnosis	COPD	IPF	3.32688	-17.1046	23.7583	0.974	ns
5	AT1	Diagnosis	COPD	Other-ILD	5.15433	-18.6533	28.962	0.943	ns
6	AT1	Diagnosis	IPF	Other-ILD	1.82745	-20.4266	24.0815	0.997	ns
7	AT2	Diagnosis	Control	COPD	6.90147	-3.6553	17.4583	0.33	ns
8	AT2	Diagnosis	Control	IPF	-3.87328	-11.4754	3.72889	0.552	ns
9	AT2	Diagnosis	Control	Other-ILD	2.68431	-7.64365	13.0123	0.907	ns
10	AT2	Diagnosis	COPD	IPF	-10.7748	-20.9754	-0.574093	0.0339	*
11	AT2	Diagnosis	COPD	Other-ILD	-4.21717	-16.5835	8.1492	0.814	ns
12	AT2	Diagnosis	IPF	Other-ILD	6.55758	-3.40607	16.5212	0.324	ns
13	Basal	Diagnosis	Control	COPD	7.43116	-2.77331	17.6356	0.237	ns
14	Basal	Diagnosis	Control	IPF	1.20948	-6.31633	8.73528	0.976	ns
15	Basal	Diagnosis	Control	Other-ILD	0.874534	-9.01383	10.7629	0.996	ns
16	Basal	Diagnosis	COPD	IPF	-6.22168	-15.6027	3.15928	0.317	ns
17	Basal	Diagnosis	COPD	Other-ILD	-6.55663	-17.9208	4.80755	0.443	ns
18	Basal	Diagnosis	IPF	Other-ILD	-0.334944	-9.37105	8.70116	1	ns
19	Ciliated Cells	Diagnosis	Control	COPD	-0.966205	-7.35095	5.41854	0.98	ns
20	Ciliated Cells	Diagnosis	Control	IPF	4.55303	-0.0561321	9.1622	0.0542	ns
21	Ciliated Cells	Diagnosis	Control	Other-ILD	1.3628	-4.88893	7.61454	0.943	ns
22	Ciliated Cells	Diagnosis	COPD	IPF	5.51924	-0.614814	11.6533	0.0946	ns
23	Ciliated Cells	Diagnosis	COPD	Other-ILD	2.32901	-5.11857	9.77658	0.85	ns
24	Ciliated Cells	Diagnosis	IPF	Other-ILD	-3.19023	-9.18572	2.80525	0.515	ns
25	Differentiating Ciliated Cells	Diagnosis	Control	COPD	25.051	-32.149	82.2511	0.655	ns
26	Differentiating Ciliated Cells	Diagnosis	Control	IPF	11.0542	-21.1255	43.2339	0.801	ns
27	Differentiating Ciliated Cells	Diagnosis	Control	Other-ILD	5.72562	-33.9648	45.4161	0.981	ns
28	Differentiating Ciliated Cells	Diagnosis	COPD	IPF	-13.9969	-67.4124	39.4187	0.899	ns
29	Differentiating Ciliated Cells	Diagnosis	COPD	Other-ILD	-19.3254	-77.5751	38.9243	0.817	ns
30	Differentiating Ciliated Cells	Diagnosis	IPF	Other-ILD	-5.32854	-39.339	28.6819	0.976	ns
31	Ionocytes	Diagnosis	Control	COPD	50	-73.0751	173.075	0.681	ns
32	Ionocytes	Diagnosis	Control	IPF	-30.098	-91.2725	31.0765	0.537	ns
33	Ionocytes	Diagnosis	Control	Other-ILD	-22.2222	-93.2797	48.8352	0.824	ns
34	Ionocytes	Diagnosis	COPD	IPF	-80.098	-193.371	33.1751	0.234	ns
35	Ionocytes	Diagnosis	COPD	Other-ILD	-72.2222	-191.124	46.6796	0.358	ns
36	Ionocytes	Diagnosis	IPF	Other-ILD	7.87582	-44.3974	60.149	0.975	ns
37	KRT5-/KRT17+	Diagnosis	Control	COPD	22.6775	-7.95834	53.3134	0.222	ns
38	KRT5-/KRT17+	Diagnosis	Control	IPF	17.0355	-5.49733	39.5683	0.206	ns
39	KRT5-/KRT17+	Diagnosis	Control	Other-ILD	26.3511	-0.209179	52.9115	0.0527	ns
40	KRT5-/KRT17+	Diagnosis	COPD	IPF	-5.64205	-30.5046	19.2205	0.935	ns
41	KRT5-/KRT17+	Diagnosis	COPD	Other-ILD	3.67362	-24.8898	32.237	0.987	ns
42	KRT5-/KRT17+	Diagnosis	IPF	Other-ILD	9.31567	-10.3068	28.9381	0.606	ns
43	MUC5AC+	Diagnosis	Control	COPD	-0.655889	-17.7963	16.4845	1	ns
44	MUC5AC+	Diagnosis	Control	IPF	-9.28165	-21.6388	3.0755	0.212	ns
45	MUC5AC+	Diagnosis	Control	Other-ILD	-3.69336	-19.6978	12.311	0.933	ns
46	MUC5AC+	Diagnosis	COPD	IPF	-8.62576	-24.3733	7.12173	0.489	ns
47	MUC5AC+	Diagnosis	COPD	Other-ILD	-3.03747	-21.7838	15.7089	0.975	ns
48	MUC5AC+	Diagnosis	IPF	Other-ILD	5.58829	-8.9145	20.0911	0.75	ns
49	MUC5B+	Diagnosis	Control	COPD	8.29063	-2.85887	19.4401	0.221	ns
50	MUC5B+	Diagnosis	Control	IPF	4.92554	-3.31042	13.1615	0.411	ns
51	MUC5B+	Diagnosis	Control	Other-ILD	-2.06254	-12.9883	8.86323	0.962	ns
52	MUC5B+	Diagnosis	COPD	IPF	-3.36509	-13.6852	6.95507	0.833	ns
53	MUC5B+	Diagnosis	COPD	Other-ILD	-10.3532	-22.9249	2.2185	0.146	ns
54	MUC5B+	Diagnosis	IPF	Other-ILD	-6.98809	-17.0661	3.08995	0.278	ns
55	PNECs	Diagnosis	Control	COPD	-2.9533	-27.336	21.4294	0.988	ns
56	PNECs	Diagnosis	Control	IPF	12.8205	-10.0232	35.6642	0.451	ns
57	PNECs	Diagnosis	Control	Other-ILD	-3.84615	-41.183	33.4907	0.993	ns
58	PNECs	Diagnosis	COPD	IPF	15.7738	-5.68153	37.2291	0.22	ns
59	PNECs	Diagnosis	COPD	Other-ILD	-0.892857	-37.3968	35.6111	1	ns
60	PNECs	Diagnosis	IPF	Other-ILD	-16.6667	-52.1611	18.8278	0.6	ns
61	SCGB3A2+	Diagnosis	Control	COPD	1.84996	-13.4168	17.1168	0.989	ns
62	SCGB3A2+	Diagnosis	Control	IPF	4.13523	-7.04432	15.3148	0.773	ns
63	SCGB3A2+	Diagnosis	Control	Other-ILD	2.06607	-12.5508	16.6829	0.983	ns
64	SCGB3A2+	Diagnosis	COPD	IPF	2.28528	-11.9511	16.5216	0.976	ns
65	SCGB3A2+	Diagnosis	COPD	Other-ILD	0.216108	-16.8527	17.2849	1	ns
66	SCGB3A2+	Diagnosis	IPF	Other-ILD	-2.06917	-15.6062	11.4679	0.979	ns
67	SCGB3A2+/SCGB1A1+	Diagnosis	Control	COPD	18.1833	1.0323	35.3343	0.033	*
68	SCGB3A2+/SCGB1A1+	Diagnosis	Control	IPF	16.8644	3.89279	29.836	0.005	**
69	SCGB3A2+/SCGB1A1+	Diagnosis	Control	Other-ILD	10.3622	-6.78876	27.5132	0.401	ns
70	SCGB3A2+/SCGB1A1+	Diagnosis	COPD	IPF	-1.31889	-17.1867	14.5489	0.996	ns
71	SCGB3A2+/SCGB1A1+	Diagnosis	COPD	Other-ILD	-7.82106	-27.2551	11.613	0.724	ns
72	SCGB3A2+/SCGB1A1+	Diagnosis	IPF	Other-ILD	-6.50217	-22.37	9.36566	0.713	ns
73	Transitional AT2	Diagnosis	Control	COPD	10.1759	-2.88839	23.2402	0.185	ns
74	Transitional AT2	Diagnosis	Control	IPF	9.90385	0.39683	19.4109	0.0376	*
75	Transitional AT2	Diagnosis	Control	Other-ILD	14.3885	1.32419	27.4528	0.0245	*
76	Transitional AT2	Diagnosis	COPD	IPF	-0.272049	-12.8939	12.3498	1	ns
77	Transitional AT2	Diagnosis	COPD	Other-ILD	4.21259	-11.2665	19.6917	0.895	ns
78	Transitional AT2	Diagnosis	IPF	Other-ILD	4.48464	-8.13718	17.1064	0.794	ns

## Sheet: Fig1E,F_FigS3_DPcells
CellType	geneid	term	group1	group2	estimate	conf.low	conf.high	p.adj	p.adj.signif
Arterial	ACE2+/TMPRSS2+	Diagnosis	Control	COPD	-1.47059	-5.32544	2.38426	0.753	ns
Arterial	ACE2+/TMPRSS2+	Diagnosis	Control	IPF	-1.47059	-4.20362	1.26244	0.5	ns
Arterial	ACE2+/TMPRSS2+	Diagnosis	Control	Other-ILD	-1.47059	-4.83975	1.89858	0.667	ns
Arterial	ACE2+/TMPRSS2+	Diagnosis	COPD	IPF	3.0354e-16	-3.69609	3.69609	1	ns
Arterial	ACE2+/TMPRSS2+	Diagnosis	COPD	Other-ILD	0	-4.18842	4.18842	1	ns
Arterial	ACE2+/TMPRSS2+	Diagnosis	IPF	Other-ILD	-3.0354e-16	-3.18629	3.18629	1	ns
Arterial	BSG+/TMPRSS2+	Diagnosis	Control	COPD	0.560847	-4.00801	5.12971	0.989	ns
Arterial	BSG+/TMPRSS2+	Diagnosis	Control	IPF	1.62217	-1.57542	4.81976	0.555	ns
Arterial	BSG+/TMPRSS2+	Diagnosis	Control	Other-ILD	-0.10582	-4.34635	4.13471	1	ns
Arterial	BSG+/TMPRSS2+	Diagnosis	COPD	IPF	1.06132	-3.32485	5.4475	0.923	ns
Arterial	BSG+/TMPRSS2+	Diagnosis	COPD	Other-ILD	-0.666667	-5.86244	4.5291	0.987	ns
Arterial	BSG+/TMPRSS2+	Diagnosis	IPF	Other-ILD	-1.72799	-5.77103	2.31504	0.686	ns
Arterial	NRP1+/TMPRSS2+	Diagnosis	Control	COPD	0.111111	-1.39723	1.61945	0.998	ns
Arterial	NRP1+/TMPRSS2+	Diagnosis	Control	IPF	0.392157	-0.692902	1.47722	0.785	ns
Arterial	NRP1+/TMPRSS2+	Diagnosis	Control	Other-ILD	1.85037e-17	-1.40502	1.40502	1	ns
Arterial	NRP1+/TMPRSS2+	Diagnosis	COPD	IPF	0.281046	-1.13758	1.69968	0.956	ns
Arterial	NRP1+/TMPRSS2+	Diagnosis	COPD	Other-ILD	-0.111111	-1.78719	1.56497	0.998	ns
Arterial	NRP1+/TMPRSS2+	Diagnosis	IPF	Other-ILD	-0.392157	-1.70041	0.916094	0.865	ns
AT1	ACE2+/CTSL+	Diagnosis	Control	COPD	3.48637e-17	-0.393691	0.393691	1	ns
AT1	ACE2+/CTSL+	Diagnosis	Control	IPF	0.189753	-0.159431	0.538938	0.491	ns
AT1	ACE2+/CTSL+	Diagnosis	Control	Other-ILD	4.18026e-17	-0.423213	0.423213	1	ns
AT1	ACE2+/CTSL+	Diagnosis	COPD	IPF	0.189753	-0.224888	0.604394	0.632	ns
AT1	ACE2+/CTSL+	Diagnosis	COPD	Other-ILD	6.93889e-18	-0.478651	0.478651	1	ns
AT1	ACE2+/CTSL+	Diagnosis	IPF	Other-ILD	-0.189753	-0.632522	0.253015	0.679	ns
AT1	BSG+/CTSL+	Diagnosis	Control	COPD	-9.58985	-22.4682	3.28844	0.218	ns
AT1	BSG+/CTSL+	Diagnosis	Control	IPF	3.25737	-8.30453	14.8193	0.884	ns
AT1	BSG+/CTSL+	Diagnosis	Control	Other-ILD	0.356432	-13.8149	14.5278	1	ns
AT1	BSG+/CTSL+	Diagnosis	COPD	IPF	12.8472	-0.852246	26.5467	0.0746	ns
AT1	BSG+/CTSL+	Diagnosis	COPD	Other-ILD	9.94629	-6.01693	25.9095	0.371	ns
AT1	BSG+/CTSL+	Diagnosis	IPF	Other-ILD	-2.90093	-17.8224	12.0206	0.958	ns
AT1	HSPA5+/CTSL+	Diagnosis	Control	COPD	-5.82364	-17.8847	6.23743	0.593	ns
AT1	HSPA5+/CTSL+	Diagnosis	Control	IPF	2.05824	-8.76997	12.8865	0.96	ns
AT1	HSPA5+/CTSL+	Diagnosis	Control	Other-ILD	5.43207	-7.83997	18.7041	0.712	ns
AT1	HSPA5+/CTSL+	Diagnosis	COPD	IPF	7.88188	-4.94825	20.712	0.384	ns
AT1	HSPA5+/CTSL+	Diagnosis	COPD	Other-ILD	11.2557	-3.69452	26.2059	0.209	ns
AT1	HSPA5+/CTSL+	Diagnosis	IPF	Other-ILD	3.37382	-10.6008	17.3484	0.923	ns
AT1	NRP1+/CTSL+	Diagnosis	Control	COPD	0.783542	-0.189964	1.75705	0.161	ns
AT1	NRP1+/CTSL+	Diagnosis	Control	IPF	3.84801e-18	-0.873996	0.873996	1	ns
AT1	NRP1+/CTSL+	Diagnosis	Control	Other-ILD	0.684732	-0.386518	1.75598	0.348	ns
AT1	NRP1+/CTSL+	Diagnosis	COPD	IPF	-0.783542	-1.81912	0.252039	0.206	ns
AT1	NRP1+/CTSL+	Diagnosis	COPD	Other-ILD	-0.09881	-1.30551	1.10789	0.997	ns
AT1	NRP1+/CTSL+	Diagnosis	IPF	Other-ILD	0.684732	-0.443226	1.81269	0.395	ns
AT1	ACE2+/FURIN+	Diagnosis	Control	COPD	-0.165292	-1.30861	0.978029	0.981	ns
AT1	ACE2+/FURIN+	Diagnosis	Control	IPF	0.114906	-0.950338	1.18015	0.992	ns
AT1	ACE2+/FURIN+	Diagnosis	Control	Other-ILD	0.487455	-0.680732	1.65564	0.693	ns
AT1	ACE2+/FURIN+	Diagnosis	COPD	IPF	0.280198	-0.965568	1.52596	0.935	ns
AT1	ACE2+/FURIN+	Diagnosis	COPD	Other-ILD	0.652747	-0.682112	1.98761	0.576	ns
AT1	ACE2+/FURIN+	Diagnosis	IPF	Other-ILD	0.372549	-0.896077	1.64117	0.867	ns
AT1	BSG+/FURIN+	Diagnosis	Control	COPD	-2.8277	-12.3674	6.71202	0.868	ns
AT1	BSG+/FURIN+	Diagnosis	Control	IPF	0.995881	-7.56871	9.56047	0.99	ns
AT1	BSG+/FURIN+	Diagnosis	Control	Other-ILD	1.00341	-9.49414	11.501	0.995	ns
AT1	BSG+/FURIN+	Diagnosis	COPD	IPF	3.82358	-6.32443	13.9716	0.761	ns
AT1	BSG+/FURIN+	Diagnosis	COPD	Other-ILD	3.83111	-7.9938	15.656	0.834	ns
AT1	BSG+/FURIN+	Diagnosis	IPF	Other-ILD	0.00752632	-11.0457	11.0608	1	ns
AT1	HSPA5+/FURIN+	Diagnosis	Control	COPD	-0.731706	-10.8082	9.34479	0.998	ns
AT1	HSPA5+/FURIN+	Diagnosis	Control	IPF	5.32018	-3.73283	14.3732	0.424	ns
AT1	HSPA5+/FURIN+	Diagnosis	Control	Other-ILD	10.5618	-0.520624	21.6442	0.0678	ns
AT1	HSPA5+/FURIN+	Diagnosis	COPD	IPF	6.05189	-4.635	16.7388	0.457	ns
AT1	HSPA5+/FURIN+	Diagnosis	COPD	Other-ILD	11.2935	-1.15931	23.7463	0.0902	ns
AT1	HSPA5+/FURIN+	Diagnosis	IPF	Other-ILD	5.24162	-6.39856	16.8818	0.646	ns
AT1	NRP1+/FURIN+	Diagnosis	Control	COPD	-0.118589	-0.588366	0.351189	0.913	ns
AT1	NRP1+/FURIN+	Diagnosis	Control	IPF	-0.118589	-0.540346	0.303169	0.885	ns
AT1	NRP1+/FURIN+	Diagnosis	Control	Other-ILD	0.231062	-0.285883	0.748006	0.652	ns
AT1	NRP1+/FURIN+	Diagnosis	COPD	IPF	4.33258e-17	-0.499732	0.499732	1	ns
AT1	NRP1+/FURIN+	Diagnosis	COPD	Other-ILD	0.34965	-0.232659	0.93196	0.404	ns
AT1	NRP1+/FURIN+	Diagnosis	IPF	Other-ILD	0.34965	-0.19466	0.89396	0.344	ns
AT1	ACE2+/TMPRSS2+	Diagnosis	Control	COPD	0.63892	-1.33999	2.61783	0.832	ns
AT1	ACE2+/TMPRSS2+	Diagnosis	Control	IPF	1.12532	-0.643848	2.89449	0.347	ns
AT1	ACE2+/TMPRSS2+	Diagnosis	Control	Other-ILD	2.14882e-17	-1.94014	1.94014	1	ns
AT1	ACE2+/TMPRSS2+	Diagnosis	COPD	IPF	0.4864	-1.60639	2.57919	0.929	ns
AT1	ACE2+/TMPRSS2+	Diagnosis	COPD	Other-ILD	-0.63892	-2.8781	1.60026	0.877	ns
AT1	ACE2+/TMPRSS2+	Diagnosis	IPF	Other-ILD	-1.12532	-3.18149	0.930848	0.481	ns
AT1	BSG+/TMPRSS2+	Diagnosis	Control	COPD	-1.77588	-18.2551	14.7033	0.992	ns
AT1	BSG+/TMPRSS2+	Diagnosis	Control	IPF	12.0879	-2.70688	26.8826	0.151	ns
AT1	BSG+/TMPRSS2+	Diagnosis	Control	Other-ILD	14.4441	-3.68971	32.5779	0.168	ns
AT1	BSG+/TMPRSS2+	Diagnosis	COPD	IPF	13.8637	-3.66625	31.3937	0.173	ns
AT1	BSG+/TMPRSS2+	Diagnosis	COPD	Other-ILD	16.22	-4.20675	36.6467	0.17	ns
AT1	BSG+/TMPRSS2+	Diagnosis	IPF	Other-ILD	2.35621	-16.7375	21.4499	0.989	ns
AT1	NRP1+/TMPRSS2+	Diagnosis	Control	COPD	0.227181	-0.685987	1.14035	0.916	ns
AT1	NRP1+/TMPRSS2+	Diagnosis	Control	IPF	0.0139319	-0.81597	0.843834	1	ns
AT1	NRP1+/TMPRSS2+	Diagnosis	Control	Other-ILD	0.567085	-0.433815	1.56798	0.456	ns
AT1	NRP1+/TMPRSS2+	Diagnosis	COPD	IPF	-0.213249	-1.1674	0.740901	0.938	ns
AT1	NRP1+/TMPRSS2+	Diagnosis	COPD	Other-ILD	0.339904	-0.766198	1.44601	0.855	ns
AT1	NRP1+/TMPRSS2+	Diagnosis	IPF	Other-ILD	0.553153	-0.485272	1.59158	0.511	ns
AT2	ACE2+/CTSL+	Diagnosis	Control	COPD	0.00227828	-0.739695	0.744252	1	ns
AT2	ACE2+/CTSL+	Diagnosis	Control	IPF	0.176968	-0.349868	0.703804	0.819	ns
AT2	ACE2+/CTSL+	Diagnosis	Control	Other-ILD	0.0912259	-0.627534	0.809986	0.988	ns
AT2	ACE2+/CTSL+	Diagnosis	COPD	IPF	0.174689	-0.537309	0.886688	0.92	ns
AT2	ACE2+/CTSL+	Diagnosis	COPD	Other-ILD	0.0889476	-0.774766	0.952661	0.993	ns
AT2	ACE2+/CTSL+	Diagnosis	IPF	Other-ILD	-0.0857417	-0.773515	0.602032	0.988	ns
AT2	BSG+/CTSL+	Diagnosis	Control	COPD	-1.84589	-8.78027	5.08849	0.901	ns
AT2	BSG+/CTSL+	Diagnosis	Control	IPF	-1.93103	-6.90686	3.0448	0.747	ns
AT2	BSG+/CTSL+	Diagnosis	Control	Other-ILD	-0.934257	-7.71716	5.84865	0.984	ns
AT2	BSG+/CTSL+	Diagnosis	COPD	IPF	-0.0851421	-6.81119	6.64091	1	ns
AT2	BSG+/CTSL+	Diagnosis	COPD	Other-ILD	0.911632	-7.24243	9.06569	0.992	ns
AT2	BSG+/CTSL+	Diagnosis	IPF	Other-ILD	0.996774	-5.573	7.56655	0.979	ns
AT2	HSPA5+/CTSL+	Diagnosis	Control	COPD	-1.83476	-8.07116	4.40163	0.872	ns
AT2	HSPA5+/CTSL+	Diagnosis	Control	IPF	-1.57113	-6.04611	2.90386	0.8	ns
AT2	HSPA5+/CTSL+	Diagnosis	Control	Other-ILD	1.17808	-4.92209	7.27825	0.959	ns
AT2	HSPA5+/CTSL+	Diagnosis	COPD	IPF	0.263638	-5.7854	6.31267	0.999	ns
AT2	HSPA5+/CTSL+	Diagnosis	COPD	Other-ILD	3.01285	-4.32046	10.3462	0.712	ns
AT2	HSPA5+/CTSL+	Diagnosis	IPF	Other-ILD	2.74921	-3.15928	8.6577	0.625	ns
AT2	NRP1+/CTSL+	Diagnosis	Control	COPD	-1.17918	-5.39966	3.0413	0.888	ns
AT2	NRP1+/CTSL+	Diagnosis	Control	IPF	-0.962259	-3.99768	2.07316	0.845	ns
AT2	NRP1+/CTSL+	Diagnosis	Control	Other-ILD	-1.32837	-5.45666	2.79992	0.839	ns
AT2	NRP1+/CTSL+	Diagnosis	COPD	IPF	0.216919	-3.88193	4.31577	0.999	ns
AT2	NRP1+/CTSL+	Diagnosis	COPD	Other-ILD	-0.149188	-5.11201	4.81363	1	ns
AT2	NRP1+/CTSL+	Diagnosis	IPF	Other-ILD	-0.366107	-4.36996	3.63775	0.995	ns
AT2	ACE2+/FURIN+	Diagnosis	Control	COPD	0.588359	-0.449409	1.62613	0.454	ns
AT2	ACE2+/FURIN+	Diagnosis	Control	IPF	0.182917	-0.585845	0.951678	0.925	ns
AT2	ACE2+/FURIN+	Diagnosis	Control	Other-ILD	0.517854	-0.478194	1.5139	0.53	ns
AT2	ACE2+/FURIN+	Diagnosis	COPD	IPF	-0.405442	-1.42591	0.615029	0.729	ns
AT2	ACE2+/FURIN+	Diagnosis	COPD	Other-ILD	-0.0705046	-1.27154	1.13053	0.999	ns
AT2	ACE2+/FURIN+	Diagnosis	IPF	Other-ILD	0.334937	-0.643076	1.31295	0.808	ns
AT2	BSG+/FURIN+	Diagnosis	Control	COPD	-6.50171	-13.8657	0.862232	0.105	ns
AT2	BSG+/FURIN+	Diagnosis	Control	IPF	-3.99057	-9.27464	1.2935	0.209	ns
AT2	BSG+/FURIN+	Diagnosis	Control	Other-ILD	0.186507	-7.01658	7.3896	1	ns
AT2	BSG+/FURIN+	Diagnosis	COPD	IPF	2.51114	-4.63157	9.65385	0.8	ns
AT2	BSG+/FURIN+	Diagnosis	COPD	Other-ILD	6.68822	-1.97097	15.3474	0.191	ns
AT2	BSG+/FURIN+	Diagnosis	IPF	Other-ILD	4.17708	-2.79968	11.1538	0.41	ns
AT2	HSPA5+/FURIN+	Diagnosis	Control	COPD	-3.65348	-10.5445	3.23756	0.518	ns
AT2	HSPA5+/FURIN+	Diagnosis	Control	IPF	-3.13097	-8.0757	1.81376	0.359	ns
AT2	HSPA5+/FURIN+	Diagnosis	Control	Other-ILD	3.2513	-3.48922	9.99182	0.597	ns
AT2	HSPA5+/FURIN+	Diagnosis	COPD	IPF	0.522504	-6.16151	7.20652	0.997	ns
AT2	HSPA5+/FURIN+	Diagnosis	COPD	Other-ILD	6.90478	-1.19832	15.0079	0.125	ns
AT2	HSPA5+/FURIN+	Diagnosis	IPF	Other-ILD	6.38227	-0.146445	12.911	0.058	ns
AT2	NRP1+/FURIN+	Diagnosis	Control	COPD	0.798479	-3.19798	4.79494	0.955	ns
AT2	NRP1+/FURIN+	Diagnosis	Control	IPF	-1.31983	-4.19412	1.55447	0.635	ns
AT2	NRP1+/FURIN+	Diagnosis	Control	Other-ILD	-0.778287	-4.72997	3.1734	0.957	ns
AT2	NRP1+/FURIN+	Diagnosis	COPD	IPF	-2.11831	-5.99959	1.76297	0.493	ns
AT2	NRP1+/FURIN+	Diagnosis	COPD	Other-ILD	-1.57677	-6.31159	3.15806	0.825	ns
AT2	NRP1+/FURIN+	Diagnosis	IPF	Other-ILD	0.54154	-3.29363	4.3767	0.983	ns
AT2	ACE2+/TMPRSS2+	Diagnosis	Control	COPD	0.0919435	-1.66532	1.84921	0.999	ns
AT2	ACE2+/TMPRSS2+	Diagnosis	Control	IPF	-0.0622296	-1.36697	1.24251	0.999	ns
AT2	ACE2+/TMPRSS2+	Diagnosis	Control	Other-ILD	-0.230384	-1.84905	1.38829	0.983	ns
AT2	ACE2+/TMPRSS2+	Diagnosis	COPD	IPF	-0.154173	-1.80695	1.4986	0.995	ns
AT2	ACE2+/TMPRSS2+	Diagnosis	COPD	Other-ILD	-0.322328	-2.23267	1.58802	0.971	ns
AT2	ACE2+/TMPRSS2+	Diagnosis	IPF	Other-ILD	-0.168155	-1.67274	1.33644	0.991	ns
AT2	BSG+/TMPRSS2+	Diagnosis	Control	COPD	-5.1967	-14.1811	3.78767	0.441	ns
AT2	BSG+/TMPRSS2+	Diagnosis	Control	IPF	-4.22332	-10.6816	2.23491	0.33	ns
AT2	BSG+/TMPRSS2+	Diagnosis	Control	Other-ILD	3.25128	-5.53759	12.0401	0.774	ns
AT2	BSG+/TMPRSS2+	Diagnosis	COPD	IPF	0.973376	-7.72467	9.67142	0.992	ns
AT2	BSG+/TMPRSS2+	Diagnosis	COPD	Other-ILD	8.44798	-2.09675	18.9927	0.165	ns
AT2	BSG+/TMPRSS2+	Diagnosis	IPF	Other-ILD	7.4746	-1.02135	15.9706	0.106	ns
AT2	NRP1+/TMPRSS2+	Diagnosis	Control	COPD	-2.23084	-6.24296	1.78129	0.476	ns
AT2	NRP1+/TMPRSS2+	Diagnosis	Control	IPF	-1.64029	-4.61796	1.33738	0.484	ns
AT2	NRP1+/TMPRSS2+	Diagnosis	Control	Other-ILD	-2.11925	-6.04904	1.81055	0.503	ns
AT2	NRP1+/TMPRSS2+	Diagnosis	COPD	IPF	0.590546	-3.19712	4.37821	0.978	ns
AT2	NRP1+/TMPRSS2+	Diagnosis	COPD	Other-ILD	0.111589	-4.46259	4.68577	1	ns
AT2	NRP1+/TMPRSS2+	Diagnosis	IPF	Other-ILD	-0.478957	-4.1793	3.22139	0.987	ns
B Cells	ACE2+/CTSL+	Diagnosis	Control	COPD	-0.097561	-0.332269	0.137147	0.702	ns
B Cells	ACE2+/CTSL+	Diagnosis	Control	IPF	-0.097561	-0.272524	0.0774022	0.471	ns
B Cells	ACE2+/CTSL+	Diagnosis	Control	Other-ILD	-0.097561	-0.355383	0.160261	0.759	ns
B Cells	ACE2+/CTSL+	Diagnosis	COPD	IPF	-3.72423e-17	-0.21996	0.21996	1	ns
B Cells	ACE2+/CTSL+	Diagnosis	COPD	Other-ILD	-3.81639e-17	-0.290245	0.290245	1	ns
B Cells	ACE2+/CTSL+	Diagnosis	IPF	Other-ILD	-9.21572e-19	-0.244472	0.244472	1	ns
B Cells	BSG+/CTSL+	Diagnosis	Control	COPD	-2.41976	-9.99356	5.15404	0.841	ns
B Cells	BSG+/CTSL+	Diagnosis	Control	IPF	1.92424	-3.78334	7.63181	0.819	ns
B Cells	BSG+/CTSL+	Diagnosis	Control	Other-ILD	5.68585	-2.85357	14.2253	0.313	ns
B Cells	BSG+/CTSL+	Diagnosis	COPD	IPF	4.344	-2.81712	11.5051	0.397	ns
B Cells	BSG+/CTSL+	Diagnosis	COPD	Other-ILD	8.10561	-1.46658	17.6778	0.128	ns
B Cells	BSG+/CTSL+	Diagnosis	IPF	Other-ILD	3.76162	-4.41401	11.9372	0.633	ns
B Cells	HSPA5+/CTSL+	Diagnosis	Control	COPD	-2.73733	-10.4021	4.92746	0.791	ns
B Cells	HSPA5+/CTSL+	Diagnosis	Control	IPF	2.29258	-3.48356	8.06872	0.733	ns
B Cells	HSPA5+/CTSL+	Diagnosis	Control	Other-ILD	9.42228	0.780273	18.0643	0.0266	*
B Cells	HSPA5+/CTSL+	Diagnosis	COPD	IPF	5.02991	-2.21723	12.277	0.277	ns
B Cells	HSPA5+/CTSL+	Diagnosis	COPD	Other-ILD	12.1596	2.47242	21.8468	0.0073	**
B Cells	HSPA5+/CTSL+	Diagnosis	IPF	Other-ILD	7.1297	-1.14414	15.4035	0.118	ns
B Cells	NRP1+/CTSL+	Diagnosis	Control	COPD	-0.595651	-1.92858	0.737281	0.654	ns
B Cells	NRP1+/CTSL+	Diagnosis	Control	IPF	-0.583831	-1.58832	0.42066	0.436	ns
B Cells	NRP1+/CTSL+	Diagnosis	Control	Other-ILD	-0.336214	-1.83909	1.16666	0.938	ns
B Cells	NRP1+/CTSL+	Diagnosis	COPD	IPF	0.0118208	-1.24848	1.27212	1	ns
B Cells	NRP1+/CTSL+	Diagnosis	COPD	Other-ILD	0.259437	-1.4252	1.94407	0.978	ns
B Cells	NRP1+/CTSL+	Diagnosis	IPF	Other-ILD	0.247616	-1.19123	1.68646	0.97	ns
B Cells	ACE2+/FURIN+	Diagnosis	Control	COPD	0.0168919	-0.00559491	0.0393787	0.208	ns
B Cells	ACE2+/FURIN+	Diagnosis	Control	IPF	-1.19636e-18	-0.0179082	0.0179082	1	ns
B Cells	ACE2+/FURIN+	Diagnosis	Control	Other-ILD	-1.63004e-18	-0.0247846	0.0247846	1	ns
B Cells	ACE2+/FURIN+	Diagnosis	COPD	IPF	-0.0168919	-0.0384971	0.00471327	0.179	ns
B Cells	ACE2+/FURIN+	Diagnosis	COPD	Other-ILD	-0.0168919	-0.0444665	0.0106827	0.382	ns
B Cells	ACE2+/FURIN+	Diagnosis	IPF	Other-ILD	-4.33681e-19	-0.0239876	0.0239876	1	ns
B Cells	BSG+/FURIN+	Diagnosis	Control	COPD	0.420579	-1.54547	2.38662	0.945	ns
B Cells	BSG+/FURIN+	Diagnosis	Control	IPF	0.815298	-0.666302	2.2969	0.485	ns
B Cells	BSG+/FURIN+	Diagnosis	Control	Other-ILD	0.765754	-1.45095	2.98246	0.807	ns
B Cells	BSG+/FURIN+	Diagnosis	COPD	IPF	0.394719	-1.4642	2.25364	0.946	ns
B Cells	BSG+/FURIN+	Diagnosis	COPD	Other-ILD	0.345175	-2.13962	2.82997	0.984	ns
B Cells	BSG+/FURIN+	Diagnosis	IPF	Other-ILD	-0.0495443	-2.17181	2.07273	1	ns
B Cells	HSPA5+/FURIN+	Diagnosis	Control	COPD	0.16745	-1.64498	1.97988	0.995	ns
B Cells	HSPA5+/FURIN+	Diagnosis	Control	IPF	0.614524	-0.754211	1.98326	0.651	ns
B Cells	HSPA5+/FURIN+	Diagnosis	Control	Other-ILD	0.790212	-1.25208	2.8325	0.748	ns
B Cells	HSPA5+/FURIN+	Diagnosis	COPD	IPF	0.447074	-1.26181	2.15595	0.905	ns
B Cells	HSPA5+/FURIN+	Diagnosis	COPD	Other-ILD	0.622762	-1.66148	2.90701	0.894	ns
B Cells	HSPA5+/FURIN+	Diagnosis	IPF	Other-ILD	0.175688	-1.77529	2.12666	0.996	ns
B Cells	NRP1+/FURIN+	Diagnosis	Control	COPD	0.207054	-0.389813	0.803921	0.805	ns
B Cells	NRP1+/FURIN+	Diagnosis	Control	IPF	0.168163	-0.281633	0.617958	0.767	ns
B Cells	NRP1+/FURIN+	Diagnosis	Control	Other-ILD	-0.141486	-0.814451	0.531478	0.948	ns
B Cells	NRP1+/FURIN+	Diagnosis	COPD	IPF	-0.0388913	-0.603236	0.525453	0.998	ns
B Cells	NRP1+/FURIN+	Diagnosis	COPD	Other-ILD	-0.348541	-1.10289	0.405813	0.629	ns
B Cells	NRP1+/FURIN+	Diagnosis	IPF	Other-ILD	-0.309649	-0.953944	0.334645	0.599	ns
B Cells	BSG+/TMPRSS2+	Diagnosis	Control	COPD	0.41706	-0.127773	0.961893	0.198	ns
B Cells	BSG+/TMPRSS2+	Diagnosis	Control	IPF	-0.0999658	-0.51142	0.311488	0.922	ns
B Cells	BSG+/TMPRSS2+	Diagnosis	Control	Other-ILD	-0.134388	-0.748318	0.479542	0.942	ns
B Cells	BSG+/TMPRSS2+	Diagnosis	COPD	IPF	-0.517025	-1.03073	-0.00332038	0.0479	*
B Cells	BSG+/TMPRSS2+	Diagnosis	COPD	Other-ILD	-0.551448	-1.23811	0.135217	0.163	ns
B Cells	BSG+/TMPRSS2+	Diagnosis	IPF	Other-ILD	-0.0344221	-0.620903	0.552059	0.999	ns
B Cells	NRP1+/TMPRSS2+	Diagnosis	Control	COPD	-0.0379425	-0.200637	0.124752	0.931	ns
B Cells	NRP1+/TMPRSS2+	Diagnosis	Control	IPF	-0.0698812	-0.195534	0.0557717	0.475	ns
B Cells	NRP1+/TMPRSS2+	Diagnosis	Control	Other-ILD	-0.0698812	-0.255414	0.115652	0.763	ns
B Cells	NRP1+/TMPRSS2+	Diagnosis	COPD	IPF	-0.0319387	-0.182674	0.118797	0.947	ns
B Cells	NRP1+/TMPRSS2+	Diagnosis	COPD	Other-ILD	-0.0319387	-0.235298	0.17142	0.977	ns
B Cells	NRP1+/TMPRSS2+	Diagnosis	IPF	Other-ILD	1.39585e-17	-0.17514	0.17514	1	ns
Basal	ACE2+/CTSL+	Diagnosis	Control	COPD	2.84495e-17	-0.587796	0.587796	1	ns
Basal	ACE2+/CTSL+	Diagnosis	Control	IPF	0.250607	-0.179537	0.680752	0.432	ns
Basal	ACE2+/CTSL+	Diagnosis	Control	Other-ILD	0.344231	-0.226561	0.915022	0.401	ns
Basal	ACE2+/CTSL+	Diagnosis	COPD	IPF	0.250607	-0.290355	0.791569	0.626	ns
Basal	ACE2+/CTSL+	Diagnosis	COPD	Other-ILD	0.344231	-0.314115	1.00258	0.527	ns
Basal	ACE2+/CTSL+	Diagnosis	IPF	Other-ILD	0.0936233	-0.428812	0.616059	0.966	ns
Basal	BSG+/CTSL+	Diagnosis	Control	COPD	-5.13687	-15.9516	5.6779	0.608	ns
Basal	BSG+/CTSL+	Diagnosis	Control	IPF	-1.76774	-9.72907	6.19359	0.939	ns
Basal	BSG+/CTSL+	Diagnosis	Control	Other-ILD	3.97227	-6.50748	14.452	0.76	ns
Basal	BSG+/CTSL+	Diagnosis	COPD	IPF	3.36913	-6.5612	13.2995	0.816	ns
Basal	BSG+/CTSL+	Diagnosis	COPD	Other-ILD	9.10914	-2.93469	21.153	0.207	ns
Basal	BSG+/CTSL+	Diagnosis	IPF	Other-ILD	5.74001	-3.82438	15.3044	0.407	ns
Basal	HSPA5+/CTSL+	Diagnosis	Control	COPD	-3.82555	-14.6587	7.00763	0.797	ns
Basal	HSPA5+/CTSL+	Diagnosis	Control	IPF	-1.72278	-9.69766	6.25211	0.944	ns
Basal	HSPA5+/CTSL+	Diagnosis	Control	Other-ILD	3.0873	-7.4103	13.5849	0.872	ns
Basal	HSPA5+/CTSL+	Diagnosis	COPD	IPF	2.10277	-7.84447	12.05	0.947	ns
Basal	HSPA5+/CTSL+	Diagnosis	COPD	Other-ILD	6.91285	-5.15149	18.9772	0.449	ns
Basal	HSPA5+/CTSL+	Diagnosis	IPF	Other-ILD	4.81008	-4.7706	14.3908	0.564	ns
Basal	NRP1+/CTSL+	Diagnosis	Control	COPD	0.0368822	-3.51407	3.58784	1	ns
Basal	NRP1+/CTSL+	Diagnosis	Control	IPF	0.443559	-2.17528	3.06239	0.972	ns
Basal	NRP1+/CTSL+	Diagnosis	Control	Other-ILD	-0.568443	-4.0094	2.87252	0.974	ns
Basal	NRP1+/CTSL+	Diagnosis	COPD	IPF	0.406676	-2.85772	3.67107	0.988	ns
Basal	NRP1+/CTSL+	Diagnosis	COPD	Other-ILD	-0.605325	-4.55984	3.34919	0.979	ns
Basal	NRP1+/CTSL+	Diagnosis	IPF	Other-ILD	-1.012	-4.15639	2.13239	0.838	ns
Basal	ACE2+/FURIN+	Diagnosis	Control	COPD	1.63268e-18	-0.534056	0.534056	1	ns
Basal	ACE2+/FURIN+	Diagnosis	Control	IPF	0.0890639	-0.293089	0.471217	0.929	ns
Basal	ACE2+/FURIN+	Diagnosis	Control	Other-ILD	0.377091	-0.113135	0.867316	0.192	ns
Basal	ACE2+/FURIN+	Diagnosis	COPD	IPF	0.0890639	-0.425602	0.60373	0.969	ns
Basal	ACE2+/FURIN+	Diagnosis	COPD	Other-ILD	0.377091	-0.22221	0.976391	0.36	ns
Basal	ACE2+/FURIN+	Diagnosis	IPF	Other-ILD	0.288027	-0.181	0.757054	0.381	ns
Basal	BSG+/FURIN+	Diagnosis	Control	COPD	-1.57931	-9.46187	6.30326	0.954	ns
Basal	BSG+/FURIN+	Diagnosis	Control	IPF	0.73416	-5.06862	6.53694	0.988	ns
Basal	BSG+/FURIN+	Diagnosis	Control	Other-ILD	2.74582	-4.89257	10.3842	0.788	ns
Basal	BSG+/FURIN+	Diagnosis	COPD	IPF	2.31347	-4.92446	9.55139	0.841	ns
Basal	BSG+/FURIN+	Diagnosis	COPD	Other-ILD	4.32513	-4.45327	13.1035	0.579	ns
Basal	BSG+/FURIN+	Diagnosis	IPF	Other-ILD	2.01166	-4.95955	8.98287	0.878	ns
Basal	HSPA5+/FURIN+	Diagnosis	Control	COPD	-3.09733	-10.8378	4.64318	0.728	ns
Basal	HSPA5+/FURIN+	Diagnosis	Control	IPF	0.56307	-5.13514	6.26128	0.994	ns
Basal	HSPA5+/FURIN+	Diagnosis	Control	Other-ILD	4.42686	-3.07387	11.9276	0.422	ns
Basal	HSPA5+/FURIN+	Diagnosis	COPD	IPF	3.6604	-3.44709	10.7679	0.542	ns
Basal	HSPA5+/FURIN+	Diagnosis	COPD	Other-ILD	7.52419	-1.09601	16.1444	0.111	ns
Basal	HSPA5+/FURIN+	Diagnosis	IPF	Other-ILD	3.86379	-2.98179	10.7094	0.463	ns
Basal	NRP1+/FURIN+	Diagnosis	Control	COPD	-0.88508	-3.37936	1.6092	0.795	ns
Basal	NRP1+/FURIN+	Diagnosis	Control	IPF	-0.393234	-2.23277	1.4463	0.945	ns
Basal	NRP1+/FURIN+	Diagnosis	Control	Other-ILD	0.251448	-2.18993	2.69282	0.993	ns
Basal	NRP1+/FURIN+	Diagnosis	COPD	IPF	0.491846	-1.80115	2.78484	0.945	ns
Basal	NRP1+/FURIN+	Diagnosis	COPD	Other-ILD	1.13653	-1.66244	3.9355	0.719	ns
Basal	NRP1+/FURIN+	Diagnosis	IPF	Other-ILD	0.644682	-1.59064	2.88001	0.878	ns
Basal	ACE2+/TMPRSS2+	Diagnosis	Control	COPD	-5.55112e-17	-1.13566	1.13566	1	ns
Basal	ACE2+/TMPRSS2+	Diagnosis	Control	IPF	0.130246	-0.701716	0.962209	0.977	ns
Basal	ACE2+/TMPRSS2+	Diagnosis	Control	Other-ILD	0.649351	-0.361842	1.66054	0.342	ns
Basal	ACE2+/TMPRSS2+	Diagnosis	COPD	IPF	0.130246	-0.909984	1.17048	0.988	ns
Basal	ACE2+/TMPRSS2+	Diagnosis	COPD	Other-ILD	0.649351	-0.539106	1.83781	0.487	ns
Basal	ACE2+/TMPRSS2+	Diagnosis	IPF	Other-ILD	0.519104	-0.383593	1.4218	0.441	ns
Basal	BSG+/TMPRSS2+	Diagnosis	Control	COPD	6.55048	0.263265	12.8377	0.0375	*
Basal	BSG+/TMPRSS2+	Diagnosis	Control	IPF	4.85044	0.222078	9.4788	0.036	*
Basal	BSG+/TMPRSS2+	Diagnosis	Control	Other-ILD	6.13566	0.0431983	12.2281	0.0477	*
Basal	BSG+/TMPRSS2+	Diagnosis	COPD	IPF	-1.70004	-7.47309	4.073	0.871	ns
Basal	BSG+/TMPRSS2+	Diagnosis	COPD	Other-ILD	-0.414825	-7.41657	6.58692	0.999	ns
Basal	BSG+/TMPRSS2+	Diagnosis	IPF	Other-ILD	1.28522	-4.27509	6.84553	0.932	ns
Basal	NRP1+/TMPRSS2+	Diagnosis	Control	COPD	1.00219	-3.13393	5.13832	0.923	ns
Basal	NRP1+/TMPRSS2+	Diagnosis	Control	IPF	-0.00288529	-3.11713	3.11136	1	ns
Basal	NRP1+/TMPRSS2+	Diagnosis	Control	Other-ILD	-1.10042	-5.15252	2.95167	0.896	ns
Basal	NRP1+/TMPRSS2+	Diagnosis	COPD	IPF	-1.00508	-4.73601	2.72586	0.898	ns
Basal	NRP1+/TMPRSS2+	Diagnosis	COPD	Other-ILD	-2.10262	-6.64583	2.4406	0.628	ns
Basal	NRP1+/TMPRSS2+	Diagnosis	IPF	Other-ILD	-1.09754	-4.7351	2.54002	0.863	ns
Bronchial Vessels	BSG+/TMPRSS2+	Diagnosis	Control	COPD	0.277485	-0.804633	1.3596	0.911	ns
Bronchial Vessels	BSG+/TMPRSS2+	Diagnosis	Control	IPF	0.374323	-0.353394	1.10204	0.544	ns
Bronchial Vessels	BSG+/TMPRSS2+	Diagnosis	Control	Other-ILD	0.488804	-0.470074	1.44768	0.551	ns
Bronchial Vessels	BSG+/TMPRSS2+	Diagnosis	COPD	IPF	0.0968378	-0.937093	1.13077	0.995	ns
Bronchial Vessels	BSG+/TMPRSS2+	Diagnosis	COPD	Other-ILD	0.211318	-0.996526	1.41916	0.969	ns
Bronchial Vessels	BSG+/TMPRSS2+	Diagnosis	IPF	Other-ILD	0.114481	-0.789665	1.01863	0.988	ns
Bronchial Vessels	NRP1+/TMPRSS2+	Diagnosis	Control	COPD	-0.330921	-2.8011	2.13925	0.986	ns
Bronchial Vessels	NRP1+/TMPRSS2+	Diagnosis	Control	IPF	0.481756	-1.25677	2.22029	0.89	ns
Bronchial Vessels	NRP1+/TMPRSS2+	Diagnosis	Control	Other-ILD	-0.308183	-2.56313	1.94677	0.985	ns
Bronchial Vessels	NRP1+/TMPRSS2+	Diagnosis	COPD	IPF	0.812677	-1.49181	3.11716	0.798	ns
Bronchial Vessels	NRP1+/TMPRSS2+	Diagnosis	COPD	Other-ILD	0.0227376	-2.69258	2.73806	1	ns
Bronchial Vessels	NRP1+/TMPRSS2+	Diagnosis	IPF	Other-ILD	-0.789939	-2.86206	1.28218	0.757	ns
Capillary	BSG+/TMPRSS2+	Diagnosis	Control	COPD	-0.296954	-4.6376	4.04369	0.998	ns
Capillary	BSG+/TMPRSS2+	Diagnosis	Control	IPF	1.12526	-2.01313	4.26365	0.789	ns
Capillary	BSG+/TMPRSS2+	Diagnosis	Control	Other-ILD	-0.227976	-4.4132	3.95725	0.999	ns
Capillary	BSG+/TMPRSS2+	Diagnosis	COPD	IPF	1.42221	-2.7623	5.60673	0.815	ns
Capillary	BSG+/TMPRSS2+	Diagnosis	COPD	Other-ILD	0.0689778	-4.94867	5.08662	1	ns
Capillary	BSG+/TMPRSS2+	Diagnosis	IPF	Other-ILD	-1.35324	-5.3763	2.66983	0.82	ns
Capillary	NRP1+/TMPRSS2+	Diagnosis	Control	COPD	0.0119218	-4.38635	4.4102	1	ns
Capillary	NRP1+/TMPRSS2+	Diagnosis	Control	IPF	1.2148	-2.0395	4.46911	0.768	ns
Capillary	NRP1+/TMPRSS2+	Diagnosis	Control	Other-ILD	0.191571	-4.10377	4.48692	0.999	ns
Capillary	NRP1+/TMPRSS2+	Diagnosis	COPD	IPF	1.20288	-2.94393	5.34969	0.876	ns
Capillary	NRP1+/TMPRSS2+	Diagnosis	COPD	Other-ILD	0.179649	-4.8259	5.1852	1	ns
Capillary	NRP1+/TMPRSS2+	Diagnosis	IPF	Other-ILD	-1.02323	-5.06071	3.01424	0.913	ns
CD4 T Cells	BSG+/TMPRSS2+	Diagnosis	Control	COPD	-0.0382803	-0.582929	0.506368	0.998	ns
CD4 T Cells	BSG+/TMPRSS2+	Diagnosis	Control	IPF	0.0534763	-0.387365	0.494317	0.989	ns
CD4 T Cells	BSG+/TMPRSS2+	Diagnosis	Control	Other-ILD	-0.132497	-1.72106	1.45606	0.996	ns
CD4 T Cells	BSG+/TMPRSS2+	Diagnosis	COPD	IPF	0.0917566	-0.44208	0.625593	0.97	ns
CD4 T Cells	BSG+/TMPRSS2+	Diagnosis	COPD	Other-ILD	-0.094217	-1.71105	1.52262	0.999	ns
CD4 T Cells	BSG+/TMPRSS2+	Diagnosis	IPF	Other-ILD	-0.185974	-1.77086	1.39891	0.99	ns
CD4 T Cells	NRP1+/TMPRSS2+	Diagnosis	Control	COPD	0.431177	-0.202161	1.06452	0.291	ns
CD4 T Cells	NRP1+/TMPRSS2+	Diagnosis	Control	IPF	0.00894214	-0.512214	0.530099	1	ns
CD4 T Cells	NRP1+/TMPRSS2+	Diagnosis	Control	Other-ILD	1.14106e-17	-1.85792	1.85792	1	ns
CD4 T Cells	NRP1+/TMPRSS2+	Diagnosis	COPD	IPF	-0.422235	-1.03782	0.19335	0.285	ns
CD4 T Cells	NRP1+/TMPRSS2+	Diagnosis	COPD	Other-ILD	-0.431177	-2.31776	1.45541	0.933	ns
CD4 T Cells	NRP1+/TMPRSS2+	Diagnosis	IPF	Other-ILD	-0.00894214	-1.86089	1.843	1	ns
CD8 T Cells	BSG+/TMPRSS2+	Diagnosis	Control	COPD	-0.315835	-1.8589	1.22723	0.952	ns
CD8 T Cells	BSG+/TMPRSS2+	Diagnosis	Control	IPF	0.100415	-1.07068	1.27151	0.996	ns
CD8 T Cells	BSG+/TMPRSS2+	Diagnosis	Control	Other-ILD	-0.369342	-2.14594	1.40725	0.949	ns
CD8 T Cells	BSG+/TMPRSS2+	Diagnosis	COPD	IPF	0.41625	-1.02989	1.86239	0.878	ns
CD8 T Cells	BSG+/TMPRSS2+	Diagnosis	COPD	Other-ILD	-0.053507	-2.0223	1.91529	1	ns
CD8 T Cells	BSG+/TMPRSS2+	Diagnosis	IPF	Other-ILD	-0.469757	-2.16284	1.22333	0.889	ns
cDCs	ACE2+/CTSL+	Diagnosis	Control	COPD	0.0218859	-0.032782	0.0765538	0.727	ns
cDCs	ACE2+/CTSL+	Diagnosis	Control	IPF	-0.000357833	-0.0394755	0.0387598	1	ns
cDCs	ACE2+/CTSL+	Diagnosis	Control	Other-ILD	-0.0110522	-0.0640953	0.041991	0.949	ns
cDCs	ACE2+/CTSL+	Diagnosis	COPD	IPF	-0.0222437	-0.0746057	0.0301182	0.689	ns
cDCs	ACE2+/CTSL+	Diagnosis	COPD	Other-ILD	-0.0329381	-0.0963822	0.0305061	0.534	ns
cDCs	ACE2+/CTSL+	Diagnosis	IPF	Other-ILD	-0.0106943	-0.0613576	0.039969	0.947	ns
cDCs	BSG+/CTSL+	Diagnosis	Control	COPD	-7.08434	-13.0943	-1.07435	0.0135	*
cDCs	BSG+/CTSL+	Diagnosis	Control	IPF	0.3798	-3.9776	4.7372	0.996	ns
cDCs	BSG+/CTSL+	Diagnosis	Control	Other-ILD	1.92518	-4.0219	7.87226	0.837	ns
cDCs	BSG+/CTSL+	Diagnosis	COPD	IPF	7.46414	1.63231	13.296	0.00587	**
cDCs	BSG+/CTSL+	Diagnosis	COPD	Other-ILD	9.00952	1.91085	16.1082	0.00643	**
cDCs	BSG+/CTSL+	Diagnosis	IPF	Other-ILD	1.54538	-4.22161	7.31237	0.9	ns
cDCs	HSPA5+/CTSL+	Diagnosis	Control	COPD	-8.04295	-15.6491	-0.436742	0.0336	*
cDCs	HSPA5+/CTSL+	Diagnosis	Control	IPF	0.312968	-5.20173	5.82767	0.999	ns
cDCs	HSPA5+/CTSL+	Diagnosis	Control	Other-ILD	5.949	-1.57759	13.4756	0.175	ns
cDCs	HSPA5+/CTSL+	Diagnosis	COPD	IPF	8.35591	0.97518	15.7366	0.0194	*
cDCs	HSPA5+/CTSL+	Diagnosis	COPD	Other-ILD	13.9919	5.00791	22.976	0.000434	***
cDCs	HSPA5+/CTSL+	Diagnosis	IPF	Other-ILD	5.63604	-1.66263	12.9347	0.192	ns
cDCs	NRP1+/CTSL+	Diagnosis	Control	COPD	-3.09701	-8.15271	1.95869	0.389	ns
cDCs	NRP1+/CTSL+	Diagnosis	Control	IPF	-0.633917	-4.29943	3.0316	0.97	ns
cDCs	NRP1+/CTSL+	Diagnosis	Control	Other-ILD	-2.58699	-7.58978	2.41579	0.54	ns
cDCs	NRP1+/CTSL+	Diagnosis	COPD	IPF	2.46309	-2.44274	7.36893	0.565	ns
cDCs	NRP1+/CTSL+	Diagnosis	COPD	Other-ILD	0.51002	-5.4615	6.48154	0.996	ns
cDCs	NRP1+/CTSL+	Diagnosis	IPF	Other-ILD	-1.95307	-6.80436	2.89821	0.725	ns
cDCs	ACE2+/FURIN+	Diagnosis	Control	COPD	-0.191804	-0.64261	0.259001	0.685	ns
cDCs	ACE2+/FURIN+	Diagnosis	Control	IPF	-0.174304	-0.507246	0.158637	0.524	ns
cDCs	ACE2+/FURIN+	Diagnosis	Control	Other-ILD	-0.191804	-0.624351	0.240742	0.656	ns
cDCs	ACE2+/FURIN+	Diagnosis	COPD	IPF	0.0174998	-0.427412	0.462412	1	ns
cDCs	ACE2+/FURIN+	Diagnosis	COPD	Other-ILD	4.16334e-17	-0.523634	0.523634	1	ns
cDCs	ACE2+/FURIN+	Diagnosis	IPF	Other-ILD	-0.0174998	-0.443901	0.408901	1	ns
cDCs	BSG+/FURIN+	Diagnosis	Control	COPD	-2.77457	-6.414	0.864854	0.201	ns
cDCs	BSG+/FURIN+	Diagnosis	Control	IPF	-0.200802	-2.83948	2.43788	0.997	ns
cDCs	BSG+/FURIN+	Diagnosis	Control	Other-ILD	1.80305	-1.79828	5.40439	0.567	ns
cDCs	BSG+/FURIN+	Diagnosis	COPD	IPF	2.57377	-0.957773	6.10531	0.237	ns
cDCs	BSG+/FURIN+	Diagnosis	COPD	Other-ILD	4.57762	0.27893	8.87632	0.0319	*
cDCs	BSG+/FURIN+	Diagnosis	IPF	Other-ILD	2.00385	-1.48842	5.49613	0.449	ns
cDCs	HSPA5+/FURIN+	Diagnosis	Control	COPD	0.166135	-4.06101	4.39328	1	ns
cDCs	HSPA5+/FURIN+	Diagnosis	Control	IPF	0.788137	-2.27666	3.85293	0.91	ns
cDCs	HSPA5+/FURIN+	Diagnosis	Control	Other-ILD	3.45216	-0.730746	7.63507	0.145	ns
cDCs	HSPA5+/FURIN+	Diagnosis	COPD	IPF	0.622002	-3.47984	4.72385	0.979	ns
cDCs	HSPA5+/FURIN+	Diagnosis	COPD	Other-ILD	3.28603	-1.70685	8.27891	0.325	ns
cDCs	HSPA5+/FURIN+	Diagnosis	IPF	Other-ILD	2.66402	-1.39221	6.72026	0.326	ns
cDCs	NRP1+/FURIN+	Diagnosis	Control	COPD	0.168713	-1.87329	2.21072	0.997	ns
cDCs	NRP1+/FURIN+	Diagnosis	Control	IPF	-0.371168	-1.83557	1.09323	0.913	ns
cDCs	NRP1+/FURIN+	Diagnosis	Control	Other-ILD	-0.903756	-2.92354	1.11603	0.654	ns
cDCs	NRP1+/FURIN+	Diagnosis	COPD	IPF	-0.539881	-2.52268	1.44292	0.895	ns
cDCs	NRP1+/FURIN+	Diagnosis	COPD	Other-ILD	-1.07247	-3.49457	1.34963	0.662	ns
cDCs	NRP1+/FURIN+	Diagnosis	IPF	Other-ILD	-0.532588	-2.4925	1.42732	0.896	ns
cDCs	BSG+/TMPRSS2+	Diagnosis	Control	COPD	0.129885	-0.237593	0.497364	0.797	ns
cDCs	BSG+/TMPRSS2+	Diagnosis	Control	IPF	0.111229	-0.153207	0.375665	0.697	ns
cDCs	BSG+/TMPRSS2+	Diagnosis	Control	Other-ILD	0.0102454	-0.349488	0.369978	1	ns
cDCs	BSG+/TMPRSS2+	Diagnosis	COPD	IPF	-0.0186565	-0.374181	0.336868	0.999	ns
cDCs	BSG+/TMPRSS2+	Diagnosis	COPD	Other-ILD	-0.11964	-0.550777	0.311497	0.89	ns
cDCs	BSG+/TMPRSS2+	Diagnosis	IPF	Other-ILD	-0.100983	-0.448496	0.24653	0.876	ns
cDCs	NRP1+/TMPRSS2+	Diagnosis	Control	COPD	0.0107426	-0.220777	0.242262	0.999	ns
cDCs	NRP1+/TMPRSS2+	Diagnosis	Control	IPF	0.0150089	-0.158612	0.18863	0.996	ns
cDCs	NRP1+/TMPRSS2+	Diagnosis	Control	Other-ILD	-0.0571194	-0.288639	0.1744	0.919	ns
cDCs	NRP1+/TMPRSS2+	Diagnosis	COPD	IPF	0.00426624	-0.214015	0.222547	1	ns
cDCs	NRP1+/TMPRSS2+	Diagnosis	COPD	Other-ILD	-0.0678621	-0.334515	0.19879	0.912	ns
cDCs	NRP1+/TMPRSS2+	Diagnosis	IPF	Other-ILD	-0.0721283	-0.29041	0.146153	0.828	ns
Ciliated Cells	ACE2+/CTSL+	Diagnosis	Control	COPD	-0.0571011	-0.638878	0.524676	0.994	ns
Ciliated Cells	ACE2+/CTSL+	Diagnosis	Control	IPF	0.0643371	-0.351915	0.480589	0.978	ns
Ciliated Cells	ACE2+/CTSL+	Diagnosis	Control	Other-ILD	0.110867	-0.453722	0.675455	0.957	ns
Ciliated Cells	ACE2+/CTSL+	Diagnosis	COPD	IPF	0.121438	-0.433291	0.676167	0.941	ns
Ciliated Cells	ACE2+/CTSL+	Diagnosis	COPD	Other-ILD	0.167968	-0.505247	0.841182	0.916	ns
Ciliated Cells	ACE2+/CTSL+	Diagnosis	IPF	Other-ILD	0.0465294	-0.490145	0.583203	0.996	ns
Ciliated Cells	BSG+/CTSL+	Diagnosis	Control	COPD	-3.02181	-11.2898	5.24619	0.78	ns
Ciliated Cells	BSG+/CTSL+	Diagnosis	Control	IPF	5.13563	-0.809667	11.0809	0.117	ns
Ciliated Cells	BSG+/CTSL+	Diagnosis	Control	Other-ILD	12.7854	4.69029	20.8804	0.000347	***
Ciliated Cells	BSG+/CTSL+	Diagnosis	COPD	IPF	8.15744	0.207791	16.1071	0.0418	*
Ciliated Cells	BSG+/CTSL+	Diagnosis	COPD	Other-ILD	15.8072	6.14381	25.4705	0.000192	***
Ciliated Cells	BSG+/CTSL+	Diagnosis	IPF	Other-ILD	7.64973	-0.119901	15.4194	0.0554	ns
Ciliated Cells	HSPA5+/CTSL+	Diagnosis	Control	COPD	-5.69281	-13.9374	2.55176	0.282	ns
Ciliated Cells	HSPA5+/CTSL+	Diagnosis	Control	IPF	3.19129	-2.73716	9.11974	0.505	ns
Ciliated Cells	HSPA5+/CTSL+	Diagnosis	Control	Other-ILD	9.68405	1.61192	17.7562	0.0114	*
Ciliated Cells	HSPA5+/CTSL+	Diagnosis	COPD	IPF	8.88411	0.956984	16.8112	0.0211	*
Ciliated Cells	HSPA5+/CTSL+	Diagnosis	COPD	Other-ILD	15.3769	5.74089	25.0128	0.000293	***
Ciliated Cells	HSPA5+/CTSL+	Diagnosis	IPF	Other-ILD	6.49276	-1.25486	14.2404	0.135	ns
Ciliated Cells	NRP1+/CTSL+	Diagnosis	Control	COPD	-0.285884	-1.40384	0.832073	0.911	ns
Ciliated Cells	NRP1+/CTSL+	Diagnosis	Control	IPF	0.0998513	-0.705739	0.905441	0.989	ns
Ciliated Cells	NRP1+/CTSL+	Diagnosis	Control	Other-ILD	-0.876266	-1.97084	0.218308	0.166	ns
Ciliated Cells	NRP1+/CTSL+	Diagnosis	COPD	IPF	0.385735	-0.690445	1.46192	0.79	ns
Ciliated Cells	NRP1+/CTSL+	Diagnosis	COPD	Other-ILD	-0.590382	-1.89701	0.716248	0.647	ns
Ciliated Cells	NRP1+/CTSL+	Diagnosis	IPF	Other-ILD	-0.976117	-2.02799	0.075752	0.0796	ns
Ciliated Cells	ACE2+/FURIN+	Diagnosis	Control	COPD	-0.347123	-1.16758	0.473331	0.688	ns
Ciliated Cells	ACE2+/FURIN+	Diagnosis	Control	IPF	-0.347123	-0.935995	0.24175	0.419	ns
Ciliated Cells	ACE2+/FURIN+	Diagnosis	Control	Other-ILD	-0.347123	-1.11625	0.422001	0.643	ns
Ciliated Cells	ACE2+/FURIN+	Diagnosis	COPD	IPF	4.41005e-17	-0.807927	0.807927	1	ns
Ciliated Cells	ACE2+/FURIN+	Diagnosis	COPD	Other-ILD	-2.77556e-17	-0.947378	0.947378	1	ns
Ciliated Cells	ACE2+/FURIN+	Diagnosis	IPF	Other-ILD	-7.18561e-17	-0.755746	0.755746	1	ns
Ciliated Cells	BSG+/FURIN+	Diagnosis	Control	COPD	-0.524282	-1.30921	0.260646	0.311	ns
Ciliated Cells	BSG+/FURIN+	Diagnosis	Control	IPF	-0.526644	-1.09106	0.0377771	0.0772	ns
Ciliated Cells	BSG+/FURIN+	Diagnosis	Control	Other-ILD	-0.0819627	-0.850473	0.686548	0.993	ns
Ciliated Cells	BSG+/FURIN+	Diagnosis	COPD	IPF	-0.00236153	-0.757066	0.752343	1	ns
Ciliated Cells	BSG+/FURIN+	Diagnosis	COPD	Other-ILD	0.442319	-0.475078	1.35972	0.597	ns
Ciliated Cells	BSG+/FURIN+	Diagnosis	IPF	Other-ILD	0.444681	-0.292934	1.1823	0.404	ns
Ciliated Cells	HSPA5+/FURIN+	Diagnosis	Control	COPD	-0.773822	-1.62925	0.081604	0.0919	ns
Ciliated Cells	HSPA5+/FURIN+	Diagnosis	Control	IPF	-0.588165	-1.20441	0.0280788	0.0674	ns
Ciliated Cells	HSPA5+/FURIN+	Diagnosis	Control	Other-ILD	-0.319536	-1.15714	0.518069	0.757	ns
Ciliated Cells	HSPA5+/FURIN+	Diagnosis	COPD	IPF	0.185658	-0.635211	1.00653	0.936	ns
Ciliated Cells	HSPA5+/FURIN+	Diagnosis	COPD	Other-ILD	0.454286	-0.543538	1.45211	0.641	ns
Ciliated Cells	HSPA5+/FURIN+	Diagnosis	IPF	Other-ILD	0.268628	-0.533652	1.07091	0.822	ns
Ciliated Cells	NRP1+/FURIN+	Diagnosis	Control	COPD	-0.0899145	-0.316133	0.136304	0.733	ns
Ciliated Cells	NRP1+/FURIN+	Diagnosis	Control	IPF	-0.0148345	-0.177845	0.148176	0.995	ns
Ciliated Cells	NRP1+/FURIN+	Diagnosis	Control	Other-ILD	0.0126203	-0.211173	0.236413	0.999	ns
Ciliated Cells	NRP1+/FURIN+	Diagnosis	COPD	IPF	0.0750799	-0.142685	0.292845	0.809	ns
Ciliated Cells	NRP1+/FURIN+	Diagnosis	COPD	Other-ILD	0.102535	-0.163796	0.368866	0.752	ns
Ciliated Cells	NRP1+/FURIN+	Diagnosis	IPF	Other-ILD	0.0274549	-0.18779	0.242699	0.988	ns
Ciliated Cells	ACE2+/TMPRSS2+	Diagnosis	Control	COPD	0.207477	-0.300741	0.715694	0.712	ns
Ciliated Cells	ACE2+/TMPRSS2+	Diagnosis	Control	IPF	-0.0919923	-0.461712	0.277727	0.916	ns
Ciliated Cells	ACE2+/TMPRSS2+	Diagnosis	Control	Other-ILD	0.083264	-0.375413	0.541941	0.965	ns
Ciliated Cells	ACE2+/TMPRSS2+	Diagnosis	COPD	IPF	-0.299469	-0.778713	0.179775	0.367	ns
Ciliated Cells	ACE2+/TMPRSS2+	Diagnosis	COPD	Other-ILD	-0.124213	-0.675001	0.426575	0.936	ns
Ciliated Cells	ACE2+/TMPRSS2+	Diagnosis	IPF	Other-ILD	0.175256	-0.251094	0.601607	0.708	ns
Ciliated Cells	BSG+/TMPRSS2+	Diagnosis	Control	COPD	-1.58794	-6.68335	3.50747	0.851	ns
Ciliated Cells	BSG+/TMPRSS2+	Diagnosis	Control	IPF	3.60498	-0.0589954	7.26895	0.0557	ns
Ciliated Cells	BSG+/TMPRSS2+	Diagnosis	Control	Other-ILD	3.79116	-1.19767	8.77999	0.204	ns
Ciliated Cells	BSG+/TMPRSS2+	Diagnosis	COPD	IPF	5.19292	0.293705	10.0921	0.033	*
Ciliated Cells	BSG+/TMPRSS2+	Diagnosis	COPD	Other-ILD	5.3791	-0.576238	11.3344	0.0927	ns
Ciliated Cells	BSG+/TMPRSS2+	Diagnosis	IPF	Other-ILD	0.186183	-4.60209	4.97446	1	ns
Ciliated Cells	NRP1+/TMPRSS2+	Diagnosis	Control	COPD	-0.926763	-2.98461	1.13109	0.649	ns
Ciliated Cells	NRP1+/TMPRSS2+	Diagnosis	Control	IPF	-0.646124	-2.1674	0.875149	0.69	ns
Ciliated Cells	NRP1+/TMPRSS2+	Diagnosis	Control	Other-ILD	-1.23987	-3.27671	0.796984	0.395	ns
Ciliated Cells	NRP1+/TMPRSS2+	Diagnosis	COPD	IPF	0.280639	-1.65713	2.21841	0.982	ns
Ciliated Cells	NRP1+/TMPRSS2+	Diagnosis	COPD	Other-ILD	-0.313102	-2.6773	2.0511	0.986	ns
Ciliated Cells	NRP1+/TMPRSS2+	Diagnosis	IPF	Other-ILD	-0.593741	-2.5092	1.32171	0.853	ns
Club Cells	ACE2+/CTSL+	Diagnosis	Control	COPD	-0.430467	-1.68573	0.824795	0.81	ns
Club Cells	ACE2+/CTSL+	Diagnosis	Control	IPF	-0.00385573	-0.919947	0.912235	1	ns
Club Cells	ACE2+/CTSL+	Diagnosis	Control	Other-ILD	-0.0370173	-1.25506	1.18102	1	ns
Club Cells	ACE2+/CTSL+	Diagnosis	COPD	IPF	0.426612	-0.74849	1.60171	0.782	ns
Club Cells	ACE2+/CTSL+	Diagnosis	COPD	Other-ILD	0.39345	-1.02967	1.81657	0.89	ns
Club Cells	ACE2+/CTSL+	Diagnosis	IPF	Other-ILD	-0.0331616	-1.16842	1.10209	1	ns
Club Cells	BSG+/CTSL+	Diagnosis	Control	COPD	-6.59796	-14.022	0.826076	0.101	ns
Club Cells	BSG+/CTSL+	Diagnosis	Control	IPF	-3.37489	-8.80141	2.05164	0.375	ns
Club Cells	BSG+/CTSL+	Diagnosis	Control	Other-ILD	-2.77493	-10.0401	4.49024	0.756	ns
Club Cells	BSG+/CTSL+	Diagnosis	COPD	IPF	3.22307	-3.77726	10.2234	0.633	ns
Club Cells	BSG+/CTSL+	Diagnosis	COPD	Other-ILD	3.82303	-4.68227	12.3283	0.65	ns
Club Cells	BSG+/CTSL+	Diagnosis	IPF	Other-ILD	0.599954	-6.23167	7.43158	0.996	ns
Club Cells	HSPA5+/CTSL+	Diagnosis	Control	COPD	-5.5809	-14.1887	3.02687	0.337	ns
Club Cells	HSPA5+/CTSL+	Diagnosis	Control	IPF	-4.52617	-10.8179	1.7656	0.247	ns
Club Cells	HSPA5+/CTSL+	Diagnosis	Control	Other-ILD	-5.02857	-13.4521	3.395	0.412	ns
Club Cells	HSPA5+/CTSL+	Diagnosis	COPD	IPF	1.05473	-7.06177	9.17124	0.987	ns
Club Cells	HSPA5+/CTSL+	Diagnosis	COPD	Other-ILD	0.55233	-9.30911	10.4138	0.999	ns
Club Cells	HSPA5+/CTSL+	Diagnosis	IPF	Other-ILD	-0.502404	-8.4233	7.41849	0.998	ns
Club Cells	NRP1+/CTSL+	Diagnosis	Control	COPD	-0.2935	-4.97325	4.38625	0.998	ns
Club Cells	NRP1+/CTSL+	Diagnosis	Control	IPF	1.96359	-1.46416	5.39134	0.449	ns
Club Cells	NRP1+/CTSL+	Diagnosis	Control	Other-ILD	-1.35893	-5.93854	3.22069	0.869	ns
Club Cells	NRP1+/CTSL+	Diagnosis	COPD	IPF	2.25709	-2.16111	6.67529	0.549	ns
Club Cells	NRP1+/CTSL+	Diagnosis	COPD	Other-ILD	-1.06543	-6.42676	4.29591	0.956	ns
Club Cells	NRP1+/CTSL+	Diagnosis	IPF	Other-ILD	-3.32252	-7.6345	0.989471	0.193	ns
Club Cells	ACE2+/FURIN+	Diagnosis	Control	COPD	1.85037e-17	-0.891227	0.891227	1	ns
Club Cells	ACE2+/FURIN+	Diagnosis	Control	IPF	0.446816	-0.20911	1.10274	0.29	ns
Club Cells	ACE2+/FURIN+	Diagnosis	Control	Other-ILD	0.584313	-0.254301	1.42293	0.27	ns
Club Cells	ACE2+/FURIN+	Diagnosis	COPD	IPF	0.446816	-0.406469	1.3001	0.523	ns
Club Cells	ACE2+/FURIN+	Diagnosis	COPD	Other-ILD	0.584313	-0.416252	1.58488	0.427	ns
Club Cells	ACE2+/FURIN+	Diagnosis	IPF	Other-ILD	0.137497	-0.660677	0.935672	0.97	ns
Club Cells	BSG+/FURIN+	Diagnosis	Control	COPD	-5.88815	-11.0974	-0.678851	0.0197	*
Club Cells	BSG+/FURIN+	Diagnosis	Control	IPF	-1.13997	-4.94766	2.66771	0.866	ns
Club Cells	BSG+/FURIN+	Diagnosis	Control	Other-ILD	2.45558	-2.64225	7.5534	0.598	ns
Club Cells	BSG+/FURIN+	Diagnosis	COPD	IPF	4.74818	-0.163815	9.66017	0.0623	ns
Club Cells	BSG+/FURIN+	Diagnosis	COPD	Other-ILD	8.34372	2.37572	14.3117	0.00207	**
Club Cells	BSG+/FURIN+	Diagnosis	IPF	Other-ILD	3.59555	-1.19806	8.38916	0.214	ns
Club Cells	HSPA5+/FURIN+	Diagnosis	Control	COPD	-3.2143	-9.57128	3.14268	0.558	ns
Club Cells	HSPA5+/FURIN+	Diagnosis	Control	IPF	-2.41962	-7.06619	2.22695	0.533	ns
Club Cells	HSPA5+/FURIN+	Diagnosis	Control	Other-ILD	3.04183	-3.17912	9.26278	0.586	ns
Club Cells	HSPA5+/FURIN+	Diagnosis	COPD	IPF	0.794683	-5.19949	6.78886	0.986	ns
Club Cells	HSPA5+/FURIN+	Diagnosis	COPD	Other-ILD	6.25613	-1.02671	13.539	0.12	ns
Club Cells	HSPA5+/FURIN+	Diagnosis	IPF	Other-ILD	5.46145	-0.388268	11.3112	0.0768	ns
Club Cells	NRP1+/FURIN+	Diagnosis	Control	COPD	-0.740817	-3.4167	1.93507	0.89	ns
Club Cells	NRP1+/FURIN+	Diagnosis	Control	IPF	1.38972	-0.547766	3.32721	0.25	ns
Club Cells	NRP1+/FURIN+	Diagnosis	Control	Other-ILD	0.70059	-1.91552	3.3167	0.9	ns
Club Cells	NRP1+/FURIN+	Diagnosis	COPD	IPF	2.13054	-0.399299	4.66038	0.132	ns
Club Cells	NRP1+/FURIN+	Diagnosis	COPD	Other-ILD	1.44141	-1.63922	4.52203	0.62	ns
Club Cells	NRP1+/FURIN+	Diagnosis	IPF	Other-ILD	-0.689134	-3.15566	1.77739	0.888	ns
Differentiating Ciliated Cells	ACE2+/CTSL+	Diagnosis	Control	COPD	-4.44089e-16	-12.386	12.386	1	ns
Differentiating Ciliated Cells	ACE2+/CTSL+	Diagnosis	Control	IPF	1.92308	-4.91668	8.76283	0.877	ns
Differentiating Ciliated Cells	ACE2+/CTSL+	Diagnosis	Control	Other-ILD	0.595238	-7.34255	8.53303	0.997	ns
Differentiating Ciliated Cells	ACE2+/CTSL+	Diagnosis	COPD	IPF	1.92308	-9.67202	13.5182	0.971	ns
Differentiating Ciliated Cells	ACE2+/CTSL+	Diagnosis	COPD	Other-ILD	0.595238	-11.6796	12.8701	0.999	ns
Differentiating Ciliated Cells	ACE2+/CTSL+	Diagnosis	IPF	Other-ILD	-1.32784	-7.96431	5.30863	0.951	ns
Differentiating Ciliated Cells	BSG+/CTSL+	Diagnosis	Control	COPD	29.2857	-26.0636	84.6351	0.505	ns
Differentiating Ciliated Cells	BSG+/CTSL+	Diagnosis	Control	IPF	10.5468	-20.5917	41.6854	0.807	ns
Differentiating Ciliated Cells	BSG+/CTSL+	Diagnosis	Control	Other-ILD	30.1587	-8.24756	68.565	0.173	ns
Differentiating Ciliated Cells	BSG+/CTSL+	Diagnosis	COPD	IPF	-18.7389	-70.4262	32.9485	0.773	ns
Differentiating Ciliated Cells	BSG+/CTSL+	Diagnosis	COPD	Other-ILD	0.873016	-55.492	57.238	1	ns
Differentiating Ciliated Cells	BSG+/CTSL+	Diagnosis	IPF	Other-ILD	19.6119	-13.2982	52.522	0.4	ns
Differentiating Ciliated Cells	HSPA5+/CTSL+	Diagnosis	Control	COPD	20.9524	-37.1448	79.0495	0.776	ns
Differentiating Ciliated Cells	HSPA5+/CTSL+	Diagnosis	Control	IPF	0.72415	-31.9603	33.4086	1	ns
Differentiating Ciliated Cells	HSPA5+/CTSL+	Diagnosis	Control	Other-ILD	24.7024	-15.6106	65.0153	0.375	ns
Differentiating Ciliated Cells	HSPA5+/CTSL+	Diagnosis	COPD	IPF	-20.2282	-74.4816	34.0251	0.758	ns
Differentiating Ciliated Cells	HSPA5+/CTSL+	Diagnosis	COPD	Other-ILD	3.75	-55.4132	62.9132	0.998	ns
Differentiating Ciliated Cells	HSPA5+/CTSL+	Diagnosis	IPF	Other-ILD	23.9782	-10.5657	58.5221	0.267	ns
Differentiating Ciliated Cells	NRP1+/CTSL+	Diagnosis	Control	COPD	-7.14286	-35.509	21.2233	0.91	ns
Differentiating Ciliated Cells	NRP1+/CTSL+	Diagnosis	Control	IPF	-4.70508	-20.6634	11.2532	0.863	ns
Differentiating Ciliated Cells	NRP1+/CTSL+	Diagnosis	Control	Other-ILD	1.78571	-17.8973	21.4687	0.995	ns
Differentiating Ciliated Cells	NRP1+/CTSL+	Diagnosis	COPD	IPF	2.43777	-24.0517	28.9272	0.995	ns
Differentiating Ciliated Cells	NRP1+/CTSL+	Diagnosis	COPD	Other-ILD	8.92857	-19.9581	37.8153	0.846	ns
Differentiating Ciliated Cells	NRP1+/CTSL+	Diagnosis	IPF	Other-ILD	6.4908	-10.3754	23.357	0.74	ns
Differentiating Ciliated Cells	BSG+/FURIN+	Diagnosis	Control	COPD	-8.92857	-36.1065	18.2494	0.821	ns
Differentiating Ciliated Cells	BSG+/FURIN+	Diagnosis	Control	IPF	-7.25431	-22.5441	8.03551	0.595	ns
Differentiating Ciliated Cells	BSG+/FURIN+	Diagnosis	Control	Other-ILD	0	-18.8585	18.8585	1	ns
Differentiating Ciliated Cells	BSG+/FURIN+	Diagnosis	COPD	IPF	1.67426	-23.7056	27.0541	0.998	ns
Differentiating Ciliated Cells	BSG+/FURIN+	Diagnosis	COPD	Other-ILD	8.92857	-18.7481	36.6052	0.829	ns
Differentiating Ciliated Cells	BSG+/FURIN+	Diagnosis	IPF	Other-ILD	7.25431	-8.90538	23.414	0.637	ns
Differentiating Ciliated Cells	HSPA5+/FURIN+	Diagnosis	Control	COPD	-7.14286	-35.6953	21.4096	0.911	ns
Differentiating Ciliated Cells	HSPA5+/FURIN+	Diagnosis	Control	IPF	-1.15071	-17.2138	14.9124	0.998	ns
Differentiating Ciliated Cells	HSPA5+/FURIN+	Diagnosis	Control	Other-ILD	-7.14286	-26.9551	12.6694	0.776	ns
Differentiating Ciliated Cells	HSPA5+/FURIN+	Diagnosis	COPD	IPF	5.99215	-20.6713	32.6556	0.933	ns
Differentiating Ciliated Cells	HSPA5+/FURIN+	Diagnosis	COPD	Other-ILD	-5.32907e-15	-29.0764	29.0764	1	ns
Differentiating Ciliated Cells	HSPA5+/FURIN+	Diagnosis	IPF	Other-ILD	-5.99215	-22.9691	10.9848	0.787	ns
Differentiating Ciliated Cells	BSG+/TMPRSS2+	Diagnosis	Control	COPD	-0.187075	-55.8314	55.4573	1	ns
Differentiating Ciliated Cells	BSG+/TMPRSS2+	Diagnosis	Control	IPF	9.23247	-22.072	40.537	0.863	ns
Differentiating Ciliated Cells	BSG+/TMPRSS2+	Diagnosis	Control	Other-ILD	9.09864	-29.5123	47.7096	0.924	ns
Differentiating Ciliated Cells	BSG+/TMPRSS2+	Diagnosis	COPD	IPF	9.41954	-42.5433	61.3824	0.963	ns
Differentiating Ciliated Cells	BSG+/TMPRSS2+	Diagnosis	COPD	Other-ILD	9.28571	-47.3797	65.9511	0.973	ns
Differentiating Ciliated Cells	BSG+/TMPRSS2+	Diagnosis	IPF	Other-ILD	-0.133828	-33.2193	32.9517	1	ns
Differentiating Ciliated Cells	NRP1+/TMPRSS2+	Diagnosis	Control	COPD	-1.28205	-6.4064	3.8423	0.911	ns
Differentiating Ciliated Cells	NRP1+/TMPRSS2+	Diagnosis	Control	IPF	-0.349073	-3.29672	2.59858	0.989	ns
Differentiating Ciliated Cells	NRP1+/TMPRSS2+	Diagnosis	Control	Other-ILD	-1.28205	-4.86982	2.30571	0.78	ns
Differentiating Ciliated Cells	NRP1+/TMPRSS2+	Diagnosis	COPD	IPF	0.932978	-3.81996	5.68592	0.954	ns
Differentiating Ciliated Cells	NRP1+/TMPRSS2+	Diagnosis	COPD	Other-ILD	-2.22045e-16	-5.17435	5.17435	1	ns
Differentiating Ciliated Cells	NRP1+/TMPRSS2+	Diagnosis	IPF	Other-ILD	-0.932978	-3.96671	2.10075	0.848	ns
Fibroblasts	ACE2+/CTSL+	Diagnosis	Control	COPD	-0.0663339	-0.782061	0.649393	0.995	ns
Fibroblasts	ACE2+/CTSL+	Diagnosis	Control	IPF	0.00558541	-0.51242	0.52359	1	ns
Fibroblasts	ACE2+/CTSL+	Diagnosis	Control	Other-ILD	0.424402	-0.270306	1.11911	0.39	ns
Fibroblasts	ACE2+/CTSL+	Diagnosis	COPD	IPF	0.0719193	-0.611852	0.755691	0.993	ns
Fibroblasts	ACE2+/CTSL+	Diagnosis	COPD	Other-ILD	0.490736	-0.334996	1.31647	0.414	ns
Fibroblasts	ACE2+/CTSL+	Diagnosis	IPF	Other-ILD	0.418817	-0.242922	1.08056	0.358	ns
Fibroblasts	BSG+/CTSL+	Diagnosis	Control	COPD	-2.97615	-16.4255	10.4732	0.94	ns
Fibroblasts	BSG+/CTSL+	Diagnosis	Control	IPF	8.92116	-1.04088	18.8832	0.097	ns
Fibroblasts	BSG+/CTSL+	Diagnosis	Control	Other-ILD	24.7217	11.4099	38.0336	1.64e-05	****
Fibroblasts	BSG+/CTSL+	Diagnosis	COPD	IPF	11.8973	-1.08551	24.8801	0.0855	ns
Fibroblasts	BSG+/CTSL+	Diagnosis	COPD	Other-ILD	27.6979	11.997	43.3988	4.77e-05	****
Fibroblasts	BSG+/CTSL+	Diagnosis	IPF	Other-ILD	15.8006	2.96024	28.6409	0.0089	**
Fibroblasts	HSPA5+/CTSL+	Diagnosis	Control	COPD	-3.34351	-17.1961	10.5091	0.924	ns
Fibroblasts	HSPA5+/CTSL+	Diagnosis	Control	IPF	6.39044	-3.87029	16.6512	0.374	ns
Fibroblasts	HSPA5+/CTSL+	Diagnosis	Control	Other-ILD	27.1322	13.4212	40.8432	3.8e-06	****
Fibroblasts	HSPA5+/CTSL+	Diagnosis	COPD	IPF	9.73395	-3.63812	23.106	0.238	ns
Fibroblasts	HSPA5+/CTSL+	Diagnosis	COPD	Other-ILD	30.4757	14.304	46.6473	1.19e-05	****
Fibroblasts	HSPA5+/CTSL+	Diagnosis	IPF	Other-ILD	20.7417	7.5164	33.967	0.000391	***
Fibroblasts	NRP1+/CTSL+	Diagnosis	Control	COPD	0.861873	-9.49781	11.2216	0.996	ns
Fibroblasts	NRP1+/CTSL+	Diagnosis	Control	IPF	-0.3095	-8.00084	7.38184	1	ns
Fibroblasts	NRP1+/CTSL+	Diagnosis	Control	Other-ILD	-4.86742	-15.1212	5.38636	0.609	ns
Fibroblasts	NRP1+/CTSL+	Diagnosis	COPD	IPF	-1.17137	-11.1854	8.84264	0.99	ns
Fibroblasts	NRP1+/CTSL+	Diagnosis	COPD	Other-ILD	-5.72929	-17.8232	6.36466	0.611	ns
Fibroblasts	NRP1+/CTSL+	Diagnosis	IPF	Other-ILD	-4.55791	-14.4623	5.3465	0.633	ns
Fibroblasts	ACE2+/FURIN+	Diagnosis	Control	COPD	2.99129e-18	-0.0205853	0.0205853	1	ns
Fibroblasts	ACE2+/FURIN+	Diagnosis	Control	IPF	4.78796e-18	-0.0154189	0.0154189	1	ns
Fibroblasts	ACE2+/FURIN+	Diagnosis	Control	Other-ILD	0.0160102	-0.00374747	0.035768	0.155	ns
Fibroblasts	ACE2+/FURIN+	Diagnosis	COPD	IPF	1.79668e-18	-0.0203703	0.0203703	1	ns
Fibroblasts	ACE2+/FURIN+	Diagnosis	COPD	Other-ILD	0.0160102	-0.00781356	0.0398341	0.302	ns
Fibroblasts	ACE2+/FURIN+	Diagnosis	IPF	Other-ILD	0.0160102	-0.00352337	0.0355439	0.148	ns
Fibroblasts	BSG+/FURIN+	Diagnosis	Control	COPD	0.394277	-4.04446	4.83301	0.996	ns
Fibroblasts	BSG+/FURIN+	Diagnosis	Control	IPF	0.695323	-2.59248	3.98313	0.947	ns
Fibroblasts	BSG+/FURIN+	Diagnosis	Control	Other-ILD	4.2803	-0.113058	8.67367	0.0593	ns
Fibroblasts	BSG+/FURIN+	Diagnosis	COPD	IPF	0.301047	-3.98371	4.58581	0.998	ns
Fibroblasts	BSG+/FURIN+	Diagnosis	COPD	Other-ILD	3.88603	-1.29578	9.06784	0.214	ns
Fibroblasts	BSG+/FURIN+	Diagnosis	IPF	Other-ILD	3.58498	-0.652756	7.82272	0.129	ns
Fibroblasts	HSPA5+/FURIN+	Diagnosis	Control	COPD	0.647144	-2.98974	4.28403	0.968	ns
Fibroblasts	HSPA5+/FURIN+	Diagnosis	Control	IPF	0.695692	-2.00283	3.39422	0.909	ns
Fibroblasts	HSPA5+/FURIN+	Diagnosis	Control	Other-ILD	3.33619	-0.263677	6.93605	0.0802	ns
Fibroblasts	HSPA5+/FURIN+	Diagnosis	COPD	IPF	0.0485478	-3.45478	3.55188	1	ns
Fibroblasts	HSPA5+/FURIN+	Diagnosis	COPD	Other-ILD	2.68904	-1.54774	6.92582	0.357	ns
Fibroblasts	HSPA5+/FURIN+	Diagnosis	IPF	Other-ILD	2.64049	-0.824389	6.10538	0.202	ns
Fibroblasts	NRP1+/FURIN+	Diagnosis	Control	COPD	1.71822	-0.732064	4.1685	0.269	ns
Fibroblasts	NRP1+/FURIN+	Diagnosis	Control	IPF	0.842726	-0.976438	2.66189	0.628	ns
Fibroblasts	NRP1+/FURIN+	Diagnosis	Control	Other-ILD	1.37307	-1.07721	3.82335	0.469	ns
Fibroblasts	NRP1+/FURIN+	Diagnosis	COPD	IPF	-0.875493	-3.24402	1.49303	0.774	ns
Fibroblasts	NRP1+/FURIN+	Diagnosis	COPD	Other-ILD	-0.345147	-3.22689	2.5366	0.99	ns
Fibroblasts	NRP1+/FURIN+	Diagnosis	IPF	Other-ILD	0.530345	-1.83818	2.89887	0.938	ns
Fibroblasts	BSG+/TMPRSS2+	Diagnosis	Control	COPD	-0.891397	-2.63447	0.851671	0.549	ns
Fibroblasts	BSG+/TMPRSS2+	Diagnosis	Control	IPF	-0.758578	-2.05191	0.534758	0.428	ns
Fibroblasts	BSG+/TMPRSS2+	Diagnosis	Control	Other-ILD	0.878541	-0.846784	2.60387	0.553	ns
Fibroblasts	BSG+/TMPRSS2+	Diagnosis	COPD	IPF	0.13282	-1.54624	1.81188	0.997	ns
Fibroblasts	BSG+/TMPRSS2+	Diagnosis	COPD	Other-ILD	1.76994	-0.260645	3.80052	0.112	ns
Fibroblasts	BSG+/TMPRSS2+	Diagnosis	IPF	Other-ILD	1.63712	-0.0235136	3.29775	0.0549	ns
Fibroblasts	NRP1+/TMPRSS2+	Diagnosis	Control	COPD	-0.585055	-1.22531	0.055197	0.0869	ns
Fibroblasts	NRP1+/TMPRSS2+	Diagnosis	Control	IPF	-0.412052	-0.897263	0.0731587	0.127	ns
Fibroblasts	NRP1+/TMPRSS2+	Diagnosis	Control	Other-ILD	-0.585055	-1.22531	0.055197	0.0869	ns
Fibroblasts	NRP1+/TMPRSS2+	Diagnosis	COPD	IPF	0.173003	-0.432336	0.778343	0.881	ns
Fibroblasts	NRP1+/TMPRSS2+	Diagnosis	COPD	Other-ILD	8.32667e-17	-0.735479	0.735479	1	ns
Fibroblasts	NRP1+/TMPRSS2+	Diagnosis	IPF	Other-ILD	-0.173003	-0.778343	0.432336	0.881	ns
Goblet Cells	ACE2+/CTSL+	Diagnosis	Control	COPD	0.324037	-0.661607	1.30968	0.829	ns
Goblet Cells	ACE2+/CTSL+	Diagnosis	Control	IPF	0.00567322	-0.707896	0.719242	1	ns
Goblet Cells	ACE2+/CTSL+	Diagnosis	Control	Other-ILD	0.00466165	-0.952599	0.961922	1	ns
Goblet Cells	ACE2+/CTSL+	Diagnosis	COPD	IPF	-0.318364	-1.24636	0.609629	0.81	ns
Goblet Cells	ACE2+/CTSL+	Diagnosis	COPD	Other-ILD	-0.319375	-1.44558	0.80683	0.882	ns
Goblet Cells	ACE2+/CTSL+	Diagnosis	IPF	Other-ILD	-0.00101157	-0.898801	0.896778	1	ns
Goblet Cells	BSG+/CTSL+	Diagnosis	Control	COPD	-2.12866	-7.36476	3.10743	0.719	ns
Goblet Cells	BSG+/CTSL+	Diagnosis	Control	IPF	1.18688	-2.65305	5.02682	0.854	ns
Goblet Cells	BSG+/CTSL+	Diagnosis	Control	Other-ILD	3.19434	-1.98805	8.37673	0.383	ns
Goblet Cells	BSG+/CTSL+	Diagnosis	COPD	IPF	3.31555	-1.60959	8.24069	0.304	ns
Goblet Cells	BSG+/CTSL+	Diagnosis	COPD	Other-ILD	5.323	-0.707671	11.3537	0.105	ns
Goblet Cells	BSG+/CTSL+	Diagnosis	IPF	Other-ILD	2.00746	-2.86055	6.87546	0.71	ns
Goblet Cells	HSPA5+/CTSL+	Diagnosis	Control	COPD	-0.628853	-6.69014	5.43243	0.993	ns
Goblet Cells	HSPA5+/CTSL+	Diagnosis	Control	IPF	2.31914	-2.12596	6.76423	0.532	ns
Goblet Cells	HSPA5+/CTSL+	Diagnosis	Control	Other-ILD	5.96174	-0.0373774	11.9609	0.0521	ns
Goblet Cells	HSPA5+/CTSL+	Diagnosis	COPD	IPF	2.94799	-2.75334	8.64932	0.54	ns
Goblet Cells	HSPA5+/CTSL+	Diagnosis	COPD	Other-ILD	6.59059	-0.3905	13.5717	0.072	ns
Goblet Cells	HSPA5+/CTSL+	Diagnosis	IPF	Other-ILD	3.6426	-1.99259	9.27779	0.34	ns
Goblet Cells	NRP1+/CTSL+	Diagnosis	Control	COPD	0.152745	-3.0382	3.34369	0.999	ns
Goblet Cells	NRP1+/CTSL+	Diagnosis	Control	IPF	1.89015	-0.454501	4.23481	0.161	ns
Goblet Cells	NRP1+/CTSL+	Diagnosis	Control	Other-ILD	0.52457	-2.63365	3.68279	0.973	ns
Goblet Cells	NRP1+/CTSL+	Diagnosis	COPD	IPF	1.73741	-1.26758	4.7424	0.441	ns
Goblet Cells	NRP1+/CTSL+	Diagnosis	COPD	Other-ILD	0.371825	-3.30335	4.047	0.994	ns
Goblet Cells	NRP1+/CTSL+	Diagnosis	IPF	Other-ILD	-1.36558	-4.3358	1.60463	0.634	ns
Goblet Cells	ACE2+/FURIN+	Diagnosis	Control	COPD	0.67998	-1.42941	2.78937	0.835	ns
Goblet Cells	ACE2+/FURIN+	Diagnosis	Control	IPF	-0.11555	-1.65603	1.42493	0.997	ns
Goblet Cells	ACE2+/FURIN+	Diagnosis	Control	Other-ILD	-0.582969	-2.5655	1.39956	0.869	ns
Goblet Cells	ACE2+/FURIN+	Diagnosis	COPD	IPF	-0.795529	-2.83339	1.24233	0.739	ns
Goblet Cells	ACE2+/FURIN+	Diagnosis	COPD	Other-ILD	-1.26295	-3.65255	1.12666	0.515	ns
Goblet Cells	ACE2+/FURIN+	Diagnosis	IPF	Other-ILD	-0.467419	-2.37367	1.43883	0.919	ns
Goblet Cells	BSG+/FURIN+	Diagnosis	Control	COPD	-0.317828	-4.3168	3.68114	0.997	ns
Goblet Cells	BSG+/FURIN+	Diagnosis	Control	IPF	0.96367	-1.96901	3.89635	0.83	ns
Goblet Cells	BSG+/FURIN+	Diagnosis	Control	Other-ILD	0.60914	-3.34882	4.5671	0.979	ns
Goblet Cells	BSG+/FURIN+	Diagnosis	COPD	IPF	1.2815	-2.47999	5.04299	0.814	ns
Goblet Cells	BSG+/FURIN+	Diagnosis	COPD	Other-ILD	0.926968	-3.67885	5.53279	0.954	ns
Goblet Cells	BSG+/FURIN+	Diagnosis	IPF	Other-ILD	-0.35453	-4.07238	3.36332	0.995	ns
Goblet Cells	HSPA5+/FURIN+	Diagnosis	Control	COPD	0.321732	-3.45159	4.09505	0.996	ns
Goblet Cells	HSPA5+/FURIN+	Diagnosis	Control	IPF	0.917756	-1.84944	3.68495	0.826	ns
Goblet Cells	HSPA5+/FURIN+	Diagnosis	Control	Other-ILD	1.77079	-1.96383	5.50541	0.61	ns
Goblet Cells	HSPA5+/FURIN+	Diagnosis	COPD	IPF	0.596023	-2.95321	4.14526	0.972	ns
Goblet Cells	HSPA5+/FURIN+	Diagnosis	COPD	Other-ILD	1.44906	-2.89687	5.79499	0.824	ns
Goblet Cells	HSPA5+/FURIN+	Diagnosis	IPF	Other-ILD	0.853038	-2.65503	4.3611	0.923	ns
Goblet Cells	NRP1+/FURIN+	Diagnosis	Control	COPD	-0.772277	-3.14546	1.60091	0.834	ns
Goblet Cells	NRP1+/FURIN+	Diagnosis	Control	IPF	-0.530568	-2.27434	1.21321	0.86	ns
Goblet Cells	NRP1+/FURIN+	Diagnosis	Control	Other-ILD	0.141191	-2.23199	2.51437	0.999	ns
Goblet Cells	NRP1+/FURIN+	Diagnosis	COPD	IPF	0.241709	-1.99318	2.47659	0.992	ns
Goblet Cells	NRP1+/FURIN+	Diagnosis	COPD	Other-ILD	0.913468	-1.84079	3.66773	0.826	ns
Goblet Cells	NRP1+/FURIN+	Diagnosis	IPF	Other-ILD	0.671759	-1.56313	2.90664	0.864	ns
HAS1 High Fibroblasts	ACE2+/CTSL+	Diagnosis	Control	COPD	-6.23416e-18	-0.058194	0.058194	1	ns
HAS1 High Fibroblasts	ACE2+/CTSL+	Diagnosis	Control	IPF	0.0147558	-0.029308	0.0588196	0.811	ns
HAS1 High Fibroblasts	ACE2+/CTSL+	Diagnosis	Control	Other-ILD	-2.76472e-18	-0.0632914	0.0632914	1	ns
HAS1 High Fibroblasts	ACE2+/CTSL+	Diagnosis	COPD	IPF	0.0147558	-0.0390015	0.0685131	0.886	ns
HAS1 High Fibroblasts	ACE2+/CTSL+	Diagnosis	COPD	Other-ILD	3.46945e-18	-0.0703849	0.0703849	1	ns
HAS1 High Fibroblasts	ACE2+/CTSL+	Diagnosis	IPF	Other-ILD	-0.0147558	-0.0739935	0.0444819	0.912	ns
HAS1 High Fibroblasts	BSG+/CTSL+	Diagnosis	Control	COPD	23.7654	-15.4616	62.9925	0.388	ns
HAS1 High Fibroblasts	BSG+/CTSL+	Diagnosis	Control	IPF	23.6003	-4.26919	51.4698	0.125	ns
HAS1 High Fibroblasts	BSG+/CTSL+	Diagnosis	Control	Other-ILD	31.9665	-7.26055	71.1935	0.149	ns
HAS1 High Fibroblasts	BSG+/CTSL+	Diagnosis	COPD	IPF	-0.165144	-36.0765	35.7462	1	ns
HAS1 High Fibroblasts	BSG+/CTSL+	Diagnosis	COPD	Other-ILD	8.20106	-37.0944	53.4965	0.964	ns
HAS1 High Fibroblasts	BSG+/CTSL+	Diagnosis	IPF	Other-ILD	8.3662	-27.5452	44.2776	0.927	ns
HAS1 High Fibroblasts	HSPA5+/CTSL+	Diagnosis	Control	COPD	14.5062	-27.9904	57.0028	0.805	ns
HAS1 High Fibroblasts	HSPA5+/CTSL+	Diagnosis	Control	IPF	6.50087	-23.6915	36.6933	0.941	ns
HAS1 High Fibroblasts	HSPA5+/CTSL+	Diagnosis	Control	Other-ILD	5.4784	-37.0182	47.975	0.986	ns
HAS1 High Fibroblasts	HSPA5+/CTSL+	Diagnosis	COPD	IPF	-8.00531	-46.9099	30.8993	0.948	ns
HAS1 High Fibroblasts	HSPA5+/CTSL+	Diagnosis	COPD	Other-ILD	-9.02778	-58.0986	40.0431	0.962	ns
HAS1 High Fibroblasts	HSPA5+/CTSL+	Diagnosis	IPF	Other-ILD	-1.02247	-39.9271	37.8821	1	ns
HAS1 High Fibroblasts	NRP1+/CTSL+	Diagnosis	Control	COPD	9.25926	-20.3184	38.837	0.843	ns
HAS1 High Fibroblasts	NRP1+/CTSL+	Diagnosis	Control	IPF	2.32162	-18.6923	23.3356	0.991	ns
HAS1 High Fibroblasts	NRP1+/CTSL+	Diagnosis	Control	Other-ILD	4.36508	-25.2126	33.9428	0.98	ns
HAS1 High Fibroblasts	NRP1+/CTSL+	Diagnosis	COPD	IPF	-6.93764	-34.0153	20.14	0.906	ns
HAS1 High Fibroblasts	NRP1+/CTSL+	Diagnosis	COPD	Other-ILD	-4.89418	-39.0476	29.2592	0.982	ns
HAS1 High Fibroblasts	NRP1+/CTSL+	Diagnosis	IPF	Other-ILD	2.04346	-25.0342	29.1211	0.997	ns
HAS1 High Fibroblasts	BSG+/FURIN+	Diagnosis	Control	COPD	11.1111	-1.95814	24.1804	0.123	ns
HAS1 High Fibroblasts	BSG+/FURIN+	Diagnosis	Control	IPF	1.39289	-7.89237	10.6781	0.979	ns
HAS1 High Fibroblasts	BSG+/FURIN+	Diagnosis	Control	Other-ILD	1.38889	-11.6804	14.4581	0.992	ns
HAS1 High Fibroblasts	BSG+/FURIN+	Diagnosis	COPD	IPF	-9.71822	-21.6828	2.24635	0.151	ns
HAS1 High Fibroblasts	BSG+/FURIN+	Diagnosis	COPD	Other-ILD	-9.72222	-24.8133	5.36884	0.333	ns
HAS1 High Fibroblasts	BSG+/FURIN+	Diagnosis	IPF	Other-ILD	-0.00400109	-11.9686	11.9606	1	ns
HAS1 High Fibroblasts	HSPA5+/FURIN+	Diagnosis	Control	COPD	11.1111	-7.05171	29.2739	0.379	ns
HAS1 High Fibroblasts	HSPA5+/FURIN+	Diagnosis	Control	IPF	4.17022	-8.73384	17.0743	0.83	ns
HAS1 High Fibroblasts	HSPA5+/FURIN+	Diagnosis	Control	Other-ILD	0.694444	-17.4684	18.8573	1	ns
HAS1 High Fibroblasts	HSPA5+/FURIN+	Diagnosis	COPD	IPF	-6.94089	-23.5685	9.68672	0.691	ns
HAS1 High Fibroblasts	HSPA5+/FURIN+	Diagnosis	COPD	Other-ILD	-10.4167	-31.3893	10.5559	0.561	ns
HAS1 High Fibroblasts	HSPA5+/FURIN+	Diagnosis	IPF	Other-ILD	-3.47578	-20.1034	13.1518	0.946	ns
HAS1 High Fibroblasts	NRP1+/FURIN+	Diagnosis	Control	COPD	2.28213e-16	-4.61059	4.61059	1	ns
HAS1 High Fibroblasts	NRP1+/FURIN+	Diagnosis	Control	IPF	1.71665	-1.55902	4.99232	0.515	ns
HAS1 High Fibroblasts	NRP1+/FURIN+	Diagnosis	Control	Other-ILD	6.16791e-18	-4.79885	4.79885	1	ns
HAS1 High Fibroblasts	NRP1+/FURIN+	Diagnosis	COPD	IPF	1.71665	-2.50423	5.93753	0.708	ns
HAS1 High Fibroblasts	NRP1+/FURIN+	Diagnosis	COPD	Other-ILD	-2.22045e-16	-5.4877	5.4877	1	ns
HAS1 High Fibroblasts	NRP1+/FURIN+	Diagnosis	IPF	Other-ILD	-1.71665	-6.1424	2.7091	0.737	ns
HAS1 High Fibroblasts	BSG+/TMPRSS2+	Diagnosis	Control	COPD	3.80868e-16	-0.881044	0.881044	1	ns
HAS1 High Fibroblasts	BSG+/TMPRSS2+	Diagnosis	Control	IPF	0.278912	-0.34704	0.904864	0.645	ns
HAS1 High Fibroblasts	BSG+/TMPRSS2+	Diagnosis	Control	Other-ILD	2.00457e-17	-0.881044	0.881044	1	ns
HAS1 High Fibroblasts	BSG+/TMPRSS2+	Diagnosis	COPD	IPF	0.278912	-0.527663	1.08549	0.799	ns
HAS1 High Fibroblasts	BSG+/TMPRSS2+	Diagnosis	COPD	Other-ILD	-3.60822e-16	-1.01734	1.01734	1	ns
HAS1 High Fibroblasts	BSG+/TMPRSS2+	Diagnosis	IPF	Other-ILD	-0.278912	-1.08549	0.527663	0.799	ns
HAS1 High Fibroblasts	NRP1+/TMPRSS2+	Diagnosis	Control	COPD	-1.47259e-16	-0.719839	0.719839	1	ns
HAS1 High Fibroblasts	NRP1+/TMPRSS2+	Diagnosis	Control	IPF	0.217087	-0.296882	0.731056	0.682	ns
HAS1 High Fibroblasts	NRP1+/TMPRSS2+	Diagnosis	Control	Other-ILD	1.02541e-16	-0.749233	0.749233	1	ns
HAS1 High Fibroblasts	NRP1+/TMPRSS2+	Diagnosis	COPD	IPF	0.217087	-0.443888	0.878061	0.822	ns
HAS1 High Fibroblasts	NRP1+/TMPRSS2+	Diagnosis	COPD	Other-ILD	2.498e-16	-0.85678	0.85678	1	ns
HAS1 High Fibroblasts	NRP1+/TMPRSS2+	Diagnosis	IPF	Other-ILD	-0.217087	-0.909956	0.475783	0.842	ns
Ionocytes	BSG+/TMPRSS2+	Diagnosis	Control	COPD	50	-73.0751	173.075	0.681	ns
Ionocytes	BSG+/TMPRSS2+	Diagnosis	Control	IPF	-30.098	-91.2725	31.0765	0.537	ns
Ionocytes	BSG+/TMPRSS2+	Diagnosis	Control	Other-ILD	-22.2222	-93.2797	48.8352	0.824	ns
Ionocytes	BSG+/TMPRSS2+	Diagnosis	COPD	IPF	-80.098	-193.371	33.1751	0.234	ns
Ionocytes	BSG+/TMPRSS2+	Diagnosis	COPD	Other-ILD	-72.2222	-191.124	46.6796	0.358	ns
Ionocytes	BSG+/TMPRSS2+	Diagnosis	IPF	Other-ILD	7.87582	-44.3974	60.149	0.975	ns
Ionocytes	NRP1+/TMPRSS2+	Diagnosis	Control	COPD	0	-71.6976	71.6976	1	ns
Ionocytes	NRP1+/TMPRSS2+	Diagnosis	Control	IPF	10	-29.0653	49.0653	0.892	ns
Ionocytes	NRP1+/TMPRSS2+	Diagnosis	Control	Other-ILD	-2.66454e-15	-43.9056	43.9056	1	ns
Ionocytes	NRP1+/TMPRSS2+	Diagnosis	COPD	IPF	10	-54.0029	74.0029	0.972	ns
Ionocytes	NRP1+/TMPRSS2+	Diagnosis	COPD	Other-ILD	-2.66454e-15	-67.067	67.067	1	ns
Ionocytes	NRP1+/TMPRSS2+	Diagnosis	IPF	Other-ILD	-10	-39.7243	19.7243	0.787	ns
KRT5-/KRT17+	ACE2+/CTSL+	Diagnosis	Control	COPD	1.38778e-17	-0.628008	0.628008	1	ns
KRT5-/KRT17+	ACE2+/CTSL+	Diagnosis	Control	IPF	0.100334	-0.36827	0.568938	0.944	ns
KRT5-/KRT17+	ACE2+/CTSL+	Diagnosis	Control	Other-ILD	0.154321	-0.39575	0.704392	0.884	ns
KRT5-/KRT17+	ACE2+/CTSL+	Diagnosis	COPD	IPF	0.100334	-0.387897	0.588566	0.95	ns
KRT5-/KRT17+	ACE2+/CTSL+	Diagnosis	COPD	Other-ILD	0.154321	-0.412564	0.721206	0.892	ns
KRT5-/KRT17+	ACE2+/CTSL+	Diagnosis	IPF	Other-ILD	0.0539865	-0.328837	0.43681	0.983	ns
KRT5-/KRT17+	BSG+/CTSL+	Diagnosis	Control	COPD	-19.7703	-40.1848	0.644249	0.0615	ns
KRT5-/KRT17+	BSG+/CTSL+	Diagnosis	Control	IPF	-6.34227	-21.3572	8.67269	0.691	ns
KRT5-/KRT17+	BSG+/CTSL+	Diagnosis	Control	Other-ILD	-9.17932	-26.878	8.51941	0.534	ns
KRT5-/KRT17+	BSG+/CTSL+	Diagnosis	COPD	IPF	13.428	-3.1394	29.9954	0.156	ns
KRT5-/KRT17+	BSG+/CTSL+	Diagnosis	COPD	Other-ILD	10.5909	-8.44257	29.6245	0.473	ns
KRT5-/KRT17+	BSG+/CTSL+	Diagnosis	IPF	Other-ILD	-2.83705	-15.9127	10.2386	0.943	ns
KRT5-/KRT17+	HSPA5+/CTSL+	Diagnosis	Control	COPD	-16.0422	-33.9521	1.86772	0.0964	ns
KRT5-/KRT17+	HSPA5+/CTSL+	Diagnosis	Control	IPF	-1.75958	-14.9324	11.4132	0.986	ns
KRT5-/KRT17+	HSPA5+/CTSL+	Diagnosis	Control	Other-ILD	-1.64785	-17.1752	13.8795	0.993	ns
KRT5-/KRT17+	HSPA5+/CTSL+	Diagnosis	COPD	IPF	14.2826	-0.252178	28.8174	0.0561	ns
KRT5-/KRT17+	HSPA5+/CTSL+	Diagnosis	COPD	Other-ILD	14.3943	-2.304	31.0927	0.117	ns
KRT5-/KRT17+	HSPA5+/CTSL+	Diagnosis	IPF	Other-ILD	0.111736	-11.3597	11.5831	1	ns
KRT5-/KRT17+	NRP1+/CTSL+	Diagnosis	Control	COPD	-2.66454e-15	-8.87042	8.87042	1	ns
KRT5-/KRT17+	NRP1+/CTSL+	Diagnosis	Control	IPF	4.21331	-2.31092	10.7375	0.339	ns
KRT5-/KRT17+	NRP1+/CTSL+	Diagnosis	Control	Other-ILD	3.27707	-4.4133	10.9674	0.685	ns
KRT5-/KRT17+	NRP1+/CTSL+	Diagnosis	COPD	IPF	4.21331	-2.98548	11.4121	0.427	ns
KRT5-/KRT17+	NRP1+/CTSL+	Diagnosis	COPD	Other-ILD	3.27707	-4.99328	11.5474	0.732	ns
KRT5-/KRT17+	NRP1+/CTSL+	Diagnosis	IPF	Other-ILD	-0.936242	-6.61779	4.74531	0.974	ns
KRT5-/KRT17+	ACE2+/FURIN+	Diagnosis	Control	COPD	-6.93889e-18	-0.315129	0.315129	1	ns
KRT5-/KRT17+	ACE2+/FURIN+	Diagnosis	Control	IPF	0.0696328	-0.15645	0.295716	0.849	ns
KRT5-/KRT17+	ACE2+/FURIN+	Diagnosis	Control	Other-ILD	0	-0.264761	0.264761	1	ns
KRT5-/KRT17+	ACE2+/FURIN+	Diagnosis	COPD	IPF	0.0696328	-0.192356	0.331622	0.897	ns
KRT5-/KRT17+	ACE2+/FURIN+	Diagnosis	COPD	Other-ILD	6.93889e-18	-0.296012	0.296012	1	ns
KRT5-/KRT17+	ACE2+/FURIN+	Diagnosis	IPF	Other-ILD	-0.0696328	-0.268204	0.128938	0.792	ns
KRT5-/KRT17+	BSG+/FURIN+	Diagnosis	Control	COPD	10.3989	-14.5362	35.334	0.7	ns
KRT5-/KRT17+	BSG+/FURIN+	Diagnosis	Control	IPF	6.74828	-11.5916	25.0881	0.774	ns
KRT5-/KRT17+	BSG+/FURIN+	Diagnosis	Control	Other-ILD	16.3388	-5.27912	37.9567	0.206	ns
KRT5-/KRT17+	BSG+/FURIN+	Diagnosis	COPD	IPF	-3.65063	-23.8867	16.5854	0.966	ns
KRT5-/KRT17+	BSG+/FURIN+	Diagnosis	COPD	Other-ILD	5.93988	-17.3084	29.1881	0.91	ns
KRT5-/KRT17+	BSG+/FURIN+	Diagnosis	IPF	Other-ILD	9.59051	-6.38054	25.5616	0.404	ns
KRT5-/KRT17+	HSPA5+/FURIN+	Diagnosis	Control	COPD	13.2206	-11.2105	37.6516	0.497	ns
KRT5-/KRT17+	HSPA5+/FURIN+	Diagnosis	Control	IPF	4.41397	-13.5552	22.3831	0.919	ns
KRT5-/KRT17+	HSPA5+/FURIN+	Diagnosis	Control	Other-ILD	9.62325	-11.5577	30.8042	0.64	ns
KRT5-/KRT17+	HSPA5+/FURIN+	Diagnosis	COPD	IPF	-8.80658	-28.6336	11.0205	0.656	ns
KRT5-/KRT17+	HSPA5+/FURIN+	Diagnosis	COPD	Other-ILD	-3.5973	-26.3757	19.1811	0.977	ns
KRT5-/KRT17+	HSPA5+/FURIN+	Diagnosis	IPF	Other-ILD	5.20928	-10.439	20.8575	0.823	ns
KRT5-/KRT17+	NRP1+/FURIN+	Diagnosis	Control	COPD	7.18045	-6.57788	20.9388	0.528	ns
KRT5-/KRT17+	NRP1+/FURIN+	Diagnosis	Control	IPF	3.25054	-6.86876	13.3699	0.838	ns
KRT5-/KRT17+	NRP1+/FURIN+	Diagnosis	Control	Other-ILD	3.47019	-8.45784	15.3982	0.874	ns
KRT5-/KRT17+	NRP1+/FURIN+	Diagnosis	COPD	IPF	-3.92991	-15.0955	7.23566	0.797	ns
KRT5-/KRT17+	NRP1+/FURIN+	Diagnosis	COPD	Other-ILD	-3.71026	-16.5379	9.11735	0.876	ns
KRT5-/KRT17+	NRP1+/FURIN+	Diagnosis	IPF	Other-ILD	0.219648	-8.59264	9.03193	1	ns
KRT5-/KRT17+	ACE2+/TMPRSS2+	Diagnosis	Control	COPD	5.55112e-17	-0.616665	0.616665	1	ns
KRT5-/KRT17+	ACE2+/TMPRSS2+	Diagnosis	Control	IPF	0.165523	-0.277213	0.608258	0.761	ns
KRT5-/KRT17+	ACE2+/TMPRSS2+	Diagnosis	Control	Other-ILD	2.77556e-17	-0.517611	0.517611	1	ns
KRT5-/KRT17+	ACE2+/TMPRSS2+	Diagnosis	COPD	IPF	0.165523	-0.34941	0.680455	0.834	ns
KRT5-/KRT17+	ACE2+/TMPRSS2+	Diagnosis	COPD	Other-ILD	-2.77556e-17	-0.580571	0.580571	1	ns
KRT5-/KRT17+	ACE2+/TMPRSS2+	Diagnosis	IPF	Other-ILD	-0.165523	-0.556421	0.225376	0.685	ns
KRT5-/KRT17+	BSG+/TMPRSS2+	Diagnosis	Control	COPD	12.5313	-17.3979	42.4606	0.697	ns
KRT5-/KRT17+	BSG+/TMPRSS2+	Diagnosis	Control	IPF	16.3651	-5.64799	38.3782	0.219	ns
KRT5-/KRT17+	BSG+/TMPRSS2+	Diagnosis	Control	Other-ILD	24.8475	-1.10023	50.7952	0.0659	ns
KRT5-/KRT17+	BSG+/TMPRSS2+	Diagnosis	COPD	IPF	3.83376	-20.4553	28.1228	0.977	ns
KRT5-/KRT17+	BSG+/TMPRSS2+	Diagnosis	COPD	Other-ILD	12.3161	-15.5885	40.2207	0.661	ns
KRT5-/KRT17+	BSG+/TMPRSS2+	Diagnosis	IPF	Other-ILD	8.48238	-10.6875	27.6522	0.659	ns
KRT5-/KRT17+	NRP1+/TMPRSS2+	Diagnosis	Control	COPD	15	-4.89209	34.8921	0.208	ns
KRT5-/KRT17+	NRP1+/TMPRSS2+	Diagnosis	Control	IPF	10.6201	-4.67825	25.9184	0.275	ns
KRT5-/KRT17+	NRP1+/TMPRSS2+	Diagnosis	Control	Other-ILD	12.7541	-4.78905	30.2973	0.237	ns
KRT5-/KRT17+	NRP1+/TMPRSS2+	Diagnosis	COPD	IPF	-4.37991	-19.6782	10.9184	0.879	ns
KRT5-/KRT17+	NRP1+/TMPRSS2+	Diagnosis	COPD	Other-ILD	-2.24588	-19.7891	15.2973	0.987	ns
KRT5-/KRT17+	NRP1+/TMPRSS2+	Diagnosis	IPF	Other-ILD	2.13403	-9.95344	14.2215	0.968	ns
Lymphatic Endothelial Cells	ACE2+/CTSL+	Diagnosis	Control	COPD	1.1676e-19	-0.0198798	0.0198798	1	ns
Lymphatic Endothelial Cells	ACE2+/CTSL+	Diagnosis	Control	IPF	0.00445077	-0.00787636	0.0167779	0.781	ns
Lymphatic Endothelial Cells	ACE2+/CTSL+	Diagnosis	Control	Other-ILD	-1.0008e-19	-0.0144263	0.0144263	1	ns
Lymphatic Endothelial Cells	ACE2+/CTSL+	Diagnosis	COPD	IPF	0.00445077	-0.0145541	0.0234556	0.928	ns
Lymphatic Endothelial Cells	ACE2+/CTSL+	Diagnosis	COPD	Other-ILD	-2.1684e-19	-0.020429	0.020429	1	ns
Lymphatic Endothelial Cells	ACE2+/CTSL+	Diagnosis	IPF	Other-ILD	-0.00445077	-0.0176454	0.00874387	0.814	ns
Lymphatic Endothelial Cells	BSG+/CTSL+	Diagnosis	Control	COPD	-6.56494	-31.487	18.3571	0.903	ns
Lymphatic Endothelial Cells	BSG+/CTSL+	Diagnosis	Control	IPF	1.49886	-12.3849	15.3826	0.992	ns
Lymphatic Endothelial Cells	BSG+/CTSL+	Diagnosis	Control	Other-ILD	5.27365	-11.0417	21.589	0.835	ns
Lymphatic Endothelial Cells	BSG+/CTSL+	Diagnosis	COPD	IPF	8.0638	-16.1375	32.2651	0.822	ns
Lymphatic Endothelial Cells	BSG+/CTSL+	Diagnosis	COPD	Other-ILD	11.8386	-13.835	37.5122	0.628	ns
Lymphatic Endothelial Cells	BSG+/CTSL+	Diagnosis	IPF	Other-ILD	3.7748	-11.4168	18.9664	0.917	ns
Lymphatic Endothelial Cells	HSPA5+/CTSL+	Diagnosis	Control	COPD	1.92388	-18.6111	22.4589	0.995	ns
Lymphatic Endothelial Cells	HSPA5+/CTSL+	Diagnosis	Control	IPF	6.59006	-4.84971	18.0298	0.441	ns
Lymphatic Endothelial Cells	HSPA5+/CTSL+	Diagnosis	Control	Other-ILD	14.8172	1.37392	28.2606	0.0245	*
Lymphatic Endothelial Cells	HSPA5+/CTSL+	Diagnosis	COPD	IPF	4.66618	-15.275	24.6073	0.929	ns
Lymphatic Endothelial Cells	HSPA5+/CTSL+	Diagnosis	COPD	Other-ILD	12.8934	-8.26094	34.0477	0.39	ns
Lymphatic Endothelial Cells	HSPA5+/CTSL+	Diagnosis	IPF	Other-ILD	8.22718	-4.29024	20.7446	0.323	ns
Lymphatic Endothelial Cells	NRP1+/CTSL+	Diagnosis	Control	COPD	-3.35855	-17.7709	11.0538	0.93	ns
Lymphatic Endothelial Cells	NRP1+/CTSL+	Diagnosis	Control	IPF	-3.27144	-11.3004	4.7575	0.714	ns
Lymphatic Endothelial Cells	NRP1+/CTSL+	Diagnosis	Control	Other-ILD	-4.01734	-13.4525	5.41778	0.685	ns
Lymphatic Endothelial Cells	NRP1+/CTSL+	Diagnosis	COPD	IPF	0.0871069	-13.9085	14.0827	1	ns
Lymphatic Endothelial Cells	NRP1+/CTSL+	Diagnosis	COPD	Other-ILD	-0.658791	-15.5058	14.1882	0.999	ns
Lymphatic Endothelial Cells	NRP1+/CTSL+	Diagnosis	IPF	Other-ILD	-0.745898	-9.53118	8.03938	0.996	ns
Lymphatic Endothelial Cells	ACE2+/FURIN+	Diagnosis	Control	COPD	-8.49292e-19	-0.0273379	0.0273379	1	ns
Lymphatic Endothelial Cells	ACE2+/FURIN+	Diagnosis	Control	IPF	0.00608273	-0.00914686	0.0213123	0.72	ns
Lymphatic Endothelial Cells	ACE2+/FURIN+	Diagnosis	Control	Other-ILD	8.85432e-19	-0.0176287	0.0176287	1	ns
Lymphatic Endothelial Cells	ACE2+/FURIN+	Diagnosis	COPD	IPF	0.00608273	-0.0207797	0.0329452	0.933	ns
Lymphatic Endothelial Cells	ACE2+/FURIN+	Diagnosis	COPD	Other-ILD	1.73472e-18	-0.0282917	0.0282917	1	ns
Lymphatic Endothelial Cells	ACE2+/FURIN+	Diagnosis	IPF	Other-ILD	-0.00608273	-0.0229646	0.0107992	0.779	ns
Lymphatic Endothelial Cells	BSG+/FURIN+	Diagnosis	Control	COPD	1.28769	-12.4479	15.0233	0.995	ns
Lymphatic Endothelial Cells	BSG+/FURIN+	Diagnosis	Control	IPF	3.01467	-4.63722	10.6666	0.735	ns
Lymphatic Endothelial Cells	BSG+/FURIN+	Diagnosis	Control	Other-ILD	3.7552	-5.23685	12.7472	0.698	ns
Lymphatic Endothelial Cells	BSG+/FURIN+	Diagnosis	COPD	IPF	1.72698	-11.6114	15.0653	0.987	ns
Lymphatic Endothelial Cells	BSG+/FURIN+	Diagnosis	COPD	Other-ILD	2.46751	-11.6823	16.6173	0.969	ns
Lymphatic Endothelial Cells	BSG+/FURIN+	Diagnosis	IPF	Other-ILD	0.740526	-7.6322	9.11325	0.996	ns
Lymphatic Endothelial Cells	HSPA5+/FURIN+	Diagnosis	Control	COPD	-2.94043	-18.9748	13.094	0.964	ns
Lymphatic Endothelial Cells	HSPA5+/FURIN+	Diagnosis	Control	IPF	0.0352439	-8.89729	8.96778	1	ns
Lymphatic Endothelial Cells	HSPA5+/FURIN+	Diagnosis	Control	Other-ILD	2.20314	-8.29383	12.7001	0.947	ns
Lymphatic Endothelial Cells	HSPA5+/FURIN+	Diagnosis	COPD	IPF	2.97567	-12.595	18.5464	0.96	ns
Lymphatic Endothelial Cells	HSPA5+/FURIN+	Diagnosis	COPD	Other-ILD	5.14356	-11.3744	21.6615	0.85	ns
Lymphatic Endothelial Cells	HSPA5+/FURIN+	Diagnosis	IPF	Other-ILD	2.16789	-7.60611	11.9419	0.939	ns
Lymphatic Endothelial Cells	NRP1+/FURIN+	Diagnosis	Control	COPD	1.17442	-7.41001	9.75885	0.984	ns
Lymphatic Endothelial Cells	NRP1+/FURIN+	Diagnosis	Control	IPF	1.947	-2.83527	6.72926	0.715	ns
Lymphatic Endothelial Cells	NRP1+/FURIN+	Diagnosis	Control	Other-ILD	-0.0228964	-5.69782	5.65203	1	ns
Lymphatic Endothelial Cells	NRP1+/FURIN+	Diagnosis	COPD	IPF	0.772576	-7.5636	9.10875	0.995	ns
Lymphatic Endothelial Cells	NRP1+/FURIN+	Diagnosis	COPD	Other-ILD	-1.19732	-10.0758	7.68111	0.985	ns
Lymphatic Endothelial Cells	NRP1+/FURIN+	Diagnosis	IPF	Other-ILD	-1.96989	-7.26179	3.322	0.768	ns
Lymphatic Endothelial Cells	ACE2+/TMPRSS2+	Diagnosis	Control	COPD	-0.124069	-0.465782	0.217643	0.778	ns
Lymphatic Endothelial Cells	ACE2+/TMPRSS2+	Diagnosis	Control	IPF	-0.114711	-0.338415	0.108992	0.539	ns
Lymphatic Endothelial Cells	ACE2+/TMPRSS2+	Diagnosis	Control	Other-ILD	-0.124069	-0.390742	0.142603	0.617	ns
Lymphatic Endothelial Cells	ACE2+/TMPRSS2+	Diagnosis	COPD	IPF	0.00935804	-0.317382	0.336098	1	ns
Lymphatic Endothelial Cells	ACE2+/TMPRSS2+	Diagnosis	COPD	Other-ILD	0	-0.357533	0.357533	1	ns
Lymphatic Endothelial Cells	ACE2+/TMPRSS2+	Diagnosis	IPF	Other-ILD	-0.00935804	-0.256553	0.237837	1	ns
Lymphatic Endothelial Cells	BSG+/TMPRSS2+	Diagnosis	Control	COPD	-1.13874	-7.33418	5.05669	0.964	ns
Lymphatic Endothelial Cells	BSG+/TMPRSS2+	Diagnosis	Control	IPF	-0.0675612	-3.51895	3.38383	1	ns
Lymphatic Endothelial Cells	BSG+/TMPRSS2+	Diagnosis	Control	Other-ILD	0.584395	-3.47147	4.64026	0.982	ns
Lymphatic Endothelial Cells	BSG+/TMPRSS2+	Diagnosis	COPD	IPF	1.07118	-4.94509	7.08745	0.967	ns
Lymphatic Endothelial Cells	BSG+/TMPRSS2+	Diagnosis	COPD	Other-ILD	1.72314	-4.65914	8.10541	0.896	ns
Lymphatic Endothelial Cells	BSG+/TMPRSS2+	Diagnosis	IPF	Other-ILD	0.651957	-3.12456	4.42848	0.97	ns
Lymphatic Endothelial Cells	NRP1+/TMPRSS2+	Diagnosis	Control	COPD	-0.440555	-3.71558	2.83447	0.985	ns
Lymphatic Endothelial Cells	NRP1+/TMPRSS2+	Diagnosis	Control	IPF	0.00913266	-1.91437	1.93263	1	ns
Lymphatic Endothelial Cells	NRP1+/TMPRSS2+	Diagnosis	Control	Other-ILD	0.613085	-1.61233	2.8385	0.89	ns
Lymphatic Endothelial Cells	NRP1+/TMPRSS2+	Diagnosis	COPD	IPF	0.449687	-2.66749	3.56686	0.982	ns
Lymphatic Endothelial Cells	NRP1+/TMPRSS2+	Diagnosis	COPD	Other-ILD	1.05364	-2.25837	4.36565	0.841	ns
Lymphatic Endothelial Cells	NRP1+/TMPRSS2+	Diagnosis	IPF	Other-ILD	0.603953	-1.38185	2.58975	0.858	ns
Macrophages	ACE2+/CTSL+	Diagnosis	Control	COPD	-0.03193	-0.10839	0.0445301	0.7	ns
Macrophages	ACE2+/CTSL+	Diagnosis	Control	IPF	-0.0285172	-0.0832282	0.0261938	0.531	ns
Macrophages	ACE2+/CTSL+	Diagnosis	Control	Other-ILD	-0.0892929	-0.163481	-0.0151053	0.0112	*
Macrophages	ACE2+/CTSL+	Diagnosis	COPD	IPF	0.00341276	-0.0698222	0.0766477	0.999	ns
Macrophages	ACE2+/CTSL+	Diagnosis	COPD	Other-ILD	-0.0573629	-0.146098	0.0313718	0.339	ns
Macrophages	ACE2+/CTSL+	Diagnosis	IPF	Other-ILD	-0.0607757	-0.131635	0.0100834	0.12	ns
Macrophages	BSG+/CTSL+	Diagnosis	Control	COPD	-3.68564	-10.9105	3.53921	0.551	ns
Macrophages	BSG+/CTSL+	Diagnosis	Control	IPF	6.79011	1.51667	12.0636	0.00549	**
Macrophages	BSG+/CTSL+	Diagnosis	Control	Other-ILD	14.954	7.72911	22.1788	1.18e-06	****
Macrophages	BSG+/CTSL+	Diagnosis	COPD	IPF	10.4758	3.46558	17.4859	0.000814	***
Macrophages	BSG+/CTSL+	Diagnosis	COPD	Other-ILD	18.6396	10.0645	27.2147	3.04e-07	****
Macrophages	BSG+/CTSL+	Diagnosis	IPF	Other-ILD	8.16384	1.15367	15.174	0.0151	*
Macrophages	HSPA5+/CTSL+	Diagnosis	Control	COPD	-14.422	-22.8231	-6.02091	7.97e-05	****
Macrophages	HSPA5+/CTSL+	Diagnosis	Control	IPF	2.35438	-3.7776	8.48637	0.753	ns
Macrophages	HSPA5+/CTSL+	Diagnosis	Control	Other-ILD	12.8299	4.42882	21.231	0.000588	***
Macrophages	HSPA5+/CTSL+	Diagnosis	COPD	IPF	16.7764	8.62492	24.9278	1.37e-06	****
Macrophages	HSPA5+/CTSL+	Diagnosis	COPD	Other-ILD	27.2519	17.2808	37.223	9.6e-11	****
Macrophages	HSPA5+/CTSL+	Diagnosis	IPF	Other-ILD	10.4755	2.32406	18.627	0.00561	**
Macrophages	NRP1+/CTSL+	Diagnosis	Control	COPD	6.27933	-0.0740709	12.6327	0.054	ns
Macrophages	NRP1+/CTSL+	Diagnosis	Control	IPF	0.871257	-3.76611	5.50862	0.962	ns
Macrophages	NRP1+/CTSL+	Diagnosis	Control	Other-ILD	-0.688636	-7.04203	5.66476	0.992	ns
Macrophages	NRP1+/CTSL+	Diagnosis	COPD	IPF	-5.40807	-11.5727	0.756544	0.108	ns
Macrophages	NRP1+/CTSL+	Diagnosis	COPD	Other-ILD	-6.96796	-14.5087	0.572788	0.0816	ns
Macrophages	NRP1+/CTSL+	Diagnosis	IPF	Other-ILD	-1.55989	-7.72451	4.60472	0.914	ns
Macrophages	ACE2+/FURIN+	Diagnosis	Control	COPD	-0.0283684	-0.0801498	0.023413	0.484	ns
Macrophages	ACE2+/FURIN+	Diagnosis	Control	IPF	-0.0211123	-0.0593554	0.0171308	0.478	ns
Macrophages	ACE2+/FURIN+	Diagnosis	Control	Other-ILD	-0.0448789	-0.094563	0.00480517	0.0919	ns
Macrophages	ACE2+/FURIN+	Diagnosis	COPD	IPF	0.00725609	-0.0438484	0.0583606	0.983	ns
Macrophages	ACE2+/FURIN+	Diagnosis	COPD	Other-ILD	-0.0165105	-0.0766574	0.0436363	0.891	ns
Macrophages	ACE2+/FURIN+	Diagnosis	IPF	Other-ILD	-0.0237666	-0.0727448	0.0252116	0.587	ns
Macrophages	BSG+/FURIN+	Diagnosis	Control	COPD	-1.99506	-5.35079	1.36067	0.416	ns
Macrophages	BSG+/FURIN+	Diagnosis	Control	IPF	2.48014	0.0307809	4.9295	0.0459	*
Macrophages	BSG+/FURIN+	Diagnosis	Control	Other-ILD	1.55473	-1.801	4.91046	0.628	ns
Macrophages	BSG+/FURIN+	Diagnosis	COPD	IPF	4.4752	1.21918	7.73122	0.00254	**
Macrophages	BSG+/FURIN+	Diagnosis	COPD	Other-ILD	3.54979	-0.433076	7.53265	0.0996	ns
Macrophages	BSG+/FURIN+	Diagnosis	IPF	Other-ILD	-0.925413	-4.18143	2.3306	0.883	ns
Macrophages	HSPA5+/FURIN+	Diagnosis	Control	COPD	-3.62576	-6.92979	-0.32174	0.0252	*
Macrophages	HSPA5+/FURIN+	Diagnosis	Control	IPF	0.807704	-1.60781	3.22321	0.823	ns
Macrophages	HSPA5+/FURIN+	Diagnosis	Control	Other-ILD	1.20731	-2.09671	4.51134	0.78	ns
Macrophages	HSPA5+/FURIN+	Diagnosis	COPD	IPF	4.43347	1.23353	7.63341	0.0023	**
Macrophages	HSPA5+/FURIN+	Diagnosis	COPD	Other-ILD	4.83308	0.918808	8.74735	0.00858	**
Macrophages	HSPA5+/FURIN+	Diagnosis	IPF	Other-ILD	0.39961	-2.80033	3.59955	0.988	ns
Macrophages	NRP1+/FURIN+	Diagnosis	Control	COPD	0.446329	-1.58076	2.47342	0.941	ns
Macrophages	NRP1+/FURIN+	Diagnosis	Control	IPF	0.586596	-0.877445	2.05064	0.728	ns
Macrophages	NRP1+/FURIN+	Diagnosis	Control	Other-ILD	-0.987299	-3.01439	1.03979	0.589	ns
Macrophages	NRP1+/FURIN+	Diagnosis	COPD	IPF	0.140266	-1.82787	2.1084	0.998	ns
Macrophages	NRP1+/FURIN+	Diagnosis	COPD	Other-ILD	-1.43363	-3.85008	0.982827	0.418	ns
Macrophages	NRP1+/FURIN+	Diagnosis	IPF	Other-ILD	-1.57389	-3.54203	0.394243	0.166	ns
Macrophages	ACE2+/TMPRSS2+	Diagnosis	Control	COPD	-3.66715e-19	-0.00408204	0.00408204	1	ns
Macrophages	ACE2+/TMPRSS2+	Diagnosis	Control	IPF	0.00154427	-0.0014983	0.00458684	0.551	ns
Macrophages	ACE2+/TMPRSS2+	Diagnosis	Control	Other-ILD	-2.58295e-19	-0.0037601	0.0037601	1	ns
Macrophages	ACE2+/TMPRSS2+	Diagnosis	COPD	IPF	0.00154427	-0.00230431	0.00539285	0.723	ns
Macrophages	ACE2+/TMPRSS2+	Diagnosis	COPD	Other-ILD	1.0842e-19	-0.00443764	0.00443764	1	ns
Macrophages	ACE2+/TMPRSS2+	Diagnosis	IPF	Other-ILD	-0.00154427	-0.00504954	0.00196099	0.661	ns
Macrophages	BSG+/TMPRSS2+	Diagnosis	Control	COPD	0.414246	0.060992	0.767501	0.0142	*
Macrophages	BSG+/TMPRSS2+	Diagnosis	Control	IPF	0.032953	-0.22303	0.288936	0.987	ns
Macrophages	BSG+/TMPRSS2+	Diagnosis	Control	Other-ILD	-0.0722377	-0.421809	0.277333	0.951	ns
Macrophages	BSG+/TMPRSS2+	Diagnosis	COPD	IPF	-0.381293	-0.723024	-0.0395628	0.0219	*
Macrophages	BSG+/TMPRSS2+	Diagnosis	COPD	Other-ILD	-0.486484	-0.90296	-0.0700081	0.0147	*
Macrophages	BSG+/TMPRSS2+	Diagnosis	IPF	Other-ILD	-0.105191	-0.443112	0.232731	0.852	ns
Macrophages	NRP1+/TMPRSS2+	Diagnosis	Control	COPD	0.359273	-0.0489168	0.767463	0.106	ns
Macrophages	NRP1+/TMPRSS2+	Diagnosis	Control	IPF	-0.121552	-0.429453	0.186349	0.737	ns
Macrophages	NRP1+/TMPRSS2+	Diagnosis	Control	Other-ILD	-0.266958	-0.67921	0.145294	0.339	ns
Macrophages	NRP1+/TMPRSS2+	Diagnosis	COPD	IPF	-0.480825	-0.86569	-0.0959601	0.00762	**
Macrophages	NRP1+/TMPRSS2+	Diagnosis	COPD	Other-ILD	-0.626231	-1.09875	-0.153717	0.00397	**
Macrophages	NRP1+/TMPRSS2+	Diagnosis	IPF	Other-ILD	-0.145406	-0.534576	0.243764	0.768	ns
Mast Cells	ACE2+/CTSL+	Diagnosis	Control	COPD	0.206612	-0.0822934	0.495517	0.25	ns
Mast Cells	ACE2+/CTSL+	Diagnosis	Control	IPF	0.0172563	-0.209565	0.244078	0.997	ns
Mast Cells	ACE2+/CTSL+	Diagnosis	Control	Other-ILD	2.31296e-18	-0.319759	0.319759	1	ns
Mast Cells	ACE2+/CTSL+	Diagnosis	COPD	IPF	-0.189355	-0.450394	0.0716833	0.238	ns
Mast Cells	ACE2+/CTSL+	Diagnosis	COPD	Other-ILD	-0.206612	-0.551487	0.138264	0.405	ns
Mast Cells	ACE2+/CTSL+	Diagnosis	IPF	Other-ILD	-0.0172563	-0.31208	0.277567	0.999	ns
Mast Cells	BSG+/CTSL+	Diagnosis	Control	COPD	-9.08791	-21.7137	3.53791	0.246	ns
Mast Cells	BSG+/CTSL+	Diagnosis	Control	IPF	-2.33886	-12.3474	7.66967	0.93	ns
Mast Cells	BSG+/CTSL+	Diagnosis	Control	Other-ILD	-6.48648	-20.7526	7.77961	0.641	ns
Mast Cells	BSG+/CTSL+	Diagnosis	COPD	IPF	6.74905	-4.47686	17.975	0.405	ns
Mast Cells	BSG+/CTSL+	Diagnosis	COPD	Other-ILD	2.60143	-12.5436	17.7465	0.97	ns
Mast Cells	BSG+/CTSL+	Diagnosis	IPF	Other-ILD	-4.14763	-17.1911	8.89581	0.843	ns
Mast Cells	HSPA5+/CTSL+	Diagnosis	Control	COPD	-10.1938	-21.836	1.44833	0.109	ns
Mast Cells	HSPA5+/CTSL+	Diagnosis	Control	IPF	-3.99969	-13.2285	5.22907	0.675	ns
Mast Cells	HSPA5+/CTSL+	Diagnosis	Control	Other-ILD	8.81536	-4.33925	21.97	0.307	ns
Mast Cells	HSPA5+/CTSL+	Diagnosis	COPD	IPF	6.19412	-4.15718	16.5454	0.409	ns
Mast Cells	HSPA5+/CTSL+	Diagnosis	COPD	Other-ILD	19.0092	5.0441	32.9743	0.00295	**
Mast Cells	HSPA5+/CTSL+	Diagnosis	IPF	Other-ILD	12.8151	0.787837	24.8423	0.0318	*
Mast Cells	NRP1+/CTSL+	Diagnosis	Control	COPD	1.31038	-6.97288	9.59363	0.977	ns
Mast Cells	NRP1+/CTSL+	Diagnosis	Control	IPF	2.55932	-4.0197	9.13835	0.744	ns
Mast Cells	NRP1+/CTSL+	Diagnosis	Control	Other-ILD	2.10498	-7.25438	11.4643	0.937	ns
Mast Cells	NRP1+/CTSL+	Diagnosis	COPD	IPF	1.24895	-6.12736	8.62525	0.972	ns
Mast Cells	NRP1+/CTSL+	Diagnosis	COPD	Other-ILD	0.794605	-9.14139	10.7306	0.997	ns
Mast Cells	NRP1+/CTSL+	Diagnosis	IPF	Other-ILD	-0.454343	-9.02144	8.11276	0.999	ns
Mast Cells	BSG+/FURIN+	Diagnosis	Control	COPD	-2.00401	-10.8144	6.80635	0.935	ns
Mast Cells	BSG+/FURIN+	Diagnosis	Control	IPF	-0.456399	-7.4404	6.5276	0.998	ns
Mast Cells	BSG+/FURIN+	Diagnosis	Control	Other-ILD	-2.92134	-12.8763	7.03361	0.872	ns
Mast Cells	BSG+/FURIN+	Diagnosis	COPD	IPF	1.54761	-6.28589	9.38112	0.956	ns
Mast Cells	BSG+/FURIN+	Diagnosis	COPD	Other-ILD	-0.917329	-11.4856	9.65095	0.996	ns
Mast Cells	BSG+/FURIN+	Diagnosis	IPF	Other-ILD	-2.46494	-11.5667	6.63683	0.896	ns
Mast Cells	HSPA5+/FURIN+	Diagnosis	Control	COPD	-0.622342	-6.78951	5.54483	0.994	ns
Mast Cells	HSPA5+/FURIN+	Diagnosis	Control	IPF	1.79006	-3.09868	6.6788	0.778	ns
Mast Cells	HSPA5+/FURIN+	Diagnosis	Control	Other-ILD	2.3052	-4.66317	9.27358	0.826	ns
Mast Cells	HSPA5+/FURIN+	Diagnosis	COPD	IPF	2.4124	-3.07097	7.89578	0.665	ns
Mast Cells	HSPA5+/FURIN+	Diagnosis	COPD	Other-ILD	2.92755	-4.47015	10.3252	0.734	ns
Mast Cells	HSPA5+/FURIN+	Diagnosis	IPF	Other-ILD	0.515143	-5.85601	6.8863	0.997	ns
Mast Cells	NRP1+/FURIN+	Diagnosis	Control	COPD	0.257388	-4.8663	5.38108	0.999	ns
Mast Cells	NRP1+/FURIN+	Diagnosis	Control	IPF	0.21658	-3.85294	4.2861	0.999	ns
Mast Cells	NRP1+/FURIN+	Diagnosis	Control	Other-ILD	-1.36766	-7.15699	4.42167	0.928	ns
Mast Cells	NRP1+/FURIN+	Diagnosis	COPD	IPF	-0.0408084	-4.6035	4.52188	1	ns
Mast Cells	NRP1+/FURIN+	Diagnosis	COPD	Other-ILD	-1.62505	-7.77106	4.52096	0.902	ns
Mast Cells	NRP1+/FURIN+	Diagnosis	IPF	Other-ILD	-1.58424	-6.88351	3.71503	0.865	ns
Mast Cells	BSG+/TMPRSS2+	Diagnosis	Control	COPD	1.07149e-16	-1.66857	1.66857	1	ns
Mast Cells	BSG+/TMPRSS2+	Diagnosis	Control	IPF	0.537983	-0.784695	1.86066	0.717	ns
Mast Cells	BSG+/TMPRSS2+	Diagnosis	Control	Other-ILD	1.19048	-0.694861	3.07581	0.36	ns
Mast Cells	BSG+/TMPRSS2+	Diagnosis	COPD	IPF	0.537983	-0.945579	2.02154	0.783	ns
Mast Cells	BSG+/TMPRSS2+	Diagnosis	COPD	Other-ILD	1.19048	-0.811017	3.19197	0.414	ns
Mast Cells	BSG+/TMPRSS2+	Diagnosis	IPF	Other-ILD	0.652493	-1.07126	2.37625	0.76	ns
Mast Cells	NRP1+/TMPRSS2+	Diagnosis	Control	COPD	1.05179e-16	-0.964743	0.964743	1	ns
Mast Cells	NRP1+/TMPRSS2+	Diagnosis	Control	IPF	0.276394	-0.504374	1.05716	0.795	ns
Mast Cells	NRP1+/TMPRSS2+	Diagnosis	Control	Other-ILD	4.96679e-17	-1.08389	1.08389	1	ns
Mast Cells	NRP1+/TMPRSS2+	Diagnosis	COPD	IPF	0.276394	-0.562665	1.11545	0.828	ns
Mast Cells	NRP1+/TMPRSS2+	Diagnosis	COPD	Other-ILD	-5.55112e-17	-1.1266	1.1266	1	ns
Mast Cells	NRP1+/TMPRSS2+	Diagnosis	IPF	Other-ILD	-0.276394	-1.2501	0.697312	0.882	ns
Mesothelial	BSG+/CTSL+	Diagnosis	Control	COPD	-2.9888	-24.6272	18.6496	0.984	ns
Mesothelial	BSG+/CTSL+	Diagnosis	Control	IPF	5.30152	-13.7182	24.3212	0.887	ns
Mesothelial	BSG+/CTSL+	Diagnosis	Control	Other-ILD	18.598	-3.91369	41.1098	0.143	ns
Mesothelial	BSG+/CTSL+	Diagnosis	COPD	IPF	8.29032	-8.41663	24.9973	0.571	ns
Mesothelial	BSG+/CTSL+	Diagnosis	COPD	Other-ILD	21.5868	0.991911	42.1818	0.036	*
Mesothelial	BSG+/CTSL+	Diagnosis	IPF	Other-ILD	13.2965	-4.52711	31.1201	0.216	ns
Mesothelial	HSPA5+/CTSL+	Diagnosis	Control	COPD	-9.44394	-30.8253	11.9374	0.66	ns
Mesothelial	HSPA5+/CTSL+	Diagnosis	Control	IPF	-0.221092	-19.0149	18.5727	1	ns
Mesothelial	HSPA5+/CTSL+	Diagnosis	Control	Other-ILD	16.5516	-5.69277	38.7959	0.218	ns
Mesothelial	HSPA5+/CTSL+	Diagnosis	COPD	IPF	9.22285	-7.28567	25.7314	0.469	ns
Mesothelial	HSPA5+/CTSL+	Diagnosis	COPD	Other-ILD	25.9955	5.6452	46.3458	0.00622	**
Mesothelial	HSPA5+/CTSL+	Diagnosis	IPF	Other-ILD	16.7727	-0.83926	34.3846	0.0681	ns
Mesothelial	NRP1+/CTSL+	Diagnosis	Control	COPD	-1.27943	-8.17215	5.61328	0.963	ns
Mesothelial	NRP1+/CTSL+	Diagnosis	Control	IPF	0.545241	-5.51332	6.6038	0.995	ns
Mesothelial	NRP1+/CTSL+	Diagnosis	Control	Other-ILD	-1.65363	-8.82455	5.51729	0.932	ns
Mesothelial	NRP1+/CTSL+	Diagnosis	COPD	IPF	1.82468	-3.49718	7.14653	0.809	ns
Mesothelial	NRP1+/CTSL+	Diagnosis	COPD	Other-ILD	-0.374195	-6.93453	6.18614	0.999	ns
Mesothelial	NRP1+/CTSL+	Diagnosis	IPF	Other-ILD	-2.19887	-7.87643	3.47869	0.746	ns
Mesothelial	BSG+/FURIN+	Diagnosis	Control	COPD	0.70826	-10.3625	11.7791	0.998	ns
Mesothelial	BSG+/FURIN+	Diagnosis	Control	IPF	3.42367	-6.30735	13.1547	0.797	ns
Mesothelial	BSG+/FURIN+	Diagnosis	Control	Other-ILD	6.54871	-4.96893	18.0663	0.453	ns
Mesothelial	BSG+/FURIN+	Diagnosis	COPD	IPF	2.71541	-5.83234	11.2632	0.842	ns
Mesothelial	BSG+/FURIN+	Diagnosis	COPD	Other-ILD	5.84045	-4.6965	16.3774	0.476	ns
Mesothelial	BSG+/FURIN+	Diagnosis	IPF	Other-ILD	3.12504	-5.99403	12.2441	0.809	ns
Mesothelial	HSPA5+/FURIN+	Diagnosis	Control	COPD	1.19027	-9.67658	12.0571	0.992	ns
Mesothelial	HSPA5+/FURIN+	Diagnosis	Control	IPF	3.41424	-6.13751	12.966	0.789	ns
Mesothelial	HSPA5+/FURIN+	Diagnosis	Control	Other-ILD	7.32405	-3.9814	18.6295	0.336	ns
Mesothelial	HSPA5+/FURIN+	Diagnosis	COPD	IPF	2.22397	-6.16631	10.6143	0.901	ns
Mesothelial	HSPA5+/FURIN+	Diagnosis	COPD	Other-ILD	6.13379	-4.20905	16.4766	0.415	ns
Mesothelial	HSPA5+/FURIN+	Diagnosis	IPF	Other-ILD	3.90982	-5.04126	12.8609	0.668	ns
Mesothelial	NRP1+/FURIN+	Diagnosis	Control	COPD	0.581281	-1.24227	2.40483	0.841	ns
Mesothelial	NRP1+/FURIN+	Diagnosis	Control	IPF	0.464345	-1.12726	2.05595	0.873	ns
Mesothelial	NRP1+/FURIN+	Diagnosis	Control	Other-ILD	0.676937	-1.22472	2.57859	0.791	ns
Mesothelial	NRP1+/FURIN+	Diagnosis	COPD	IPF	-0.116936	-1.53156	1.29769	0.996	ns
Mesothelial	NRP1+/FURIN+	Diagnosis	COPD	Other-ILD	0.0956567	-1.66055	1.85186	0.999	ns
Mesothelial	NRP1+/FURIN+	Diagnosis	IPF	Other-ILD	0.212592	-1.30138	1.72657	0.983	ns
Mesothelial	BSG+/TMPRSS2+	Diagnosis	Control	COPD	0.712644	-0.525349	1.95064	0.442	ns
Mesothelial	BSG+/TMPRSS2+	Diagnosis	Control	IPF	0.179104	-0.901424	1.25963	0.973	ns
Mesothelial	BSG+/TMPRSS2+	Diagnosis	Control	Other-ILD	1.98254e-17	-1.27891	1.27891	1	ns
Mesothelial	BSG+/TMPRSS2+	Diagnosis	COPD	IPF	-0.533539	-1.49391	0.426836	0.474	ns
Mesothelial	BSG+/TMPRSS2+	Diagnosis	COPD	Other-ILD	-0.712644	-1.8918	0.466508	0.398	ns
Mesothelial	BSG+/TMPRSS2+	Diagnosis	IPF	Other-ILD	-0.179104	-1.19168	0.833473	0.968	ns
Mesothelial	NRP1+/TMPRSS2+	Diagnosis	Control	COPD	0.31746	-0.176237	0.811158	0.342	ns
Mesothelial	NRP1+/TMPRSS2+	Diagnosis	Control	IPF	9.52764e-18	-0.44507	0.44507	1	ns
Mesothelial	NRP1+/TMPRSS2+	Diagnosis	Control	Other-ILD	8.67362e-18	-0.510581	0.510581	1	ns
Mesothelial	NRP1+/TMPRSS2+	Diagnosis	COPD	IPF	-0.31746	-0.669464	0.0345431	0.0928	ns
Mesothelial	NRP1+/TMPRSS2+	Diagnosis	COPD	Other-ILD	-0.31746	-0.74933	0.11441	0.228	ns
Mesothelial	NRP1+/TMPRSS2+	Diagnosis	IPF	Other-ILD	-8.54018e-19	-0.375316	0.375316	1	ns
Monocytes	ACE2+/CTSL+	Diagnosis	Control	COPD	-0.00134116	-0.0672734	0.0645911	1	ns
Monocytes	ACE2+/CTSL+	Diagnosis	Control	IPF	0.0159705	-0.0314754	0.0634163	0.818	ns
Monocytes	ACE2+/CTSL+	Diagnosis	Control	Other-ILD	-0.0161472	-0.0810703	0.048776	0.917	ns
Monocytes	ACE2+/CTSL+	Diagnosis	COPD	IPF	0.0173116	-0.0457599	0.0803832	0.892	ns
Monocytes	ACE2+/CTSL+	Diagnosis	COPD	Other-ILD	-0.014806	-0.09189	0.0622779	0.959	ns
Monocytes	ACE2+/CTSL+	Diagnosis	IPF	Other-ILD	-0.0321177	-0.0941336	0.0298983	0.536	ns
Monocytes	BSG+/CTSL+	Diagnosis	Control	COPD	-6.26806	-12.4267	-0.109415	0.0443	*
Monocytes	BSG+/CTSL+	Diagnosis	Control	IPF	0.363552	-4.16624	4.89334	0.997	ns
Monocytes	BSG+/CTSL+	Diagnosis	Control	Other-ILD	1.77085	-4.45269	7.99438	0.882	ns
Monocytes	BSG+/CTSL+	Diagnosis	COPD	IPF	6.63161	0.663077	12.6001	0.0227	*
Monocytes	BSG+/CTSL+	Diagnosis	COPD	Other-ILD	8.0389	0.701544	15.3763	0.0255	*
Monocytes	BSG+/CTSL+	Diagnosis	IPF	Other-ILD	1.40729	-4.62818	7.44277	0.931	ns
Monocytes	HSPA5+/CTSL+	Diagnosis	Control	COPD	-7.57867	-16.2779	1.1206	0.112	ns
Monocytes	HSPA5+/CTSL+	Diagnosis	Control	IPF	0.118427	-6.28003	6.51688	1	ns
Monocytes	HSPA5+/CTSL+	Diagnosis	Control	Other-ILD	3.80268	-4.98826	12.5936	0.678	ns
Monocytes	HSPA5+/CTSL+	Diagnosis	COPD	IPF	7.69709	-0.733635	16.1278	0.0873	ns
Monocytes	HSPA5+/CTSL+	Diagnosis	COPD	Other-ILD	11.3813	1.01711	21.7456	0.025	*
Monocytes	HSPA5+/CTSL+	Diagnosis	IPF	Other-ILD	3.68425	-4.84103	12.2095	0.679	ns
Monocytes	NRP1+/CTSL+	Diagnosis	Control	COPD	-0.0780255	-1.98185	1.8258	1	ns
Monocytes	NRP1+/CTSL+	Diagnosis	Control	IPF	-0.687925	-2.08822	0.712372	0.582	ns
Monocytes	NRP1+/CTSL+	Diagnosis	Control	Other-ILD	-1.15235	-3.07624	0.771535	0.41	ns
Monocytes	NRP1+/CTSL+	Diagnosis	COPD	IPF	-0.609899	-2.45496	1.23516	0.828	ns
Monocytes	NRP1+/CTSL+	Diagnosis	COPD	Other-ILD	-1.07433	-3.34253	1.19388	0.611	ns
Monocytes	NRP1+/CTSL+	Diagnosis	IPF	Other-ILD	-0.464428	-2.33018	1.40132	0.918	ns
Monocytes	ACE2+/FURIN+	Diagnosis	Control	COPD	0.0523315	-0.019415	0.124078	0.233	ns
Monocytes	ACE2+/FURIN+	Diagnosis	Control	IPF	0.0104561	-0.0428583	0.0637704	0.956	ns
Monocytes	ACE2+/FURIN+	Diagnosis	Control	Other-ILD	-0.00543715	-0.0743217	0.0634474	0.997	ns
Monocytes	ACE2+/FURIN+	Diagnosis	COPD	IPF	-0.0418755	-0.112158	0.0284066	0.409	ns
Monocytes	ACE2+/FURIN+	Diagnosis	COPD	Other-ILD	-0.0577687	-0.140486	0.0249491	0.269	ns
Monocytes	ACE2+/FURIN+	Diagnosis	IPF	Other-ILD	-0.0158932	-0.0832511	0.0514647	0.927	ns
Monocytes	BSG+/FURIN+	Diagnosis	Control	COPD	-2.47805	-6.04121	1.0851	0.276	ns
Monocytes	BSG+/FURIN+	Diagnosis	Control	IPF	-0.61077	-3.23153	2.00999	0.931	ns
Monocytes	BSG+/FURIN+	Diagnosis	Control	Other-ILD	-1.80861	-5.40931	1.79208	0.564	ns
Monocytes	BSG+/FURIN+	Diagnosis	COPD	IPF	1.86728	-1.58588	5.32045	0.501	ns
Monocytes	BSG+/FURIN+	Diagnosis	COPD	Other-ILD	0.669443	-3.57567	4.91455	0.977	ns
Monocytes	BSG+/FURIN+	Diagnosis	IPF	Other-ILD	-1.19784	-4.68973	2.29405	0.811	ns
Monocytes	HSPA5+/FURIN+	Diagnosis	Control	COPD	-1.66159	-5.22456	1.90138	0.623	ns
Monocytes	HSPA5+/FURIN+	Diagnosis	Control	IPF	-0.295672	-2.92057	2.32922	0.991	ns
Monocytes	HSPA5+/FURIN+	Diagnosis	Control	Other-ILD	-0.267829	-3.8682	3.33254	0.997	ns
Monocytes	HSPA5+/FURIN+	Diagnosis	COPD	IPF	1.36592	-2.08043	4.81226	0.735	ns
Monocytes	HSPA5+/FURIN+	Diagnosis	COPD	Other-ILD	1.39376	-2.84297	5.63049	0.83	ns
Monocytes	HSPA5+/FURIN+	Diagnosis	IPF	Other-ILD	0.0278433	-3.45715	3.51284	1	ns
Monocytes	NRP1+/FURIN+	Diagnosis	Control	COPD	0.168795	-1.03122	1.36881	0.983	ns
Monocytes	NRP1+/FURIN+	Diagnosis	Control	IPF	-0.447986	-1.32141	0.42544	0.547	ns
Monocytes	NRP1+/FURIN+	Diagnosis	Control	Other-ILD	-0.93197	-2.14514	0.281196	0.196	ns
Monocytes	NRP1+/FURIN+	Diagnosis	COPD	IPF	-0.616781	-1.78053	0.546969	0.519	ns
Monocytes	NRP1+/FURIN+	Diagnosis	COPD	Other-ILD	-1.10076	-2.53715	0.335624	0.197	ns
Monocytes	NRP1+/FURIN+	Diagnosis	IPF	Other-ILD	-0.483984	-1.66129	0.693325	0.712	ns
Monocytes	ACE2+/TMPRSS2+	Diagnosis	Control	COPD	-5.83498e-18	-0.0545883	0.0545883	1	ns
Monocytes	ACE2+/TMPRSS2+	Diagnosis	Control	IPF	0.02072	-0.0202903	0.0617303	0.554	ns
Monocytes	ACE2+/TMPRSS2+	Diagnosis	Control	Other-ILD	-6.30809e-19	-0.0503279	0.0503279	1	ns
Monocytes	ACE2+/TMPRSS2+	Diagnosis	COPD	IPF	0.02072	-0.0306162	0.0720562	0.719	ns
Monocytes	ACE2+/TMPRSS2+	Diagnosis	COPD	Other-ILD	5.20417e-18	-0.0590463	0.0590463	1	ns
Monocytes	ACE2+/TMPRSS2+	Diagnosis	IPF	Other-ILD	-0.02072	-0.0675006	0.0260606	0.657	ns
Monocytes	BSG+/TMPRSS2+	Diagnosis	Control	COPD	0.0128449	-0.108605	0.134295	0.993	ns
Monocytes	BSG+/TMPRSS2+	Diagnosis	Control	IPF	0.00514461	-0.0835502	0.0938394	0.999	ns
Monocytes	BSG+/TMPRSS2+	Diagnosis	Control	Other-ILD	0.0465005	-0.0749498	0.167951	0.755	ns
Monocytes	BSG+/TMPRSS2+	Diagnosis	COPD	IPF	-0.0077003	-0.125032	0.109632	0.998	ns
Monocytes	BSG+/TMPRSS2+	Diagnosis	COPD	Other-ILD	0.0336555	-0.110046	0.177357	0.93	ns
Monocytes	BSG+/TMPRSS2+	Diagnosis	IPF	Other-ILD	0.0413558	-0.0759763	0.158688	0.799	ns
Monocytes	NRP1+/TMPRSS2+	Diagnosis	Control	COPD	0.0865412	-0.00551766	0.1786	0.0738	ns
Monocytes	NRP1+/TMPRSS2+	Diagnosis	Control	IPF	-0.0174818	-0.0874848	0.0525211	0.917	ns
Monocytes	NRP1+/TMPRSS2+	Diagnosis	Control	Other-ILD	-0.000361348	-0.0942802	0.0935575	1	ns
Monocytes	NRP1+/TMPRSS2+	Diagnosis	COPD	IPF	-0.104023	-0.190595	-0.0174508	0.0113	*
Monocytes	NRP1+/TMPRSS2+	Diagnosis	COPD	Other-ILD	-0.0869025	-0.193744	0.0199388	0.155	ns
Monocytes	NRP1+/TMPRSS2+	Diagnosis	IPF	Other-ILD	0.0171205	-0.071427	0.105668	0.959	ns
MUC5AC+	ACE2+/TMPRSS2+	Diagnosis	Control	COPD	-1.89563	-9.97313	6.18187	0.928	ns
MUC5AC+	ACE2+/TMPRSS2+	Diagnosis	Control	IPF	-3.08245	-8.83483	2.66993	0.504	ns
MUC5AC+	ACE2+/TMPRSS2+	Diagnosis	Control	Other-ILD	-3.42494	-10.5368	3.6869	0.593	ns
MUC5AC+	ACE2+/TMPRSS2+	Diagnosis	COPD	IPF	-1.18682	-8.66011	6.28647	0.976	ns
MUC5AC+	ACE2+/TMPRSS2+	Diagnosis	COPD	Other-ILD	-1.52931	-10.0931	7.03448	0.966	ns
MUC5AC+	ACE2+/TMPRSS2+	Diagnosis	IPF	Other-ILD	-0.342493	-6.75984	6.07486	0.999	ns
MUC5AC+	BSG+/TMPRSS2+	Diagnosis	Control	COPD	1.22469	-13.5383	15.9876	0.996	ns
MUC5AC+	BSG+/TMPRSS2+	Diagnosis	Control	IPF	-1.33413	-11.957	9.28876	0.988	ns
MUC5AC+	BSG+/TMPRSS2+	Diagnosis	Control	Other-ILD	1.3632	-12.4213	15.1477	0.994	ns
MUC5AC+	BSG+/TMPRSS2+	Diagnosis	COPD	IPF	-2.55883	-16.1062	10.9885	0.961	ns
MUC5AC+	BSG+/TMPRSS2+	Diagnosis	COPD	Other-ILD	0.138502	-16.0076	16.2846	1	ns
MUC5AC+	BSG+/TMPRSS2+	Diagnosis	IPF	Other-ILD	2.69733	-9.77659	15.1713	0.944	ns
MUC5AC+	NRP1+/TMPRSS2+	Diagnosis	Control	COPD	6.72064	-3.40047	16.8417	0.315	ns
MUC5AC+	NRP1+/TMPRSS2+	Diagnosis	Control	IPF	0.890669	-6.63773	8.41907	0.99	ns
MUC5AC+	NRP1+/TMPRSS2+	Diagnosis	Control	Other-ILD	0.134947	-9.4479	9.7178	1	ns
MUC5AC+	NRP1+/TMPRSS2+	Diagnosis	COPD	IPF	-5.82997	-14.8583	3.19832	0.34	ns
MUC5AC+	NRP1+/TMPRSS2+	Diagnosis	COPD	Other-ILD	-6.58569	-17.3868	4.21543	0.392	ns
MUC5AC+	NRP1+/TMPRSS2+	Diagnosis	IPF	Other-ILD	-0.755721	-9.17618	7.66474	0.996	ns
MUC5B+	ACE2+/TMPRSS2+	Diagnosis	Control	COPD	1.51614	-0.0128191	3.04511	0.0528	ns
MUC5B+	ACE2+/TMPRSS2+	Diagnosis	Control	IPF	0.197145	-0.929911	1.3242	0.968	ns
MUC5B+	ACE2+/TMPRSS2+	Diagnosis	Control	Other-ILD	0.218357	-1.16628	1.60299	0.976	ns
MUC5B+	ACE2+/TMPRSS2+	Diagnosis	COPD	IPF	-1.319	-2.73898	0.100979	0.0787	ns
MUC5B+	ACE2+/TMPRSS2+	Diagnosis	COPD	Other-ILD	-1.29779	-2.92975	0.334172	0.168	ns
MUC5B+	ACE2+/TMPRSS2+	Diagnosis	IPF	Other-ILD	0.0212119	-1.24204	1.28447	1	ns
MUC5B+	BSG+/TMPRSS2+	Diagnosis	Control	COPD	1.26493	-8.64214	11.172	0.988	ns
MUC5B+	BSG+/TMPRSS2+	Diagnosis	Control	IPF	0.510734	-6.79422	7.81569	0.998	ns
MUC5B+	BSG+/TMPRSS2+	Diagnosis	Control	Other-ILD	-3.24557	-12.9538	6.46269	0.823	ns
MUC5B+	BSG+/TMPRSS2+	Diagnosis	COPD	IPF	-0.754195	-9.91377	8.40538	0.997	ns
MUC5B+	BSG+/TMPRSS2+	Diagnosis	COPD	Other-ILD	-4.5105	-15.6813	6.66026	0.723	ns
MUC5B+	BSG+/TMPRSS2+	Diagnosis	IPF	Other-ILD	-3.75631	-12.7005	5.18787	0.698	ns
MUC5B+	NRP1+/TMPRSS2+	Diagnosis	Control	COPD	3.28502	-3.89006	10.4601	0.637	ns
MUC5B+	NRP1+/TMPRSS2+	Diagnosis	Control	IPF	2.74576	-2.68461	8.17612	0.558	ns
MUC5B+	NRP1+/TMPRSS2+	Diagnosis	Control	Other-ILD	-1.35075	-8.45576	5.75427	0.961	ns
MUC5B+	NRP1+/TMPRSS2+	Diagnosis	COPD	IPF	-0.539265	-7.02351	5.94498	0.996	ns
MUC5B+	NRP1+/TMPRSS2+	Diagnosis	COPD	Other-ILD	-4.63577	-12.5754	3.30386	0.432	ns
MUC5B+	NRP1+/TMPRSS2+	Diagnosis	IPF	Other-ILD	-4.09651	-10.5031	2.31011	0.35	ns
Myofibroblasts	ACE2+/CTSL+	Diagnosis	Control	COPD	5.78241e-18	-0.0939672	0.0939672	1	ns
Myofibroblasts	ACE2+/CTSL+	Diagnosis	Control	IPF	0.0149745	-0.0551845	0.0851336	0.944	ns
Myofibroblasts	ACE2+/CTSL+	Diagnosis	Control	Other-ILD	5.78241e-19	-0.0827446	0.0827446	1	ns
Myofibroblasts	ACE2+/CTSL+	Diagnosis	COPD	IPF	0.0149745	-0.0606892	0.0906383	0.954	ns
Myofibroblasts	ACE2+/CTSL+	Diagnosis	COPD	Other-ILD	-5.20417e-18	-0.0874607	0.0874607	1	ns
Myofibroblasts	ACE2+/CTSL+	Diagnosis	IPF	Other-ILD	-0.0149745	-0.0761451	0.046196	0.918	ns
Myofibroblasts	BSG+/CTSL+	Diagnosis	Control	COPD	-19.5597	-54.2291	15.1097	0.458	ns
Myofibroblasts	BSG+/CTSL+	Diagnosis	Control	IPF	-5.16981	-30.7568	20.4172	0.952	ns
Myofibroblasts	BSG+/CTSL+	Diagnosis	Control	Other-ILD	13.877	-15.4876	43.2417	0.608	ns
Myofibroblasts	BSG+/CTSL+	Diagnosis	COPD	IPF	14.3899	-13.0848	41.8646	0.523	ns
Myofibroblasts	BSG+/CTSL+	Diagnosis	COPD	Other-ILD	33.4367	2.41338	64.46	0.0294	*
Myofibroblasts	BSG+/CTSL+	Diagnosis	IPF	Other-ILD	19.0468	-1.32897	39.4226	0.0759	ns
Myofibroblasts	HSPA5+/CTSL+	Diagnosis	Control	COPD	-20.1232	-57.56	17.3136	0.501	ns
Myofibroblasts	HSPA5+/CTSL+	Diagnosis	Control	IPF	-9.1002	-36.7296	18.5292	0.826	ns
Myofibroblasts	HSPA5+/CTSL+	Diagnosis	Control	Other-ILD	12.3691	-19.3395	44.0777	0.74	ns
Myofibroblasts	HSPA5+/CTSL+	Diagnosis	COPD	IPF	11.023	-18.6448	40.6908	0.767	ns
Myofibroblasts	HSPA5+/CTSL+	Diagnosis	COPD	Other-ILD	32.4923	-1.00733	65.992	0.0608	ns
Myofibroblasts	HSPA5+/CTSL+	Diagnosis	IPF	Other-ILD	21.4693	-0.532892	43.4716	0.0586	ns
Myofibroblasts	NRP1+/CTSL+	Diagnosis	Control	COPD	-21.8732	-47.6666	3.92023	0.126	ns
Myofibroblasts	NRP1+/CTSL+	Diagnosis	Control	IPF	-14.1384	-33.1747	4.89786	0.219	ns
Myofibroblasts	NRP1+/CTSL+	Diagnosis	Control	Other-ILD	-22.2321	-44.0789	-0.385359	0.0445	*
Myofibroblasts	NRP1+/CTSL+	Diagnosis	COPD	IPF	7.73478	-12.7059	28.1755	0.757	ns
Myofibroblasts	NRP1+/CTSL+	Diagnosis	COPD	Other-ILD	-0.358923	-23.4397	22.7219	1	ns
Myofibroblasts	NRP1+/CTSL+	Diagnosis	IPF	Other-ILD	-8.0937	-23.2529	7.06551	0.507	ns
Myofibroblasts	ACE2+/FURIN+	Diagnosis	Control	COPD	-1.11022e-16	-0.635665	0.635665	1	ns
Myofibroblasts	ACE2+/FURIN+	Diagnosis	Control	IPF	0.10395	-0.364858	0.572758	0.936	ns
Myofibroblasts	ACE2+/FURIN+	Diagnosis	Control	Other-ILD	-1.94289e-16	-0.538911	0.538911	1	ns
Myofibroblasts	ACE2+/FURIN+	Diagnosis	COPD	IPF	0.10395	-0.415944	0.623844	0.952	ns
Myofibroblasts	ACE2+/FURIN+	Diagnosis	COPD	Other-ILD	-8.32667e-17	-0.583895	0.583895	1	ns
Myofibroblasts	ACE2+/FURIN+	Diagnosis	IPF	Other-ILD	-0.10395	-0.499734	0.291834	0.899	ns
Myofibroblasts	BSG+/FURIN+	Diagnosis	Control	COPD	-0.312223	-16.0721	15.4477	1	ns
Myofibroblasts	BSG+/FURIN+	Diagnosis	Control	IPF	4.47748	-7.15376	16.1087	0.747	ns
Myofibroblasts	BSG+/FURIN+	Diagnosis	Control	Other-ILD	5.68546	-7.66299	19.0339	0.684	ns
Myofibroblasts	BSG+/FURIN+	Diagnosis	COPD	IPF	4.7897	-7.69964	17.279	0.75	ns
Myofibroblasts	BSG+/FURIN+	Diagnosis	COPD	Other-ILD	5.99769	-8.10476	20.1001	0.685	ns
Myofibroblasts	BSG+/FURIN+	Diagnosis	IPF	Other-ILD	1.20798	-8.05436	10.4703	0.986	ns
Myofibroblasts	HSPA5+/FURIN+	Diagnosis	Control	COPD	-3.38307	-21.7962	15.0301	0.964	ns
Myofibroblasts	HSPA5+/FURIN+	Diagnosis	Control	IPF	3.97562	-9.61381	17.565	0.871	ns
Myofibroblasts	HSPA5+/FURIN+	Diagnosis	Control	Other-ILD	2.9382	-12.6575	18.5339	0.961	ns
Myofibroblasts	HSPA5+/FURIN+	Diagnosis	COPD	IPF	7.35868	-7.23331	21.9507	0.555	ns
Myofibroblasts	HSPA5+/FURIN+	Diagnosis	COPD	Other-ILD	6.32126	-10.1554	22.7979	0.749	ns
Myofibroblasts	HSPA5+/FURIN+	Diagnosis	IPF	Other-ILD	-1.03742	-11.8591	9.78429	0.994	ns
Myofibroblasts	NRP1+/FURIN+	Diagnosis	Control	COPD	9.32997	-1.48211	20.142	0.116	ns
Myofibroblasts	NRP1+/FURIN+	Diagnosis	Control	IPF	0.559741	-7.41988	8.53936	0.998	ns
Myofibroblasts	NRP1+/FURIN+	Diagnosis	Control	Other-ILD	0.15335	-9.00437	9.31107	1	ns
Myofibroblasts	NRP1+/FURIN+	Diagnosis	COPD	IPF	-8.77023	-17.3385	-0.20191	0.0427	*
Myofibroblasts	NRP1+/FURIN+	Diagnosis	COPD	Other-ILD	-9.17662	-18.8516	0.498374	0.0697	ns
Myofibroblasts	NRP1+/FURIN+	Diagnosis	IPF	Other-ILD	-0.406391	-6.76083	5.94804	0.998	ns
Myofibroblasts	BSG+/TMPRSS2+	Diagnosis	Control	COPD	2.00694e-16	-1.4741	1.4741	1	ns
Myofibroblasts	BSG+/TMPRSS2+	Diagnosis	Control	IPF	0.442679	-0.64525	1.53061	0.714	ns
Myofibroblasts	BSG+/TMPRSS2+	Diagnosis	Control	Other-ILD	3.41607e-17	-1.24855	1.24855	1	ns
Myofibroblasts	BSG+/TMPRSS2+	Diagnosis	COPD	IPF	0.442679	-0.725512	1.61087	0.756	ns
Myofibroblasts	BSG+/TMPRSS2+	Diagnosis	COPD	Other-ILD	-1.66533e-16	-1.31907	1.31907	1	ns
Myofibroblasts	BSG+/TMPRSS2+	Diagnosis	IPF	Other-ILD	-0.442679	-1.30903	0.423675	0.544	ns
Myofibroblasts	NRP1+/TMPRSS2+	Diagnosis	Control	COPD	-0.362319	-2.33718	1.61255	0.964	ns
Myofibroblasts	NRP1+/TMPRSS2+	Diagnosis	Control	IPF	0.22277	-1.25859	1.70413	0.979	ns
Myofibroblasts	NRP1+/TMPRSS2+	Diagnosis	Control	Other-ILD	-0.362319	-2.06016	1.33553	0.945	ns
Myofibroblasts	NRP1+/TMPRSS2+	Diagnosis	COPD	IPF	0.585089	-0.952439	2.12262	0.754	ns
Myofibroblasts	NRP1+/TMPRSS2+	Diagnosis	COPD	Other-ILD	-2.22045e-16	-1.74707	1.74707	1	ns
Myofibroblasts	NRP1+/TMPRSS2+	Diagnosis	IPF	Other-ILD	-0.585089	-1.74551	0.575333	0.555	ns
NK Cells	ACE2+/CTSL+	Diagnosis	Control	COPD	-0.166667	-0.57817	0.244836	0.718	ns
NK Cells	ACE2+/CTSL+	Diagnosis	Control	IPF	-0.166667	-0.472376	0.139042	0.49	ns
NK Cells	ACE2+/CTSL+	Diagnosis	Control	Other-ILD	-0.166667	-0.646377	0.313043	0.803	ns
NK Cells	ACE2+/CTSL+	Diagnosis	COPD	IPF	1.41053e-17	-0.387173	0.387173	1	ns
NK Cells	ACE2+/CTSL+	Diagnosis	COPD	Other-ILD	0	-0.535319	0.535319	1	ns
NK Cells	ACE2+/CTSL+	Diagnosis	IPF	Other-ILD	-1.41053e-17	-0.459009	0.459009	1	ns
NK Cells	BSG+/CTSL+	Diagnosis	Control	COPD	1.24512	-6.12463	8.61487	0.972	ns
NK Cells	BSG+/CTSL+	Diagnosis	Control	IPF	-1.69918	-7.41177	4.01341	0.867	ns
NK Cells	BSG+/CTSL+	Diagnosis	Control	Other-ILD	-1.14902	-10.2848	7.98674	0.988	ns
NK Cells	BSG+/CTSL+	Diagnosis	COPD	IPF	-2.9443	-9.95221	4.06361	0.696	ns
NK Cells	BSG+/CTSL+	Diagnosis	COPD	Other-ILD	-2.39414	-12.3911	7.60282	0.925	ns
NK Cells	BSG+/CTSL+	Diagnosis	IPF	Other-ILD	0.550157	-8.29629	9.39661	0.999	ns
NK Cells	HSPA5+/CTSL+	Diagnosis	Control	COPD	-5.48772	-15.8354	4.85991	0.517	ns
NK Cells	HSPA5+/CTSL+	Diagnosis	Control	IPF	-0.327587	-8.34845	7.69328	1	ns
NK Cells	HSPA5+/CTSL+	Diagnosis	Control	Other-ILD	-2.50364	-15.3309	10.3236	0.958	ns
NK Cells	HSPA5+/CTSL+	Diagnosis	COPD	IPF	5.16013	-4.67944	14.9997	0.526	ns
NK Cells	HSPA5+/CTSL+	Diagnosis	COPD	Other-ILD	2.98408	-11.0523	17.0205	0.946	ns
NK Cells	HSPA5+/CTSL+	Diagnosis	IPF	Other-ILD	-2.17605	-14.5971	10.245	0.969	ns
NK Cells	NRP1+/CTSL+	Diagnosis	Control	COPD	-0.357766	-0.731677	0.0161446	0.0663	ns
NK Cells	NRP1+/CTSL+	Diagnosis	Control	IPF	-0.305319	-0.595923	-0.014716	0.0353	*
NK Cells	NRP1+/CTSL+	Diagnosis	Control	Other-ILD	-0.435525	-0.899036	0.0279862	0.0739	ns
NK Cells	NRP1+/CTSL+	Diagnosis	COPD	IPF	0.0524469	-0.303733	0.408627	0.981	ns
NK Cells	NRP1+/CTSL+	Diagnosis	COPD	Other-ILD	-0.0777586	-0.584963	0.429446	0.979	ns
NK Cells	NRP1+/CTSL+	Diagnosis	IPF	Other-ILD	-0.130206	-0.579536	0.319125	0.876	ns
NK Cells	BSG+/FURIN+	Diagnosis	Control	COPD	0.158022	-1.43547	1.75152	0.994	ns
NK Cells	BSG+/FURIN+	Diagnosis	Control	IPF	-0.331611	-1.56679	0.903573	0.898	ns
NK Cells	BSG+/FURIN+	Diagnosis	Control	Other-ILD	2.30679	0.331444	4.28213	0.0148	*
NK Cells	BSG+/FURIN+	Diagnosis	COPD	IPF	-0.489632	-2.00489	1.02563	0.836	ns
NK Cells	BSG+/FURIN+	Diagnosis	COPD	Other-ILD	2.14877	-0.0127872	4.31032	0.052	ns
NK Cells	BSG+/FURIN+	Diagnosis	IPF	Other-ILD	2.6384	0.72561	4.55119	0.0025	**
NK Cells	HSPA5+/FURIN+	Diagnosis	Control	COPD	-1.12337	-3.649	1.40225	0.657	ns
NK Cells	HSPA5+/FURIN+	Diagnosis	Control	IPF	-0.636682	-2.59834	1.32498	0.835	ns
NK Cells	HSPA5+/FURIN+	Diagnosis	Control	Other-ILD	0.617364	-2.51015	3.74488	0.956	ns
NK Cells	HSPA5+/FURIN+	Diagnosis	COPD	IPF	0.486693	-1.90762	2.88101	0.952	ns
NK Cells	HSPA5+/FURIN+	Diagnosis	COPD	Other-ILD	1.74074	-1.67481	5.15629	0.55	ns
NK Cells	HSPA5+/FURIN+	Diagnosis	IPF	Other-ILD	1.25405	-1.76842	4.27652	0.705	ns
NK Cells	NRP1+/FURIN+	Diagnosis	Control	COPD	0.0708135	-0.0826955	0.224323	0.63	ns
NK Cells	NRP1+/FURIN+	Diagnosis	Control	IPF	0.0240161	-0.0940159	0.142048	0.952	ns
NK Cells	NRP1+/FURIN+	Diagnosis	Control	Other-ILD	-0.0244385	-0.212699	0.163822	0.987	ns
NK Cells	NRP1+/FURIN+	Diagnosis	COPD	IPF	-0.0467974	-0.193186	0.0995908	0.841	ns
NK Cells	NRP1+/FURIN+	Diagnosis	COPD	Other-ILD	-0.095252	-0.302472	0.111968	0.633	ns
NK Cells	NRP1+/FURIN+	Diagnosis	IPF	Other-ILD	-0.0484546	-0.230955	0.134046	0.901	ns
NK Cells	BSG+/TMPRSS2+	Diagnosis	Control	COPD	0.104079	-0.250906	0.459064	0.872	ns
NK Cells	BSG+/TMPRSS2+	Diagnosis	Control	IPF	0.0967546	-0.176034	0.369543	0.794	ns
NK Cells	BSG+/TMPRSS2+	Diagnosis	Control	Other-ILD	0.438399	0.00348655	0.873312	0.0474	*
NK Cells	BSG+/TMPRSS2+	Diagnosis	COPD	IPF	-0.00732433	-0.344254	0.329605	1	ns
NK Cells	BSG+/TMPRSS2+	Diagnosis	COPD	Other-ILD	0.33432	-0.143442	0.812083	0.27	ns
NK Cells	BSG+/TMPRSS2+	Diagnosis	IPF	Other-ILD	0.341645	-0.0786603	0.76195	0.155	ns
NK Cells	NRP1+/TMPRSS2+	Diagnosis	Control	COPD	0.293442	-0.0776922	0.664576	0.174	ns
NK Cells	NRP1+/TMPRSS2+	Diagnosis	Control	IPF	-1.94289e-17	-0.294121	0.294121	1	ns
NK Cells	NRP1+/TMPRSS2+	Diagnosis	Control	Other-ILD	-1.94289e-17	-0.455808	0.455808	1	ns
NK Cells	NRP1+/TMPRSS2+	Diagnosis	COPD	IPF	-0.293442	-0.63814	0.0512566	0.125	ns
NK Cells	NRP1+/TMPRSS2+	Diagnosis	COPD	Other-ILD	-0.293442	-0.783411	0.196528	0.408	ns
NK Cells	NRP1+/TMPRSS2+	Diagnosis	IPF	Other-ILD	0	-0.434554	0.434554	1	ns
pDCs	BSG+/CTSL+	Diagnosis	Control	COPD	-0.409357	-26.377	25.5583	1	ns
pDCs	BSG+/CTSL+	Diagnosis	Control	IPF	2.99368	-19.1804	25.1678	0.985	ns
pDCs	BSG+/CTSL+	Diagnosis	Control	Other-ILD	11.0964	-11.856	34.0488	0.584	ns
pDCs	BSG+/CTSL+	Diagnosis	COPD	IPF	3.40303	-14.5723	21.3783	0.959	ns
pDCs	BSG+/CTSL+	Diagnosis	COPD	Other-ILD	11.5057	-7.42129	30.4328	0.386	ns
pDCs	BSG+/CTSL+	Diagnosis	IPF	Other-ILD	8.1027	-5.14887	21.3543	0.381	ns
pDCs	HSPA5+/CTSL+	Diagnosis	Control	COPD	0.161315	-24.4198	24.7425	1	ns
pDCs	HSPA5+/CTSL+	Diagnosis	Control	IPF	-6.39175	-27.3819	14.5984	0.854	ns
pDCs	HSPA5+/CTSL+	Diagnosis	Control	Other-ILD	4.65893	-17.0679	26.3858	0.942	ns
pDCs	HSPA5+/CTSL+	Diagnosis	COPD	IPF	-6.55306	-23.5686	10.4625	0.742	ns
pDCs	HSPA5+/CTSL+	Diagnosis	COPD	Other-ILD	4.49762	-13.4188	22.4141	0.912	ns
pDCs	HSPA5+/CTSL+	Diagnosis	IPF	Other-ILD	11.0507	-1.49334	23.5947	0.104	ns
pDCs	NRP1+/CTSL+	Diagnosis	Control	COPD	4.44009	-19.2179	28.0981	0.96	ns
pDCs	NRP1+/CTSL+	Diagnosis	Control	IPF	4.62244	-15.5794	24.8243	0.931	ns
pDCs	NRP1+/CTSL+	Diagnosis	Control	Other-ILD	6.52958	-14.3813	27.4405	0.844	ns
pDCs	NRP1+/CTSL+	Diagnosis	COPD	IPF	0.182353	-16.1942	16.5589	1	ns
pDCs	NRP1+/CTSL+	Diagnosis	COPD	Other-ILD	2.08949	-15.1541	19.3331	0.989	ns
pDCs	NRP1+/CTSL+	Diagnosis	IPF	Other-ILD	1.90714	-10.1658	13.9801	0.976	ns
pDCs	BSG+/FURIN+	Diagnosis	Control	COPD	3.97656	-5.56245	13.5156	0.693	ns
pDCs	BSG+/FURIN+	Diagnosis	Control	IPF	2.26208	-5.8834	10.4076	0.885	ns
pDCs	BSG+/FURIN+	Diagnosis	Control	Other-ILD	1.28968	-7.14169	9.72105	0.978	ns
pDCs	BSG+/FURIN+	Diagnosis	COPD	IPF	-1.71448	-8.31756	4.8886	0.903	ns
pDCs	BSG+/FURIN+	Diagnosis	COPD	Other-ILD	-2.68688	-9.63956	4.26581	0.74	ns
pDCs	BSG+/FURIN+	Diagnosis	IPF	Other-ILD	-0.972394	-5.84025	3.89546	0.953	ns
pDCs	HSPA5+/FURIN+	Diagnosis	Control	COPD	4.70745	-8.04342	17.4583	0.766	ns
pDCs	HSPA5+/FURIN+	Diagnosis	Control	IPF	3.71971	-7.16842	14.6078	0.806	ns
pDCs	HSPA5+/FURIN+	Diagnosis	Control	Other-ILD	5.14069	-6.12959	16.411	0.629	ns
pDCs	HSPA5+/FURIN+	Diagnosis	COPD	IPF	-0.987744	-9.81413	7.83865	0.991	ns
pDCs	HSPA5+/FURIN+	Diagnosis	COPD	Other-ILD	0.433241	-8.86047	9.72695	0.999	ns
pDCs	HSPA5+/FURIN+	Diagnosis	IPF	Other-ILD	1.42098	-5.08592	7.92789	0.939	ns
pDCs	NRP1+/FURIN+	Diagnosis	Control	COPD	1.47513	-7.07699	10.0272	0.969	ns
pDCs	NRP1+/FURIN+	Diagnosis	Control	IPF	2.30093	-5.00183	9.60368	0.841	ns
pDCs	NRP1+/FURIN+	Diagnosis	Control	Other-ILD	0.674603	-6.88447	8.23368	0.995	ns
pDCs	NRP1+/FURIN+	Diagnosis	COPD	IPF	0.825798	-5.09414	6.74573	0.983	ns
pDCs	NRP1+/FURIN+	Diagnosis	COPD	Other-ILD	-0.800525	-7.0339	5.43285	0.987	ns
pDCs	NRP1+/FURIN+	Diagnosis	IPF	Other-ILD	-1.62632	-5.99056	2.73791	0.761	ns
Pericytes	ACE2+/CTSL+	Diagnosis	Control	COPD	0.0813206	-3.79481	3.95745	1	ns
Pericytes	ACE2+/CTSL+	Diagnosis	Control	IPF	0.540711	-2.3523	3.43372	0.962	ns
Pericytes	ACE2+/CTSL+	Diagnosis	Control	Other-ILD	1.4379	-2.15372	5.02952	0.725	ns
Pericytes	ACE2+/CTSL+	Diagnosis	COPD	IPF	0.459391	-3.01079	3.92957	0.986	ns
Pericytes	ACE2+/CTSL+	Diagnosis	COPD	Other-ILD	1.35658	-2.71434	5.4275	0.821	ns
Pericytes	ACE2+/CTSL+	Diagnosis	IPF	Other-ILD	0.89719	-2.25202	4.04639	0.88	ns
Pericytes	BSG+/CTSL+	Diagnosis	Control	COPD	-5.10474	-26.1066	15.8971	0.922	ns
Pericytes	BSG+/CTSL+	Diagnosis	Control	IPF	4.71945	-11.11	20.5489	0.866	ns
Pericytes	BSG+/CTSL+	Diagnosis	Control	Other-ILD	14.3099	-5.48933	34.1092	0.242	ns
Pericytes	BSG+/CTSL+	Diagnosis	COPD	IPF	9.82419	-9.12394	28.7723	0.535	ns
Pericytes	BSG+/CTSL+	Diagnosis	COPD	Other-ILD	19.4147	-2.95657	41.7859	0.114	ns
Pericytes	BSG+/CTSL+	Diagnosis	IPF	Other-ILD	9.59048	-8.01536	27.1963	0.492	ns
Pericytes	HSPA5+/CTSL+	Diagnosis	Control	COPD	-9.10626	-29.0338	10.8213	0.636	ns
Pericytes	HSPA5+/CTSL+	Diagnosis	Control	IPF	7.60934	-7.41034	22.629	0.555	ns
Pericytes	HSPA5+/CTSL+	Diagnosis	Control	Other-ILD	19.8272	1.04074	38.6137	0.0342	*
Pericytes	HSPA5+/CTSL+	Diagnosis	COPD	IPF	16.7156	-1.26328	34.6945	0.0785	ns
Pericytes	HSPA5+/CTSL+	Diagnosis	COPD	Other-ILD	28.9335	7.70659	50.1604	0.00293	**
Pericytes	HSPA5+/CTSL+	Diagnosis	IPF	Other-ILD	12.2179	-4.48738	28.9231	0.233	ns
Pericytes	NRP1+/CTSL+	Diagnosis	Control	COPD	-2.97306	-17.0694	11.1232	0.947	ns
Pericytes	NRP1+/CTSL+	Diagnosis	Control	IPF	6.4352	-4.21351	17.0839	0.399	ns
Pericytes	NRP1+/CTSL+	Diagnosis	Control	Other-ILD	10.6355	-2.65361	23.9247	0.165	ns
Pericytes	NRP1+/CTSL+	Diagnosis	COPD	IPF	9.40826	-3.32975	22.1463	0.225	ns
Pericytes	NRP1+/CTSL+	Diagnosis	COPD	Other-ILD	13.6086	-1.40684	28.624	0.0906	ns
Pericytes	NRP1+/CTSL+	Diagnosis	IPF	Other-ILD	4.20034	-7.63828	16.039	0.794	ns
Pericytes	ACE2+/FURIN+	Diagnosis	Control	COPD	3.66856e-16	-1.70301	1.70301	1	ns
Pericytes	ACE2+/FURIN+	Diagnosis	Control	IPF	0.683327	-0.613284	1.97994	0.514	ns
Pericytes	ACE2+/FURIN+	Diagnosis	Control	Other-ILD	0.0318878	-1.63181	1.69558	1	ns
Pericytes	ACE2+/FURIN+	Diagnosis	COPD	IPF	0.683327	-0.893639	2.26029	0.669	ns
Pericytes	ACE2+/FURIN+	Diagnosis	COPD	Other-ILD	0.0318878	-1.85848	1.92226	1	ns
Pericytes	ACE2+/FURIN+	Diagnosis	IPF	Other-ILD	-0.651439	-2.18587	0.882989	0.683	ns
Pericytes	BSG+/FURIN+	Diagnosis	Control	COPD	-5.91197	-14.3973	2.57334	0.273	ns
Pericytes	BSG+/FURIN+	Diagnosis	Control	IPF	-0.526996	-6.9225	5.86851	0.997	ns
Pericytes	BSG+/FURIN+	Diagnosis	Control	Other-ILD	-3.30254	-11.302	4.6969	0.707	ns
Pericytes	BSG+/FURIN+	Diagnosis	COPD	IPF	5.38497	-2.27059	13.0405	0.265	ns
Pericytes	BSG+/FURIN+	Diagnosis	COPD	Other-ILD	2.60943	-6.42916	11.648	0.877	ns
Pericytes	BSG+/FURIN+	Diagnosis	IPF	Other-ILD	-2.77554	-9.88878	4.33769	0.742	ns
Pericytes	HSPA5+/FURIN+	Diagnosis	Control	COPD	-5.47364	-14.6483	3.70103	0.411	ns
Pericytes	HSPA5+/FURIN+	Diagnosis	Control	IPF	-1.2774	-8.21896	5.66416	0.964	ns
Pericytes	HSPA5+/FURIN+	Diagnosis	Control	Other-ILD	-2.64792	-11.3027	6.00686	0.857	ns
Pericytes	HSPA5+/FURIN+	Diagnosis	COPD	IPF	4.19624	-4.03941	12.4319	0.55	ns
Pericytes	HSPA5+/FURIN+	Diagnosis	COPD	Other-ILD	2.82572	-6.89776	12.5492	0.875	ns
Pericytes	HSPA5+/FURIN+	Diagnosis	IPF	Other-ILD	-1.37052	-9.02276	6.28171	0.967	ns
Pericytes	NRP1+/FURIN+	Diagnosis	Control	COPD	0.00671998	-3.86775	3.88119	1	ns
Pericytes	NRP1+/FURIN+	Diagnosis	Control	IPF	2.47838	-0.44849	5.40526	0.128	ns
Pericytes	NRP1+/FURIN+	Diagnosis	Control	Other-ILD	2.06935	-1.58327	5.72196	0.457	ns
Pericytes	NRP1+/FURIN+	Diagnosis	COPD	IPF	2.47166	-1.02947	5.9728	0.262	ns
Pericytes	NRP1+/FURIN+	Diagnosis	COPD	Other-ILD	2.06263	-2.06447	6.18973	0.566	ns
Pericytes	NRP1+/FURIN+	Diagnosis	IPF	Other-ILD	-0.409037	-3.66296	2.84489	0.988	ns
Pericytes	BSG+/TMPRSS2+	Diagnosis	Control	COPD	4.08832e-17	-0.319391	0.319391	1	ns
Pericytes	BSG+/TMPRSS2+	Diagnosis	Control	IPF	0.138481	-0.103171	0.380132	0.447	ns
Pericytes	BSG+/TMPRSS2+	Diagnosis	Control	Other-ILD	-7.50151e-19	-0.301293	0.301293	1	ns
Pericytes	BSG+/TMPRSS2+	Diagnosis	COPD	IPF	0.138481	-0.148221	0.425182	0.593	ns
Pericytes	BSG+/TMPRSS2+	Diagnosis	COPD	Other-ILD	-4.16334e-17	-0.338496	0.338496	1	ns
Pericytes	BSG+/TMPRSS2+	Diagnosis	IPF	Other-ILD	-0.138481	-0.404872	0.127911	0.533	ns
Pericytes	NRP1+/TMPRSS2+	Diagnosis	Control	COPD	-9.14672e-18	-0.170641	0.170641	1	ns
Pericytes	NRP1+/TMPRSS2+	Diagnosis	Control	IPF	0.0645256	-0.0672532	0.196304	0.582	ns
Pericytes	NRP1+/TMPRSS2+	Diagnosis	Control	Other-ILD	4.73106e-18	-0.163023	0.163023	1	ns
Pericytes	NRP1+/TMPRSS2+	Diagnosis	COPD	IPF	0.0645256	-0.0856922	0.214743	0.68	ns
Pericytes	NRP1+/TMPRSS2+	Diagnosis	COPD	Other-ILD	1.38778e-17	-0.178258	0.178258	1	ns
Pericytes	NRP1+/TMPRSS2+	Diagnosis	IPF	Other-ILD	-0.0645256	-0.206029	0.0769781	0.638	ns
Plasma Cells	BSG+/CTSL+	Diagnosis	Control	COPD	-4.06811	-13.5026	5.36636	0.679	ns
Plasma Cells	BSG+/CTSL+	Diagnosis	Control	IPF	-2.86548	-10.3075	4.57653	0.75	ns
Plasma Cells	BSG+/CTSL+	Diagnosis	Control	Other-ILD	1.00796	-9.14191	11.1578	0.994	ns
Plasma Cells	BSG+/CTSL+	Diagnosis	COPD	IPF	1.20263	-7.65513	10.0604	0.985	ns
Plasma Cells	BSG+/CTSL+	Diagnosis	COPD	Other-ILD	5.07607	-6.15319	16.3053	0.645	ns
Plasma Cells	BSG+/CTSL+	Diagnosis	IPF	Other-ILD	3.87344	-5.74272	13.4896	0.723	ns
Plasma Cells	HSPA5+/CTSL+	Diagnosis	Control	COPD	-4.55415	-15.3319	6.22358	0.692	ns
Plasma Cells	HSPA5+/CTSL+	Diagnosis	Control	IPF	-2.48241	-10.984	6.01918	0.873	ns
Plasma Cells	HSPA5+/CTSL+	Diagnosis	Control	Other-ILD	-0.231077	-11.8261	11.3639	1	ns
Plasma Cells	HSPA5+/CTSL+	Diagnosis	COPD	IPF	2.07174	-8.04718	12.1907	0.951	ns
Plasma Cells	HSPA5+/CTSL+	Diagnosis	COPD	Other-ILD	4.32308	-8.50499	17.1511	0.818	ns
Plasma Cells	HSPA5+/CTSL+	Diagnosis	IPF	Other-ILD	2.25134	-8.73397	13.2366	0.951	ns
Plasma Cells	NRP1+/CTSL+	Diagnosis	Control	COPD	-0.857138	-4.56966	2.85538	0.932	ns
Plasma Cells	NRP1+/CTSL+	Diagnosis	Control	IPF	-1.48225	-4.41073	1.44622	0.556	ns
Plasma Cells	NRP1+/CTSL+	Diagnosis	Control	Other-ILD	-2.67484	-6.66888	1.31919	0.308	ns
Plasma Cells	NRP1+/CTSL+	Diagnosis	COPD	IPF	-0.625114	-4.11069	2.86047	0.967	ns
Plasma Cells	NRP1+/CTSL+	Diagnosis	COPD	Other-ILD	-1.81771	-6.23649	2.60107	0.71	ns
Plasma Cells	NRP1+/CTSL+	Diagnosis	IPF	Other-ILD	-1.19259	-4.97661	2.59142	0.846	ns
Plasma Cells	BSG+/FURIN+	Diagnosis	Control	COPD	-0.267828	-3.55074	3.01508	0.997	ns
Plasma Cells	BSG+/FURIN+	Diagnosis	Control	IPF	1.59215	-0.997439	4.18174	0.384	ns
Plasma Cells	BSG+/FURIN+	Diagnosis	Control	Other-ILD	0.457067	-3.07478	3.98891	0.987	ns
Plasma Cells	BSG+/FURIN+	Diagnosis	COPD	IPF	1.85998	-1.22225	4.94221	0.401	ns
Plasma Cells	BSG+/FURIN+	Diagnosis	COPD	Other-ILD	0.724895	-3.18255	4.63234	0.963	ns
Plasma Cells	BSG+/FURIN+	Diagnosis	IPF	Other-ILD	-1.13509	-4.48122	2.21105	0.815	ns
Plasma Cells	HSPA5+/FURIN+	Diagnosis	Control	COPD	0.203839	-2.93734	3.34501	0.998	ns
Plasma Cells	HSPA5+/FURIN+	Diagnosis	Control	IPF	1.84754	-0.63025	4.32533	0.218	ns
Plasma Cells	HSPA5+/FURIN+	Diagnosis	Control	Other-ILD	2.13858	-1.24079	5.51795	0.358	ns
Plasma Cells	HSPA5+/FURIN+	Diagnosis	COPD	IPF	1.6437	-1.30546	4.59287	0.473	ns
Plasma Cells	HSPA5+/FURIN+	Diagnosis	COPD	Other-ILD	1.93474	-1.804	5.67349	0.537	ns
Plasma Cells	HSPA5+/FURIN+	Diagnosis	IPF	Other-ILD	0.291038	-2.91063	3.49271	0.995	ns
Plasma Cells	NRP1+/FURIN+	Diagnosis	Control	COPD	0.0816697	-1.16323	1.32657	0.998	ns
Plasma Cells	NRP1+/FURIN+	Diagnosis	Control	IPF	0.524492	-0.447008	1.49599	0.501	ns
Plasma Cells	NRP1+/FURIN+	Diagnosis	Control	Other-ILD	5.60554e-17	-1.34444	1.34444	1	ns
Plasma Cells	NRP1+/FURIN+	Diagnosis	COPD	IPF	0.442823	-0.727648	1.61329	0.76	ns
Plasma Cells	NRP1+/FURIN+	Diagnosis	COPD	Other-ILD	-0.0816697	-1.57623	1.41289	0.999	ns
Plasma Cells	NRP1+/FURIN+	Diagnosis	IPF	Other-ILD	-0.524492	-1.80032	0.751335	0.71	ns
Plasma Cells	BSG+/TMPRSS2+	Diagnosis	Control	COPD	-0.3907	-0.970615	0.189214	0.302	ns
Plasma Cells	BSG+/TMPRSS2+	Diagnosis	Control	IPF	-0.3907	-0.844301	0.0629004	0.118	ns
Plasma Cells	BSG+/TMPRSS2+	Diagnosis	Control	Other-ILD	-0.3907	-1.00766	0.226263	0.358	ns
Plasma Cells	BSG+/TMPRSS2+	Diagnosis	COPD	IPF	-1.75785e-17	-0.543277	0.543277	1	ns
Plasma Cells	BSG+/TMPRSS2+	Diagnosis	COPD	Other-ILD	9.71445e-17	-0.685595	0.685595	1	ns
Plasma Cells	BSG+/TMPRSS2+	Diagnosis	IPF	Other-ILD	1.14723e-16	-0.582661	0.582661	1	ns
PLIN2+ Fibroblasts	ACE2+/CTSL+	Diagnosis	Control	COPD	1.42633e-17	-0.23036	0.23036	1	ns
PLIN2+ Fibroblasts	ACE2+/CTSL+	Diagnosis	Control	IPF	0.0787299	-0.0954056	0.252865	0.633	ns
PLIN2+ Fibroblasts	ACE2+/CTSL+	Diagnosis	Control	Other-ILD	7.32439e-18	-0.238445	0.238445	1	ns
PLIN2+ Fibroblasts	ACE2+/CTSL+	Diagnosis	COPD	IPF	0.0787299	-0.134542	0.292001	0.765	ns
PLIN2+ Fibroblasts	ACE2+/CTSL+	Diagnosis	COPD	Other-ILD	-6.93889e-18	-0.268361	0.268361	1	ns
PLIN2+ Fibroblasts	ACE2+/CTSL+	Diagnosis	IPF	Other-ILD	-0.0787299	-0.30071	0.14325	0.786	ns
PLIN2+ Fibroblasts	BSG+/CTSL+	Diagnosis	Control	COPD	-13.3036	-49.9525	23.3454	0.777	ns
PLIN2+ Fibroblasts	BSG+/CTSL+	Diagnosis	Control	IPF	-3.83506	-32.8892	25.2191	0.986	ns
PLIN2+ Fibroblasts	BSG+/CTSL+	Diagnosis	Control	Other-ILD	16.1806	-22.2229	54.584	0.687	ns
PLIN2+ Fibroblasts	BSG+/CTSL+	Diagnosis	COPD	IPF	9.46851	-23.4127	42.3497	0.874	ns
PLIN2+ Fibroblasts	BSG+/CTSL+	Diagnosis	COPD	Other-ILD	29.4841	-11.8904	70.8587	0.249	ns
PLIN2+ Fibroblasts	BSG+/CTSL+	Diagnosis	IPF	Other-ILD	20.0156	-14.8104	54.8416	0.438	ns
PLIN2+ Fibroblasts	HSPA5+/CTSL+	Diagnosis	Control	COPD	-14.881	-52.6494	22.8875	0.73	ns
PLIN2+ Fibroblasts	HSPA5+/CTSL+	Diagnosis	Control	IPF	7.05412	-22.8876	36.9958	0.926	ns
PLIN2+ Fibroblasts	HSPA5+/CTSL+	Diagnosis	Control	Other-ILD	26.9444	-12.6321	66.521	0.287	ns
PLIN2+ Fibroblasts	HSPA5+/CTSL+	Diagnosis	COPD	IPF	21.9351	-11.9505	55.8206	0.331	ns
PLIN2+ Fibroblasts	HSPA5+/CTSL+	Diagnosis	COPD	Other-ILD	41.8254	-0.813013	84.4638	0.0566	ns
PLIN2+ Fibroblasts	HSPA5+/CTSL+	Diagnosis	IPF	Other-ILD	19.8903	-15.9995	55.7802	0.47	ns
PLIN2+ Fibroblasts	NRP1+/CTSL+	Diagnosis	Control	COPD	0.494048	-28.1038	29.0919	1	ns
PLIN2+ Fibroblasts	NRP1+/CTSL+	Diagnosis	Control	IPF	-9.23672	-31.9082	13.4348	0.709	ns
PLIN2+ Fibroblasts	NRP1+/CTSL+	Diagnosis	Control	Other-ILD	-17.125	-47.0919	12.8419	0.443	ns
PLIN2+ Fibroblasts	NRP1+/CTSL+	Diagnosis	COPD	IPF	-9.73077	-35.3885	15.927	0.753	ns
PLIN2+ Fibroblasts	NRP1+/CTSL+	Diagnosis	COPD	Other-ILD	-17.619	-49.9043	14.6663	0.483	ns
PLIN2+ Fibroblasts	NRP1+/CTSL+	Diagnosis	IPF	Other-ILD	-7.88828	-35.0636	19.2871	0.871	ns
PLIN2+ Fibroblasts	ACE2+/FURIN+	Diagnosis	Control	COPD	2.47818e-19	-0.0296522	0.0296522	1	ns
PLIN2+ Fibroblasts	ACE2+/FURIN+	Diagnosis	Control	IPF	0.0083612	-0.0139601	0.0306825	0.751	ns
PLIN2+ Fibroblasts	ACE2+/FURIN+	Diagnosis	Control	Other-ILD	6.81499e-19	-0.0273677	0.0273677	1	ns
PLIN2+ Fibroblasts	ACE2+/FURIN+	Diagnosis	COPD	IPF	0.0083612	-0.0197693	0.0364917	0.858	ns
PLIN2+ Fibroblasts	ACE2+/FURIN+	Diagnosis	COPD	Other-ILD	4.33681e-19	-0.0322812	0.0322812	1	ns
PLIN2+ Fibroblasts	ACE2+/FURIN+	Diagnosis	IPF	Other-ILD	-0.0083612	-0.0340724	0.01735	0.822	ns
PLIN2+ Fibroblasts	BSG+/FURIN+	Diagnosis	Control	COPD	-4.16667	-24.4181	16.0848	0.949	ns
PLIN2+ Fibroblasts	BSG+/FURIN+	Diagnosis	Control	IPF	4.32934	-11.7254	20.3841	0.894	ns
PLIN2+ Fibroblasts	BSG+/FURIN+	Diagnosis	Control	Other-ILD	16.1111	-5.10986	37.3321	0.2	ns
PLIN2+ Fibroblasts	BSG+/FURIN+	Diagnosis	COPD	IPF	8.49601	-9.67344	26.6655	0.612	ns
PLIN2+ Fibroblasts	BSG+/FURIN+	Diagnosis	COPD	Other-ILD	20.2778	-2.58494	43.1405	0.1	ns
PLIN2+ Fibroblasts	BSG+/FURIN+	Diagnosis	IPF	Other-ILD	11.7818	-7.46236	31.0259	0.381	ns
PLIN2+ Fibroblasts	HSPA5+/FURIN+	Diagnosis	Control	COPD	-1.4881	-21.8948	18.9186	0.997	ns
PLIN2+ Fibroblasts	HSPA5+/FURIN+	Diagnosis	Control	IPF	6.45042	-9.72742	22.6283	0.723	ns
PLIN2+ Fibroblasts	HSPA5+/FURIN+	Diagnosis	Control	Other-ILD	17.3611	-4.02258	38.7448	0.152	ns
PLIN2+ Fibroblasts	HSPA5+/FURIN+	Diagnosis	COPD	IPF	7.93851	-10.3703	26.2473	0.667	ns
PLIN2+ Fibroblasts	HSPA5+/FURIN+	Diagnosis	COPD	Other-ILD	18.8492	-4.18882	41.8872	0.147	ns
PLIN2+ Fibroblasts	HSPA5+/FURIN+	Diagnosis	IPF	Other-ILD	10.9107	-8.481	30.3024	0.456	ns
PLIN2+ Fibroblasts	NRP1+/FURIN+	Diagnosis	Control	COPD	-0.452381	-15.8948	14.99	1	ns
PLIN2+ Fibroblasts	NRP1+/FURIN+	Diagnosis	Control	IPF	0.428176	-11.8141	12.6704	1	ns
PLIN2+ Fibroblasts	NRP1+/FURIN+	Diagnosis	Control	Other-ILD	5.42424	-11.2108	22.0593	0.827	ns
PLIN2+ Fibroblasts	NRP1+/FURIN+	Diagnosis	COPD	IPF	0.880557	-12.9742	14.7353	0.998	ns
PLIN2+ Fibroblasts	NRP1+/FURIN+	Diagnosis	COPD	Other-ILD	5.87662	-11.9785	23.7318	0.823	ns
PLIN2+ Fibroblasts	NRP1+/FURIN+	Diagnosis	IPF	Other-ILD	4.99607	-10.1767	20.1688	0.823	ns
PNEC/Ionocytes	BSG+/CTSL+	Diagnosis	Control	COPD	19.281	-14.4325	52.9946	0.441	ns
PNEC/Ionocytes	BSG+/CTSL+	Diagnosis	Control	IPF	31.348	2.42288	60.2732	0.0284	*
PNEC/Ionocytes	BSG+/CTSL+	Diagnosis	Control	Other-ILD	27.5054	-13.0132	68.0241	0.289	ns
PNEC/Ionocytes	BSG+/CTSL+	Diagnosis	COPD	IPF	12.067	-16.8582	40.9922	0.693	ns
PNEC/Ionocytes	BSG+/CTSL+	Diagnosis	COPD	Other-ILD	8.2244	-32.2942	48.743	0.951	ns
PNEC/Ionocytes	BSG+/CTSL+	Diagnosis	IPF	Other-ILD	-3.84259	-40.4735	32.7883	0.993	ns
PNEC/Ionocytes	HSPA5+/CTSL+	Diagnosis	Control	COPD	13.3987	-18.2686	45.066	0.683	ns
PNEC/Ionocytes	HSPA5+/CTSL+	Diagnosis	Control	IPF	23.5703	-3.59932	50.7398	0.112	ns
PNEC/Ionocytes	HSPA5+/CTSL+	Diagnosis	Control	Other-ILD	31.2092	-6.85023	69.2685	0.146	ns
PNEC/Ionocytes	HSPA5+/CTSL+	Diagnosis	COPD	IPF	10.1716	-16.998	37.3412	0.759	ns
PNEC/Ionocytes	HSPA5+/CTSL+	Diagnosis	COPD	Other-ILD	17.8105	-20.2489	55.8698	0.61	ns
PNEC/Ionocytes	HSPA5+/CTSL+	Diagnosis	IPF	Other-ILD	7.63889	-26.7687	42.0465	0.937	ns
PNEC/Ionocytes	NRP1+/CTSL+	Diagnosis	Control	COPD	-7.83687e-16	-18.1746	18.1746	1	ns
PNEC/Ionocytes	NRP1+/CTSL+	Diagnosis	Control	IPF	11.6667	-3.92661	27.2599	0.21	ns
PNEC/Ionocytes	NRP1+/CTSL+	Diagnosis	Control	Other-ILD	1.04492e-16	-21.8432	21.8432	1	ns
PNEC/Ionocytes	NRP1+/CTSL+	Diagnosis	COPD	IPF	11.6667	-3.92661	27.2599	0.21	ns
PNEC/Ionocytes	NRP1+/CTSL+	Diagnosis	COPD	Other-ILD	8.88178e-16	-21.8432	21.8432	1	ns
PNEC/Ionocytes	NRP1+/CTSL+	Diagnosis	IPF	Other-ILD	-11.6667	-31.414	8.08069	0.412	ns
PNEC/Ionocytes	BSG+/FURIN+	Diagnosis	Control	COPD	-8.49673	-37.4026	20.4091	0.867	ns
PNEC/Ionocytes	BSG+/FURIN+	Diagnosis	Control	IPF	-8.05919	-32.8595	16.7412	0.828	ns
PNEC/Ionocytes	BSG+/FURIN+	Diagnosis	Control	Other-ILD	-21.732	-56.4726	13.0085	0.361	ns
PNEC/Ionocytes	BSG+/FURIN+	Diagnosis	COPD	IPF	0.437545	-24.3628	25.2379	1	ns
PNEC/Ionocytes	BSG+/FURIN+	Diagnosis	COPD	Other-ILD	-13.2353	-47.9758	21.5052	0.749	ns
PNEC/Ionocytes	BSG+/FURIN+	Diagnosis	IPF	Other-ILD	-13.6728	-45.0801	17.7344	0.664	ns
PNEC/Ionocytes	HSPA5+/FURIN+	Diagnosis	Control	COPD	-16.9935	-41.939	7.95212	0.286	ns
PNEC/Ionocytes	HSPA5+/FURIN+	Diagnosis	Control	IPF	-2.53268	-23.9352	18.8699	0.989	ns
PNEC/Ionocytes	HSPA5+/FURIN+	Diagnosis	Control	Other-ILD	-17.8105	-47.7913	12.1704	0.407	ns
PNEC/Ionocytes	HSPA5+/FURIN+	Diagnosis	COPD	IPF	14.4608	-6.94176	35.8633	0.293	ns
PNEC/Ionocytes	HSPA5+/FURIN+	Diagnosis	COPD	Other-ILD	-0.816993	-30.7979	29.1639	1	ns
PNEC/Ionocytes	HSPA5+/FURIN+	Diagnosis	IPF	Other-ILD	-15.2778	-42.382	11.8264	0.454	ns
PNEC/Ionocytes	NRP1+/FURIN+	Diagnosis	Control	COPD	-1.96078	-8.38408	4.46251	0.853	ns
PNEC/Ionocytes	NRP1+/FURIN+	Diagnosis	Control	IPF	-0.0163399	-5.52733	5.49465	1	ns
PNEC/Ionocytes	NRP1+/FURIN+	Diagnosis	Control	Other-ILD	-1.96078	-9.68062	5.75905	0.909	ns
PNEC/Ionocytes	NRP1+/FURIN+	Diagnosis	COPD	IPF	1.94444	-3.56654	7.45543	0.79	ns
PNEC/Ionocytes	NRP1+/FURIN+	Diagnosis	COPD	Other-ILD	-4.44089e-16	-7.71984	7.71984	1	ns
PNEC/Ionocytes	NRP1+/FURIN+	Diagnosis	IPF	Other-ILD	-1.94444	-8.92357	5.03468	0.884	ns
PNECs	BSG+/TMPRSS2+	Diagnosis	Control	COPD	-3.6796e-15	-19.0307	19.0307	1	ns
PNECs	BSG+/TMPRSS2+	Diagnosis	Control	IPF	12.8788	-4.89969	30.6573	0.231	ns
PNECs	BSG+/TMPRSS2+	Diagnosis	Control	Other-ILD	-1.01506e-15	-29.4823	29.4823	1	ns
PNECs	BSG+/TMPRSS2+	Diagnosis	COPD	IPF	12.8788	-4.20717	29.9647	0.201	ns
PNECs	BSG+/TMPRSS2+	Diagnosis	COPD	Other-ILD	2.66454e-15	-29.0699	29.0699	1	ns
PNECs	BSG+/TMPRSS2+	Diagnosis	IPF	Other-ILD	-12.8788	-41.1448	15.3872	0.624	ns
PNECs	NRP1+/TMPRSS2+	Diagnosis	Control	COPD	2.79142e-15	-18.3879	18.3879	1	ns
PNECs	NRP1+/TMPRSS2+	Diagnosis	Control	IPF	10.6061	-6.57191	27.784	0.366	ns
PNECs	NRP1+/TMPRSS2+	Diagnosis	Control	Other-ILD	1.26883e-16	-28.4864	28.4864	1	ns
PNECs	NRP1+/TMPRSS2+	Diagnosis	COPD	IPF	10.6061	-5.90278	27.1149	0.331	ns
PNECs	NRP1+/TMPRSS2+	Diagnosis	COPD	Other-ILD	-2.66454e-15	-28.088	28.088	1	ns
PNECs	NRP1+/TMPRSS2+	Diagnosis	IPF	Other-ILD	-10.6061	-37.9173	16.7052	0.732	ns
Proliferating Macrophages	ACE2+/CTSL+	Diagnosis	Control	COPD	0	-0.122331	0.122331	1	ns
Proliferating Macrophages	ACE2+/CTSL+	Diagnosis	Control	IPF	0.030303	-0.0466738	0.10728	0.731	ns
Proliferating Macrophages	ACE2+/CTSL+	Diagnosis	Control	Other-ILD	1.37332e-18	-0.0826926	0.0826926	1	ns
Proliferating Macrophages	ACE2+/CTSL+	Diagnosis	COPD	IPF	0.030303	-0.0876234	0.148229	0.907	ns
Proliferating Macrophages	ACE2+/CTSL+	Diagnosis	COPD	Other-ILD	1.37332e-18	-0.121734	0.121734	1	ns
Proliferating Macrophages	ACE2+/CTSL+	Diagnosis	IPF	Other-ILD	-0.030303	-0.106329	0.0457229	0.724	ns
Proliferating Macrophages	BSG+/CTSL+	Diagnosis	Control	COPD	-1.30683	-27.3801	24.7664	0.999	ns
Proliferating Macrophages	BSG+/CTSL+	Diagnosis	Control	IPF	9.84171	-4.48403	24.1674	0.284	ns
Proliferating Macrophages	BSG+/CTSL+	Diagnosis	Control	Other-ILD	17.575	1.56375	33.5863	0.0254	*
Proliferating Macrophages	BSG+/CTSL+	Diagnosis	COPD	IPF	11.1485	-14.2154	36.5125	0.663	ns
Proliferating Macrophages	BSG+/CTSL+	Diagnosis	COPD	Other-ILD	18.8818	-7.47082	45.2345	0.248	ns
Proliferating Macrophages	BSG+/CTSL+	Diagnosis	IPF	Other-ILD	7.73331	-7.09491	22.5615	0.528	ns
Proliferating Macrophages	HSPA5+/CTSL+	Diagnosis	Control	COPD	26.3127	2.26484	50.3606	0.026	*
Proliferating Macrophages	HSPA5+/CTSL+	Diagnosis	Control	IPF	10.415	-2.79787	23.628	0.175	ns
Proliferating Macrophages	HSPA5+/CTSL+	Diagnosis	Control	Other-ILD	13.5934	-1.17411	28.3609	0.0829	ns
Proliferating Macrophages	HSPA5+/CTSL+	Diagnosis	COPD	IPF	-15.8977	-39.2913	7.496	0.293	ns
Proliferating Macrophages	HSPA5+/CTSL+	Diagnosis	COPD	Other-ILD	-12.7193	-37.0249	11.5863	0.525	ns
Proliferating Macrophages	HSPA5+/CTSL+	Diagnosis	IPF	Other-ILD	3.17836	-10.498	16.8547	0.93	ns
Proliferating Macrophages	NRP1+/CTSL+	Diagnosis	Control	COPD	9.27845	-6.34859	24.9055	0.413	ns
Proliferating Macrophages	NRP1+/CTSL+	Diagnosis	Control	IPF	4.87555	-3.71061	13.4617	0.454	ns
Proliferating Macrophages	NRP1+/CTSL+	Diagnosis	Control	Other-ILD	5.07676	-4.51962	14.6731	0.516	ns
Proliferating Macrophages	NRP1+/CTSL+	Diagnosis	COPD	IPF	-4.4029	-19.6048	10.799	0.875	ns
Proliferating Macrophages	NRP1+/CTSL+	Diagnosis	COPD	Other-ILD	-4.20169	-19.9962	11.5928	0.9	ns
Proliferating Macrophages	NRP1+/CTSL+	Diagnosis	IPF	Other-ILD	0.20121	-8.68611	9.08853	1	ns
Proliferating Macrophages	ACE2+/FURIN+	Diagnosis	Control	COPD	4.25007e-18	-0.175784	0.175784	1	ns
Proliferating Macrophages	ACE2+/FURIN+	Diagnosis	Control	IPF	0.037037	-0.0576457	0.13172	0.732	ns
Proliferating Macrophages	ACE2+/FURIN+	Diagnosis	Control	Other-ILD	-9.54098e-19	-0.10427	0.10427	1	ns
Proliferating Macrophages	ACE2+/FURIN+	Diagnosis	COPD	IPF	0.037037	-0.134907	0.208981	0.941	ns
Proliferating Macrophages	ACE2+/FURIN+	Diagnosis	COPD	Other-ILD	-5.20417e-18	-0.177404	0.177404	1	ns
Proliferating Macrophages	ACE2+/FURIN+	Diagnosis	IPF	Other-ILD	-0.037037	-0.134695	0.0606207	0.75	ns
Proliferating Macrophages	BSG+/FURIN+	Diagnosis	Control	COPD	-4.87087	-16.039	6.2973	0.668	ns
Proliferating Macrophages	BSG+/FURIN+	Diagnosis	Control	IPF	-0.142968	-6.27923	5.99329	1	ns
Proliferating Macrophages	BSG+/FURIN+	Diagnosis	Control	Other-ILD	4.5528	-2.30544	11.411	0.313	ns
Proliferating Macrophages	BSG+/FURIN+	Diagnosis	COPD	IPF	4.7279	-6.13644	15.5922	0.67	ns
Proliferating Macrophages	BSG+/FURIN+	Diagnosis	COPD	Other-ILD	9.42367	-1.86419	20.7115	0.136	ns
Proliferating Macrophages	BSG+/FURIN+	Diagnosis	IPF	Other-ILD	4.69577	-1.65572	11.0473	0.223	ns
Proliferating Macrophages	HSPA5+/FURIN+	Diagnosis	Control	COPD	-6.27482	-18.8496	6.29999	0.565	ns
Proliferating Macrophages	HSPA5+/FURIN+	Diagnosis	Control	IPF	-2.25999	-9.16912	4.64915	0.83	ns
Proliferating Macrophages	HSPA5+/FURIN+	Diagnosis	Control	Other-ILD	-1.58523	-9.30728	6.13682	0.951	ns
Proliferating Macrophages	HSPA5+/FURIN+	Diagnosis	COPD	IPF	4.01484	-8.21789	16.2476	0.828	ns
Proliferating Macrophages	HSPA5+/FURIN+	Diagnosis	COPD	Other-ILD	4.68959	-8.01999	17.3992	0.772	ns
Proliferating Macrophages	HSPA5+/FURIN+	Diagnosis	IPF	Other-ILD	0.674757	-6.47672	7.82623	0.995	ns
Proliferating Macrophages	NRP1+/FURIN+	Diagnosis	Control	COPD	-2.36871	-9.36023	4.6228	0.814	ns
Proliferating Macrophages	NRP1+/FURIN+	Diagnosis	Control	IPF	-1.28135	-5.12279	2.56008	0.821	ns
Proliferating Macrophages	NRP1+/FURIN+	Diagnosis	Control	Other-ILD	0.117347	-4.17606	4.41076	1	ns
Proliferating Macrophages	NRP1+/FURIN+	Diagnosis	COPD	IPF	1.08736	-5.71396	7.88868	0.976	ns
Proliferating Macrophages	NRP1+/FURIN+	Diagnosis	COPD	Other-ILD	2.48606	-4.58038	9.55251	0.796	ns
Proliferating Macrophages	NRP1+/FURIN+	Diagnosis	IPF	Other-ILD	1.3987	-2.57748	5.37487	0.796	ns
Proliferating Macrophages	BSG+/TMPRSS2+	Diagnosis	Control	COPD	0.321709	-1.19749	1.84091	0.946	ns
Proliferating Macrophages	BSG+/TMPRSS2+	Diagnosis	Control	IPF	0.110641	-0.728801	0.950082	0.986	ns
Proliferating Macrophages	BSG+/TMPRSS2+	Diagnosis	Control	Other-ILD	0.297164	-0.639537	1.23386	0.842	ns
Proliferating Macrophages	BSG+/TMPRSS2+	Diagnosis	COPD	IPF	-0.211069	-1.6853	1.26317	0.982	ns
Proliferating Macrophages	BSG+/TMPRSS2+	Diagnosis	COPD	Other-ILD	-0.0245456	-1.55625	1.50716	1	ns
Proliferating Macrophages	BSG+/TMPRSS2+	Diagnosis	IPF	Other-ILD	0.186523	-0.675341	1.04839	0.943	ns
Proliferating Macrophages	NRP1+/TMPRSS2+	Diagnosis	Control	COPD	-0.440917	-1.81463	0.932796	0.837	ns
Proliferating Macrophages	NRP1+/TMPRSS2+	Diagnosis	Control	IPF	-0.154232	-0.966443	0.65798	0.96	ns
Proliferating Macrophages	NRP1+/TMPRSS2+	Diagnosis	Control	Other-ILD	-0.386532	-1.27831	0.505248	0.672	ns
Proliferating Macrophages	NRP1+/TMPRSS2+	Diagnosis	COPD	IPF	0.286686	-1.01105	1.58442	0.939	ns
Proliferating Macrophages	NRP1+/TMPRSS2+	Diagnosis	COPD	Other-ILD	0.0543848	-1.29457	1.40334	1	ns
Proliferating Macrophages	NRP1+/TMPRSS2+	Diagnosis	IPF	Other-ILD	-0.232301	-1.00191	0.537304	0.86	ns
Proliferating T Cells	BSG+/CTSL+	Diagnosis	Control	COPD	-3.13331	-15.2286	8.96194	0.907	ns
Proliferating T Cells	BSG+/CTSL+	Diagnosis	Control	IPF	0.79301	-8.87708	10.4631	0.997	ns
Proliferating T Cells	BSG+/CTSL+	Diagnosis	Control	Other-ILD	5.88472	-7.12555	18.895	0.644	ns
Proliferating T Cells	BSG+/CTSL+	Diagnosis	COPD	IPF	3.92632	-6.82898	14.6816	0.779	ns
Proliferating T Cells	BSG+/CTSL+	Diagnosis	COPD	Other-ILD	9.01803	-4.8179	22.854	0.331	ns
Proliferating T Cells	BSG+/CTSL+	Diagnosis	IPF	Other-ILD	5.09171	-6.6832	16.8666	0.676	ns
Proliferating T Cells	HSPA5+/CTSL+	Diagnosis	Control	COPD	-2.21575	-13.2603	8.82882	0.954	ns
Proliferating T Cells	HSPA5+/CTSL+	Diagnosis	Control	IPF	-0.205189	-9.03526	8.62488	1	ns
Proliferating T Cells	HSPA5+/CTSL+	Diagnosis	Control	Other-ILD	2.90176	-8.97834	14.7819	0.921	ns
Proliferating T Cells	HSPA5+/CTSL+	Diagnosis	COPD	IPF	2.01056	-7.81046	11.8316	0.951	ns
Proliferating T Cells	HSPA5+/CTSL+	Diagnosis	COPD	Other-ILD	5.11751	-7.51653	17.7515	0.719	ns
Proliferating T Cells	HSPA5+/CTSL+	Diagnosis	IPF	Other-ILD	3.10695	-7.6451	13.859	0.876	ns
Proliferating T Cells	NRP1+/CTSL+	Diagnosis	Control	COPD	3.33067e-16	-2.63628	2.63628	1	ns
Proliferating T Cells	NRP1+/CTSL+	Diagnosis	Control	IPF	0.969411	-1.13828	3.0771	0.631	ns
Proliferating T Cells	NRP1+/CTSL+	Diagnosis	Control	Other-ILD	0.197628	-2.63809	3.03335	0.998	ns
Proliferating T Cells	NRP1+/CTSL+	Diagnosis	COPD	IPF	0.969411	-1.37481	3.31364	0.706	ns
Proliferating T Cells	NRP1+/CTSL+	Diagnosis	COPD	Other-ILD	0.197628	-2.81805	3.21331	0.998	ns
Proliferating T Cells	NRP1+/CTSL+	Diagnosis	IPF	Other-ILD	-0.771782	-3.33824	1.79468	0.863	ns
Proliferating T Cells	BSG+/FURIN+	Diagnosis	Control	COPD	-4.38454	-18.9843	10.2152	0.864	ns
Proliferating T Cells	BSG+/FURIN+	Diagnosis	Control	IPF	-0.474751	-12.1472	11.1977	1	ns
Proliferating T Cells	BSG+/FURIN+	Diagnosis	Control	Other-ILD	-2.90265	-18.6069	12.8016	0.963	ns
Proliferating T Cells	BSG+/FURIN+	Diagnosis	COPD	IPF	3.90979	-9.07259	16.8922	0.863	ns
Proliferating T Cells	BSG+/FURIN+	Diagnosis	COPD	Other-ILD	1.4819	-15.219	18.1828	0.996	ns
Proliferating T Cells	BSG+/FURIN+	Diagnosis	IPF	Other-ILD	-2.42789	-16.641	11.7852	0.971	ns
Proliferating T Cells	HSPA5+/FURIN+	Diagnosis	Control	COPD	-0.648349	-14.1477	12.851	0.999	ns
Proliferating T Cells	HSPA5+/FURIN+	Diagnosis	Control	IPF	0.606335	-10.1863	11.399	0.999	ns
Proliferating T Cells	HSPA5+/FURIN+	Diagnosis	Control	Other-ILD	-2.14835	-16.669	12.3723	0.981	ns
Proliferating T Cells	HSPA5+/FURIN+	Diagnosis	COPD	IPF	1.25468	-10.7492	13.2586	0.993	ns
Proliferating T Cells	HSPA5+/FURIN+	Diagnosis	COPD	Other-ILD	-1.5	-16.9421	13.9421	0.994	ns
Proliferating T Cells	HSPA5+/FURIN+	Diagnosis	IPF	Other-ILD	-2.75469	-15.8965	10.3872	0.948	ns
Proliferating T Cells	NRP1+/FURIN+	Diagnosis	Control	COPD	-8.21711e-18	-0.268106	0.268106	1	ns
Proliferating T Cells	NRP1+/FURIN+	Diagnosis	Control	IPF	0.0701754	-0.144174	0.284525	0.83	ns
Proliferating T Cells	NRP1+/FURIN+	Diagnosis	Control	Other-ILD	5.66068e-18	-0.288389	0.288389	1	ns
Proliferating T Cells	NRP1+/FURIN+	Diagnosis	COPD	IPF	0.0701754	-0.168229	0.30858	0.87	ns
Proliferating T Cells	NRP1+/FURIN+	Diagnosis	COPD	Other-ILD	1.38778e-17	-0.306691	0.306691	1	ns
Proliferating T Cells	NRP1+/FURIN+	Diagnosis	IPF	Other-ILD	-0.0701754	-0.331181	0.19083	0.898	ns
Proliferating T Cells	BSG+/TMPRSS2+	Diagnosis	Control	COPD	-0.0299043	-2.87549	2.81569	1	ns
Proliferating T Cells	BSG+/TMPRSS2+	Diagnosis	Control	IPF	1.12565	-1.14938	3.40069	0.574	ns
Proliferating T Cells	BSG+/TMPRSS2+	Diagnosis	Control	Other-ILD	-0.0299043	-3.09077	3.03096	1	ns
Proliferating T Cells	BSG+/TMPRSS2+	Diagnosis	COPD	IPF	1.15556	-1.37479	3.6859	0.637	ns
Proliferating T Cells	BSG+/TMPRSS2+	Diagnosis	COPD	Other-ILD	1.11022e-16	-3.25511	3.25511	1	ns
Proliferating T Cells	BSG+/TMPRSS2+	Diagnosis	IPF	Other-ILD	-1.15556	-3.92578	1.61467	0.7	ns
SCGB3A2+	ACE2+/TMPRSS2+	Diagnosis	Control	COPD	-0.165913	-1.58392	1.25209	0.99	ns
SCGB3A2+	ACE2+/TMPRSS2+	Diagnosis	Control	IPF	0.409644	-0.622107	1.4414	0.729	ns
SCGB3A2+	ACE2+/TMPRSS2+	Diagnosis	Control	Other-ILD	1.24933	-0.00932612	2.50799	0.0525	ns
SCGB3A2+	ACE2+/TMPRSS2+	Diagnosis	COPD	IPF	0.575557	-0.741546	1.89266	0.666	ns
SCGB3A2+	ACE2+/TMPRSS2+	Diagnosis	COPD	Other-ILD	1.41525	-0.086244	2.91673	0.0723	ns
SCGB3A2+	ACE2+/TMPRSS2+	Diagnosis	IPF	Other-ILD	0.839688	-0.304094	1.98347	0.228	ns
SCGB3A2+	BSG+/TMPRSS2+	Diagnosis	Control	COPD	-8.63665	-22.2287	4.95535	0.355	ns
SCGB3A2+	BSG+/TMPRSS2+	Diagnosis	Control	IPF	-0.0684095	-10.0215	9.88472	1	ns
SCGB3A2+	BSG+/TMPRSS2+	Diagnosis	Control	Other-ILD	3.73107	-9.28228	16.7444	0.88	ns
SCGB3A2+	BSG+/TMPRSS2+	Diagnosis	COPD	IPF	8.56824	-4.10636	21.2428	0.3	ns
SCGB3A2+	BSG+/TMPRSS2+	Diagnosis	COPD	Other-ILD	12.3677	-2.82859	27.564	0.154	ns
SCGB3A2+	BSG+/TMPRSS2+	Diagnosis	IPF	Other-ILD	3.79948	-8.25251	15.8515	0.847	ns
SCGB3A2+	NRP1+/TMPRSS2+	Diagnosis	Control	COPD	-1.48034	-7.52278	4.5621	0.921	ns
SCGB3A2+	NRP1+/TMPRSS2+	Diagnosis	Control	IPF	2.85028	-1.72742	7.42798	0.373	ns
SCGB3A2+	NRP1+/TMPRSS2+	Diagnosis	Control	Other-ILD	-1.69855	-7.50149	4.10438	0.873	ns
SCGB3A2+	NRP1+/TMPRSS2+	Diagnosis	COPD	IPF	4.33062	-1.13165	9.79289	0.172	ns
SCGB3A2+	NRP1+/TMPRSS2+	Diagnosis	COPD	Other-ILD	-0.218215	-6.74164	6.30521	1	ns
SCGB3A2+	NRP1+/TMPRSS2+	Diagnosis	IPF	Other-ILD	-4.54883	-9.74492	0.647263	0.109	ns
SCGB3A2+/SCGB1A1+	ACE2+/TMPRSS2+	Diagnosis	Control	COPD	0.0462963	-1.90805	2.00065	1	ns
SCGB3A2+/SCGB1A1+	ACE2+/TMPRSS2+	Diagnosis	Control	IPF	1.21814	-0.252159	2.68844	0.141	ns
SCGB3A2+/SCGB1A1+	ACE2+/TMPRSS2+	Diagnosis	Control	Other-ILD	0.455336	-1.34284	2.25351	0.912	ns
SCGB3A2+/SCGB1A1+	ACE2+/TMPRSS2+	Diagnosis	COPD	IPF	1.17184	-0.635139	2.97882	0.333	ns
SCGB3A2+/SCGB1A1+	ACE2+/TMPRSS2+	Diagnosis	COPD	Other-ILD	0.409039	-1.67347	2.49154	0.956	ns
SCGB3A2+/SCGB1A1+	ACE2+/TMPRSS2+	Diagnosis	IPF	Other-ILD	-0.762803	-2.3996	0.874	0.618	ns
SCGB3A2+/SCGB1A1+	BSG+/TMPRSS2+	Diagnosis	Control	COPD	6.21546	-9.15635	21.5873	0.721	ns
SCGB3A2+/SCGB1A1+	BSG+/TMPRSS2+	Diagnosis	Control	IPF	11.9536	0.458636	23.4485	0.0381	*
SCGB3A2+/SCGB1A1+	BSG+/TMPRSS2+	Diagnosis	Control	Other-ILD	6.58828	-8.61028	21.7868	0.676	ns
SCGB3A2+/SCGB1A1+	BSG+/TMPRSS2+	Diagnosis	COPD	IPF	5.73812	-8.51044	19.9867	0.724	ns
SCGB3A2+/SCGB1A1+	BSG+/TMPRSS2+	Diagnosis	COPD	Other-ILD	0.372821	-17.002	17.7476	1	ns
SCGB3A2+/SCGB1A1+	BSG+/TMPRSS2+	Diagnosis	IPF	Other-ILD	-5.3653	-19.4268	8.69618	0.756	ns
SCGB3A2+/SCGB1A1+	NRP1+/TMPRSS2+	Diagnosis	Control	COPD	3.35732	-6.94389	13.6585	0.833	ns
SCGB3A2+/SCGB1A1+	NRP1+/TMPRSS2+	Diagnosis	Control	IPF	9.49297	1.4782	17.5077	0.013	*
SCGB3A2+/SCGB1A1+	NRP1+/TMPRSS2+	Diagnosis	Control	Other-ILD	1.14408	-9.15714	11.4453	0.992	ns
SCGB3A2+/SCGB1A1+	NRP1+/TMPRSS2+	Diagnosis	COPD	IPF	6.13565	-3.14018	15.4115	0.319	ns
SCGB3A2+/SCGB1A1+	NRP1+/TMPRSS2+	Diagnosis	COPD	Other-ILD	-2.21325	-13.5234	9.0969	0.957	ns
SCGB3A2+/SCGB1A1+	NRP1+/TMPRSS2+	Diagnosis	IPF	Other-ILD	-8.3489	-17.6247	0.926937	0.0942	ns
Smooth Muscle Cells	BSG+/CTSL+	Diagnosis	Control	COPD	-5.84022	-25.3144	13.634	0.864	ns
Smooth Muscle Cells	BSG+/CTSL+	Diagnosis	Control	IPF	2.63396	-10.879	16.1469	0.958	ns
Smooth Muscle Cells	BSG+/CTSL+	Diagnosis	Control	Other-ILD	13.0333	-5.31795	31.3846	0.257	ns
Smooth Muscle Cells	BSG+/CTSL+	Diagnosis	COPD	IPF	8.47418	-9.80962	26.758	0.626	ns
Smooth Muscle Cells	BSG+/CTSL+	Diagnosis	COPD	Other-ILD	18.8736	-3.22775	40.9749	0.123	ns
Smooth Muscle Cells	BSG+/CTSL+	Diagnosis	IPF	Other-ILD	10.3994	-6.68343	27.4822	0.393	ns
Smooth Muscle Cells	HSPA5+/CTSL+	Diagnosis	Control	COPD	-10.4511	-29.7494	8.84726	0.498	ns
Smooth Muscle Cells	HSPA5+/CTSL+	Diagnosis	Control	IPF	-0.669301	-14.0602	12.7216	0.999	ns
Smooth Muscle Cells	HSPA5+/CTSL+	Diagnosis	Control	Other-ILD	8.09474	-10.0908	26.2803	0.656	ns
Smooth Muscle Cells	HSPA5+/CTSL+	Diagnosis	COPD	IPF	9.78178	-8.3369	27.9005	0.501	ns
Smooth Muscle Cells	HSPA5+/CTSL+	Diagnosis	COPD	Other-ILD	18.5458	-3.35589	40.4475	0.128	ns
Smooth Muscle Cells	HSPA5+/CTSL+	Diagnosis	IPF	Other-ILD	8.76404	-8.16448	25.6926	0.537	ns
Smooth Muscle Cells	NRP1+/CTSL+	Diagnosis	Control	COPD	-3.36507	-14.5247	7.79453	0.862	ns
Smooth Muscle Cells	NRP1+/CTSL+	Diagnosis	Control	IPF	1.51964	-6.2421	9.28138	0.957	ns
Smooth Muscle Cells	NRP1+/CTSL+	Diagnosis	Control	Other-ILD	-2.76597	-13.2821	7.75014	0.904	ns
Smooth Muscle Cells	NRP1+/CTSL+	Diagnosis	COPD	IPF	4.88471	-5.6062	15.3756	0.623	ns
Smooth Muscle Cells	NRP1+/CTSL+	Diagnosis	COPD	Other-ILD	0.599099	-12.0659	13.2641	0.999	ns
Smooth Muscle Cells	NRP1+/CTSL+	Diagnosis	IPF	Other-ILD	-4.28561	-14.0892	5.51802	0.669	ns
Smooth Muscle Cells	BSG+/FURIN+	Diagnosis	Control	COPD	-1.06978	-8.84255	6.703	0.984	ns
Smooth Muscle Cells	BSG+/FURIN+	Diagnosis	Control	IPF	-2.25901	-7.65245	3.13443	0.698	ns
Smooth Muscle Cells	BSG+/FURIN+	Diagnosis	Control	Other-ILD	2.81799	-4.50658	10.1426	0.751	ns
Smooth Muscle Cells	BSG+/FURIN+	Diagnosis	COPD	IPF	-1.18923	-8.48688	6.10841	0.975	ns
Smooth Muscle Cells	BSG+/FURIN+	Diagnosis	COPD	Other-ILD	3.88777	-4.93356	12.7091	0.663	ns
Smooth Muscle Cells	BSG+/FURIN+	Diagnosis	IPF	Other-ILD	5.077	-1.74128	11.8953	0.219	ns
Smooth Muscle Cells	HSPA5+/FURIN+	Diagnosis	Control	COPD	-0.0211849	-5.72426	5.68189	1	ns
Smooth Muscle Cells	HSPA5+/FURIN+	Diagnosis	Control	IPF	0.167972	-3.80254	4.13848	1	ns
Smooth Muscle Cells	HSPA5+/FURIN+	Diagnosis	Control	Other-ILD	4.13469	-1.24163	9.51102	0.194	ns
Smooth Muscle Cells	HSPA5+/FURIN+	Diagnosis	COPD	IPF	0.189157	-5.14865	5.52696	1	ns
Smooth Muscle Cells	HSPA5+/FURIN+	Diagnosis	COPD	Other-ILD	4.15588	-2.29641	10.6082	0.342	ns
Smooth Muscle Cells	HSPA5+/FURIN+	Diagnosis	IPF	Other-ILD	3.96672	-1.02046	8.9539	0.169	ns
Smooth Muscle Cells	NRP1+/FURIN+	Diagnosis	Control	COPD	-2.95721	-8.54509	2.63067	0.518	ns
Smooth Muscle Cells	NRP1+/FURIN+	Diagnosis	Control	IPF	-2.60327	-6.48976	1.28322	0.307	ns
Smooth Muscle Cells	NRP1+/FURIN+	Diagnosis	Control	Other-ILD	-1.68934	-7.02716	3.64847	0.844	ns
Smooth Muscle Cells	NRP1+/FURIN+	Diagnosis	COPD	IPF	0.353945	-4.89911	5.607	0.998	ns
Smooth Muscle Cells	NRP1+/FURIN+	Diagnosis	COPD	Other-ILD	1.26787	-5.13385	7.66959	0.956	ns
Smooth Muscle Cells	NRP1+/FURIN+	Diagnosis	IPF	Other-ILD	0.913924	-4.0723	5.90015	0.964	ns
Smooth Muscle Cells	BSG+/TMPRSS2+	Diagnosis	Control	COPD	0.575674	-0.283752	1.4351	0.307	ns
Smooth Muscle Cells	BSG+/TMPRSS2+	Diagnosis	Control	IPF	-0.114131	-0.712468	0.484207	0.96	ns
Smooth Muscle Cells	BSG+/TMPRSS2+	Diagnosis	Control	Other-ILD	-0.173611	-0.983798	0.636576	0.945	ns
Smooth Muscle Cells	BSG+/TMPRSS2+	Diagnosis	COPD	IPF	-0.689805	-1.49419	0.114577	0.121	ns
Smooth Muscle Cells	BSG+/TMPRSS2+	Diagnosis	COPD	Other-ILD	-0.749285	-1.72162	0.223045	0.192	ns
Smooth Muscle Cells	BSG+/TMPRSS2+	Diagnosis	IPF	Other-ILD	-0.0594806	-0.811025	0.692064	0.997	ns
Smooth Muscle Cells	NRP1+/TMPRSS2+	Diagnosis	Control	COPD	3.80793e-18	-0.10697	0.10697	1	ns
Smooth Muscle Cells	NRP1+/TMPRSS2+	Diagnosis	Control	IPF	0.0248201	-0.0519075	0.101548	0.835	ns
Smooth Muscle Cells	NRP1+/TMPRSS2+	Diagnosis	Control	Other-ILD	3.80793e-18	-0.102453	0.102453	1	ns
Smooth Muscle Cells	NRP1+/TMPRSS2+	Diagnosis	COPD	IPF	0.0248201	-0.0730485	0.122689	0.912	ns
Smooth Muscle Cells	NRP1+/TMPRSS2+	Diagnosis	COPD	Other-ILD	0	-0.119112	0.119112	1	ns
Smooth Muscle Cells	NRP1+/TMPRSS2+	Diagnosis	IPF	Other-ILD	-0.0248201	-0.117731	0.0680906	0.899	ns
T Cells	ACE2+/CTSL+	Diagnosis	Control	COPD	-0.00610791	-0.0500683	0.0378525	0.984	ns
T Cells	ACE2+/CTSL+	Diagnosis	Control	IPF	0.00491502	-0.0269971	0.0368272	0.978	ns
T Cells	ACE2+/CTSL+	Diagnosis	Control	Other-ILD	-0.00610791	-0.0515409	0.0393251	0.985	ns
T Cells	ACE2+/CTSL+	Diagnosis	COPD	IPF	0.0110229	-0.0304327	0.0524786	0.901	ns
T Cells	ACE2+/CTSL+	Diagnosis	COPD	Other-ILD	-1.73472e-18	-0.052577	0.052577	1	ns
T Cells	ACE2+/CTSL+	Diagnosis	IPF	Other-ILD	-0.0110229	-0.054037	0.0319911	0.91	ns
T Cells	BSG+/CTSL+	Diagnosis	Control	COPD	-3.89179	-10.8232	3.03961	0.468	ns
T Cells	BSG+/CTSL+	Diagnosis	Control	IPF	0.310468	-4.81687	5.4378	0.999	ns
T Cells	BSG+/CTSL+	Diagnosis	Control	Other-ILD	8.89	1.45138	16.3286	0.0119	*
T Cells	BSG+/CTSL+	Diagnosis	COPD	IPF	4.20226	-2.41924	10.8238	0.357	ns
T Cells	BSG+/CTSL+	Diagnosis	COPD	Other-ILD	12.7818	4.24436	21.3192	0.000801	***
T Cells	BSG+/CTSL+	Diagnosis	IPF	Other-ILD	8.57953	1.4288	15.7303	0.0114	*
T Cells	HSPA5+/CTSL+	Diagnosis	Control	COPD	-6.75234	-14.2885	0.783847	0.0967	ns
T Cells	HSPA5+/CTSL+	Diagnosis	Control	IPF	-2.98742	-8.56213	2.58729	0.509	ns
T Cells	HSPA5+/CTSL+	Diagnosis	Control	Other-ILD	1.96052	-6.12714	10.0482	0.923	ns
T Cells	HSPA5+/CTSL+	Diagnosis	COPD	IPF	3.76492	-3.43432	10.9642	0.53	ns
T Cells	HSPA5+/CTSL+	Diagnosis	COPD	Other-ILD	8.71286	-0.569486	17.9952	0.0745	ns
T Cells	HSPA5+/CTSL+	Diagnosis	IPF	Other-ILD	4.94794	-2.82672	12.7226	0.354	ns
T Cells	NRP1+/CTSL+	Diagnosis	Control	COPD	-0.134968	-1.08254	0.812604	0.983	ns
T Cells	NRP1+/CTSL+	Diagnosis	Control	IPF	-0.309733	-1.01219	0.392726	0.664	ns
T Cells	NRP1+/CTSL+	Diagnosis	Control	Other-ILD	-0.565441	-1.58235	0.451472	0.476	ns
T Cells	NRP1+/CTSL+	Diagnosis	COPD	IPF	-0.174765	-1.08115	0.731615	0.959	ns
T Cells	NRP1+/CTSL+	Diagnosis	COPD	Other-ILD	-0.430473	-1.5976	0.736654	0.775	ns
T Cells	NRP1+/CTSL+	Diagnosis	IPF	Other-ILD	-0.255708	-1.23435	0.722936	0.906	ns
T Cells	ACE2+/FURIN+	Diagnosis	Control	COPD	0.0203657	-0.0429782	0.0837095	0.835	ns
T Cells	ACE2+/FURIN+	Diagnosis	Control	IPF	0.00052758	-0.0475939	0.0486491	1	ns
T Cells	ACE2+/FURIN+	Diagnosis	Control	Other-ILD	-0.0115221	-0.0778431	0.054799	0.969	ns
T Cells	ACE2+/FURIN+	Diagnosis	COPD	IPF	-0.0198381	-0.0807294	0.0410532	0.83	ns
T Cells	ACE2+/FURIN+	Diagnosis	COPD	Other-ILD	-0.0318878	-0.107983	0.0442079	0.694	ns
T Cells	ACE2+/FURIN+	Diagnosis	IPF	Other-ILD	-0.0120496	-0.0760323	0.0519331	0.961	ns
T Cells	BSG+/FURIN+	Diagnosis	Control	COPD	-1.78573	-7.24427	3.67281	0.832	ns
T Cells	BSG+/FURIN+	Diagnosis	Control	IPF	-1.64469	-5.68251	2.39313	0.718	ns
T Cells	BSG+/FURIN+	Diagnosis	Control	Other-ILD	2.00345	-3.85453	7.86143	0.813	ns
T Cells	BSG+/FURIN+	Diagnosis	COPD	IPF	0.141045	-5.07344	5.35553	1	ns
T Cells	BSG+/FURIN+	Diagnosis	COPD	Other-ILD	3.78918	-2.93412	10.5125	0.464	ns
T Cells	BSG+/FURIN+	Diagnosis	IPF	Other-ILD	3.64814	-1.98313	9.2794	0.338	ns
T Cells	HSPA5+/FURIN+	Diagnosis	Control	COPD	-1.1551	-3.69127	1.38107	0.641	ns
T Cells	HSPA5+/FURIN+	Diagnosis	Control	IPF	-0.473467	-2.35303	1.4061	0.915	ns
T Cells	HSPA5+/FURIN+	Diagnosis	Control	Other-ILD	-0.72272	-3.44367	1.99823	0.902	ns
T Cells	HSPA5+/FURIN+	Diagnosis	COPD	IPF	0.681633	-1.73567	3.09893	0.885	ns
T Cells	HSPA5+/FURIN+	Diagnosis	COPD	Other-ILD	0.432379	-2.68437	3.54913	0.984	ns
T Cells	HSPA5+/FURIN+	Diagnosis	IPF	Other-ILD	-0.249253	-2.85976	2.36126	0.995	ns
T Cells	NRP1+/FURIN+	Diagnosis	Control	COPD	-0.655486	-2.50756	1.19659	0.796	ns
T Cells	NRP1+/FURIN+	Diagnosis	Control	IPF	-0.768422	-2.127	0.590155	0.461	ns
T Cells	NRP1+/FURIN+	Diagnosis	Control	Other-ILD	-0.863946	-2.83068	1.10279	0.667	ns
T Cells	NRP1+/FURIN+	Diagnosis	COPD	IPF	-0.112936	-1.88622	1.66035	0.998	ns
T Cells	NRP1+/FURIN+	Diagnosis	COPD	Other-ILD	-0.20846	-2.48154	2.06462	0.995	ns
T Cells	NRP1+/FURIN+	Diagnosis	IPF	Other-ILD	-0.0955234	-1.98825	1.7972	0.999	ns
Transitional AT2	ACE2+/CTSL+	Diagnosis	Control	COPD	-0.0272109	-0.0980833	0.0436615	0.751	ns
Transitional AT2	ACE2+/CTSL+	Diagnosis	Control	IPF	-0.0272109	-0.0778239	0.0234021	0.504	ns
Transitional AT2	ACE2+/CTSL+	Diagnosis	Control	Other-ILD	-0.0272109	-0.0958924	0.0414707	0.733	ns
Transitional AT2	ACE2+/CTSL+	Diagnosis	COPD	IPF	-1.83385e-18	-0.0676079	0.0676079	1	ns
Transitional AT2	ACE2+/CTSL+	Diagnosis	COPD	Other-ILD	1.73472e-18	-0.0820141	0.0820141	1	ns
Transitional AT2	ACE2+/CTSL+	Diagnosis	IPF	Other-ILD	3.56857e-18	-0.0653077	0.0653077	1	ns
Transitional AT2	BSG+/CTSL+	Diagnosis	Control	COPD	-6.72717	-14.9202	1.46589	0.148	ns
Transitional AT2	BSG+/CTSL+	Diagnosis	Control	IPF	-5.46629	-11.4177	0.485169	0.0844	ns
Transitional AT2	BSG+/CTSL+	Diagnosis	Control	Other-ILD	0.17508	-8.01798	8.36814	1	ns
Transitional AT2	BSG+/CTSL+	Diagnosis	COPD	IPF	1.26089	-6.67067	9.19245	0.976	ns
Transitional AT2	BSG+/CTSL+	Diagnosis	COPD	Other-ILD	6.90225	-2.82483	16.6293	0.259	ns
Transitional AT2	BSG+/CTSL+	Diagnosis	IPF	Other-ILD	5.64137	-2.29019	13.5729	0.257	ns
Transitional AT2	HSPA5+/CTSL+	Diagnosis	Control	COPD	-2.82568	-9.87369	4.22234	0.727	ns
Transitional AT2	HSPA5+/CTSL+	Diagnosis	Control	IPF	-3.55284	-8.67253	1.56685	0.278	ns
Transitional AT2	HSPA5+/CTSL+	Diagnosis	Control	Other-ILD	3.25526	-3.79275	10.3033	0.63	ns
Transitional AT2	HSPA5+/CTSL+	Diagnosis	COPD	IPF	-0.727161	-7.55022	6.0959	0.993	ns
Transitional AT2	HSPA5+/CTSL+	Diagnosis	COPD	Other-ILD	6.08094	-2.2867	14.4486	0.239	ns
Transitional AT2	HSPA5+/CTSL+	Diagnosis	IPF	Other-ILD	6.8081	-0.0149596	13.6312	0.0507	ns
Transitional AT2	NRP1+/CTSL+	Diagnosis	Control	COPD	-1.45406	-6.90048	3.99236	0.9	ns
Transitional AT2	NRP1+/CTSL+	Diagnosis	Control	IPF	0.755031	-3.21062	4.72068	0.961	ns
Transitional AT2	NRP1+/CTSL+	Diagnosis	Control	Other-ILD	-1.20364	-6.65007	4.24278	0.94	ns
Transitional AT2	NRP1+/CTSL+	Diagnosis	COPD	IPF	2.20909	-3.07052	7.4887	0.7	ns
Transitional AT2	NRP1+/CTSL+	Diagnosis	COPD	Other-ILD	0.250416	-6.21576	6.71659	1	ns
Transitional AT2	NRP1+/CTSL+	Diagnosis	IPF	Other-ILD	-1.95868	-7.23828	3.32093	0.772	ns
Transitional AT2	ACE2+/FURIN+	Diagnosis	Control	COPD	0.0191405	-0.154328	0.192609	0.992	ns
Transitional AT2	ACE2+/FURIN+	Diagnosis	Control	IPF	-0.0618833	-0.186795	0.0630281	0.57	ns
Transitional AT2	ACE2+/FURIN+	Diagnosis	Control	Other-ILD	-0.0774778	-0.240171	0.0852155	0.602	ns
Transitional AT2	ACE2+/FURIN+	Diagnosis	COPD	IPF	-0.0810238	-0.251249	0.0892017	0.602	ns
Transitional AT2	ACE2+/FURIN+	Diagnosis	COPD	Other-ILD	-0.0966184	-0.296225	0.102989	0.589	ns
Transitional AT2	ACE2+/FURIN+	Diagnosis	IPF	Other-ILD	-0.0155945	-0.174826	0.143637	0.994	ns
Transitional AT2	BSG+/FURIN+	Diagnosis	Control	COPD	-1.04343	-6.78971	4.70284	0.966	ns
Transitional AT2	BSG+/FURIN+	Diagnosis	Control	IPF	0.84913	-3.32497	5.02323	0.953	ns
Transitional AT2	BSG+/FURIN+	Diagnosis	Control	Other-ILD	3.27945	-2.46682	9.02572	0.453	ns
Transitional AT2	BSG+/FURIN+	Diagnosis	COPD	IPF	1.89256	-3.6703	7.45543	0.815	ns
Transitional AT2	BSG+/FURIN+	Diagnosis	COPD	Other-ILD	4.32288	-2.49929	11.145	0.358	ns
Transitional AT2	BSG+/FURIN+	Diagnosis	IPF	Other-ILD	2.43032	-3.13255	7.99318	0.671	ns
Transitional AT2	HSPA5+/FURIN+	Diagnosis	Control	COPD	-2.20528	-7.87428	3.46373	0.746	ns
Transitional AT2	HSPA5+/FURIN+	Diagnosis	Control	IPF	-0.846181	-4.97157	3.27921	0.951	ns
Transitional AT2	HSPA5+/FURIN+	Diagnosis	Control	Other-ILD	6.88373	1.21473	12.5527	0.0102	*
Transitional AT2	HSPA5+/FURIN+	Diagnosis	COPD	IPF	1.35909	-4.1179	6.83609	0.918	ns
Transitional AT2	HSPA5+/FURIN+	Diagnosis	COPD	Other-ILD	9.08901	2.37215	15.8059	0.0031	**
Transitional AT2	HSPA5+/FURIN+	Diagnosis	IPF	Other-ILD	7.72991	2.25292	13.2069	0.00182	**
Transitional AT2	NRP1+/FURIN+	Diagnosis	Control	COPD	-0.645168	-1.98523	0.694893	0.598	ns
Transitional AT2	NRP1+/FURIN+	Diagnosis	Control	IPF	0.316957	-0.658768	1.29268	0.835	ns
Transitional AT2	NRP1+/FURIN+	Diagnosis	Control	Other-ILD	-0.444258	-1.78432	0.895802	0.826	ns
Transitional AT2	NRP1+/FURIN+	Diagnosis	COPD	IPF	0.962125	-0.336892	2.26114	0.224	ns
Transitional AT2	NRP1+/FURIN+	Diagnosis	COPD	Other-ILD	0.200909	-1.39006	1.79187	0.988	ns
Transitional AT2	NRP1+/FURIN+	Diagnosis	IPF	Other-ILD	-0.761215	-2.06023	0.537802	0.429	ns
Transitional AT2	ACE2+/TMPRSS2+	Diagnosis	Control	COPD	-0.590289	-2.26176	1.08118	0.794	ns
Transitional AT2	ACE2+/TMPRSS2+	Diagnosis	Control	IPF	-0.383027	-1.5817	0.815647	0.839	ns
Transitional AT2	ACE2+/TMPRSS2+	Diagnosis	Control	Other-ILD	-0.65255	-2.12802	0.822915	0.658	ns
Transitional AT2	ACE2+/TMPRSS2+	Diagnosis	COPD	IPF	0.207262	-1.38023	1.79476	0.986	ns
Transitional AT2	ACE2+/TMPRSS2+	Diagnosis	COPD	Other-ILD	-0.0622614	-1.8679	1.74337	1	ns
Transitional AT2	ACE2+/TMPRSS2+	Diagnosis	IPF	Other-ILD	-0.269523	-1.64913	1.11008	0.957	ns
Transitional AT2	BSG+/TMPRSS2+	Diagnosis	Control	COPD	-3.38394	-16.0178	9.24989	0.9	ns
Transitional AT2	BSG+/TMPRSS2+	Diagnosis	Control	IPF	4.31027	-4.8835	13.504	0.619	ns
Transitional AT2	BSG+/TMPRSS2+	Diagnosis	Control	Other-ILD	17.8193	5.18545	30.4531	0.00184	**
Transitional AT2	BSG+/TMPRSS2+	Diagnosis	COPD	IPF	7.69422	-4.51172	19.9002	0.363	ns
Transitional AT2	BSG+/TMPRSS2+	Diagnosis	COPD	Other-ILD	21.2032	6.23415	36.1723	0.00174	**
Transitional AT2	BSG+/TMPRSS2+	Diagnosis	IPF	Other-ILD	13.509	1.30307	25.7149	0.0235	*
Transitional AT2	NRP1+/TMPRSS2+	Diagnosis	Control	COPD	-4.14668	-11.7297	3.43629	0.491	ns
Transitional AT2	NRP1+/TMPRSS2+	Diagnosis	Control	IPF	1.30304	-4.36125	6.96733	0.933	ns
Transitional AT2	NRP1+/TMPRSS2+	Diagnosis	Control	Other-ILD	-4.3165	-11.8995	3.26647	0.455	ns
Transitional AT2	NRP1+/TMPRSS2+	Diagnosis	COPD	IPF	5.44972	-1.70928	12.6087	0.202	ns
Transitional AT2	NRP1+/TMPRSS2+	Diagnosis	COPD	Other-ILD	-0.169818	-8.92588	8.58624	1	ns
Transitional AT2	NRP1+/TMPRSS2+	Diagnosis	IPF	Other-ILD	-5.61954	-12.7785	1.53946	0.179	ns
TRegs	BSG+/TMPRSS2+	Diagnosis	Control	COPD	-0.0340136	-1.02282	0.954793	1	ns
TRegs	BSG+/TMPRSS2+	Diagnosis	Control	IPF	0.178933	-0.481803	0.839669	0.894	ns
TRegs	BSG+/TMPRSS2+	Diagnosis	Control	Other-ILD	0.0543138	-0.687292	0.795919	0.997	ns
TRegs	BSG+/TMPRSS2+	Diagnosis	COPD	IPF	0.212946	-0.696816	1.12271	0.928	ns
TRegs	BSG+/TMPRSS2+	Diagnosis	COPD	Other-ILD	0.0883274	-0.881762	1.05842	0.995	ns
TRegs	BSG+/TMPRSS2+	Diagnosis	IPF	Other-ILD	-0.124619	-0.757001	0.507763	0.955	ns
Vascular Endothelial Cells	ACE2+/CTSL+	Diagnosis	Control	COPD	-0.065452	-0.341689	0.210785	0.927	ns
Vascular Endothelial Cells	ACE2+/CTSL+	Diagnosis	Control	IPF	-0.0708525	-0.268145	0.12644	0.788	ns
Vascular Endothelial Cells	ACE2+/CTSL+	Diagnosis	Control	Other-ILD	-0.100202	-0.364156	0.163751	0.758	ns
Vascular Endothelial Cells	ACE2+/CTSL+	Diagnosis	COPD	IPF	-0.00540048	-0.267667	0.256866	1	ns
Vascular Endothelial Cells	ACE2+/CTSL+	Diagnosis	COPD	Other-ILD	-0.0347502	-0.350235	0.280735	0.992	ns
Vascular Endothelial Cells	ACE2+/CTSL+	Diagnosis	IPF	Other-ILD	-0.0293497	-0.278645	0.219946	0.99	ns
Vascular Endothelial Cells	BSG+/CTSL+	Diagnosis	Control	COPD	-5.63468	-11.0434	-0.225955	0.0375	*
Vascular Endothelial Cells	BSG+/CTSL+	Diagnosis	Control	IPF	0.811698	-3.16067	4.78407	0.952	ns
Vascular Endothelial Cells	BSG+/CTSL+	Diagnosis	Control	Other-ILD	3.76879	-1.58441	9.12199	0.266	ns
Vascular Endothelial Cells	BSG+/CTSL+	Diagnosis	COPD	IPF	6.44637	1.2352	11.6576	0.00843	**
Vascular Endothelial Cells	BSG+/CTSL+	Diagnosis	COPD	Other-ILD	9.40346	3.07627	15.7307	0.000886	***
Vascular Endothelial Cells	BSG+/CTSL+	Diagnosis	IPF	Other-ILD	2.95709	-2.19644	8.11062	0.448	ns
Vascular Endothelial Cells	HSPA5+/CTSL+	Diagnosis	Control	COPD	-3.6099	-9.34005	2.12025	0.364	ns
Vascular Endothelial Cells	HSPA5+/CTSL+	Diagnosis	Control	IPF	-0.963042	-5.17148	3.2454	0.934	ns
Vascular Endothelial Cells	HSPA5+/CTSL+	Diagnosis	Control	Other-ILD	2.71265	-2.95869	8.38398	0.604	ns
Vascular Endothelial Cells	HSPA5+/CTSL+	Diagnosis	COPD	IPF	2.64686	-2.87401	8.16773	0.602	ns
Vascular Endothelial Cells	HSPA5+/CTSL+	Diagnosis	COPD	Other-ILD	6.32255	-0.380665	13.0258	0.0724	ns
Vascular Endothelial Cells	HSPA5+/CTSL+	Diagnosis	IPF	Other-ILD	3.67569	-1.78411	9.13548	0.304	ns
Vascular Endothelial Cells	NRP1+/CTSL+	Diagnosis	Control	COPD	1.03999	-3.98767	6.06765	0.95	ns
Vascular Endothelial Cells	NRP1+/CTSL+	Diagnosis	Control	IPF	1.52156	-2.17094	5.21407	0.71	ns
Vascular Endothelial Cells	NRP1+/CTSL+	Diagnosis	Control	Other-ILD	3.45433	-1.52172	8.43038	0.278	ns
Vascular Endothelial Cells	NRP1+/CTSL+	Diagnosis	COPD	IPF	0.481572	-4.36246	5.32561	0.994	ns
Vascular Endothelial Cells	NRP1+/CTSL+	Diagnosis	COPD	Other-ILD	2.41434	-3.46709	8.29576	0.713	ns
Vascular Endothelial Cells	NRP1+/CTSL+	Diagnosis	IPF	Other-ILD	1.93276	-2.85768	6.72321	0.724	ns
Vascular Endothelial Cells	ACE2+/FURIN+	Diagnosis	Control	COPD	-0.0935985	-1.24335	1.05615	0.997	ns
Vascular Endothelial Cells	ACE2+/FURIN+	Diagnosis	Control	IPF	-0.485614	-1.32242	0.351193	0.433	ns
Vascular Endothelial Cells	ACE2+/FURIN+	Diagnosis	Control	Other-ILD	-0.50994	-1.58828	0.568397	0.607	ns
Vascular Endothelial Cells	ACE2+/FURIN+	Diagnosis	COPD	IPF	-0.392016	-1.52682	0.742785	0.804	ns
Vascular Endothelial Cells	ACE2+/FURIN+	Diagnosis	COPD	Other-ILD	-0.416341	-1.73934	0.906661	0.845	ns
Vascular Endothelial Cells	ACE2+/FURIN+	Diagnosis	IPF	Other-ILD	-0.0243251	-1.0867	1.03805	1	ns
Vascular Endothelial Cells	BSG+/FURIN+	Diagnosis	Control	COPD	-0.988859	-4.44856	2.47084	0.881	ns
Vascular Endothelial Cells	BSG+/FURIN+	Diagnosis	Control	IPF	-0.164269	-2.70521	2.37667	0.998	ns
Vascular Endothelial Cells	BSG+/FURIN+	Diagnosis	Control	Other-ILD	5.58764	2.16345	9.01183	0.000201	***
Vascular Endothelial Cells	BSG+/FURIN+	Diagnosis	COPD	IPF	0.82459	-2.50875	4.15793	0.919	ns
Vascular Endothelial Cells	BSG+/FURIN+	Diagnosis	COPD	Other-ILD	6.5765	2.52929	10.6237	0.000217	***
Vascular Endothelial Cells	BSG+/FURIN+	Diagnosis	IPF	Other-ILD	5.75191	2.45544	9.04838	5.89e-05	****
Vascular Endothelial Cells	HSPA5+/FURIN+	Diagnosis	Control	COPD	-2.28572	-5.92958	1.35813	0.368	ns
Vascular Endothelial Cells	HSPA5+/FURIN+	Diagnosis	Control	IPF	-0.455073	-3.13595	2.2258	0.972	ns
Vascular Endothelial Cells	HSPA5+/FURIN+	Diagnosis	Control	Other-ILD	5.56464	1.95804	9.17125	0.000505	***
Vascular Endothelial Cells	HSPA5+/FURIN+	Diagnosis	COPD	IPF	1.83065	-1.67289	5.33419	0.531	ns
Vascular Endothelial Cells	HSPA5+/FURIN+	Diagnosis	COPD	Other-ILD	7.85037	3.59651	12.1042	1.87e-05	****
Vascular Endothelial Cells	HSPA5+/FURIN+	Diagnosis	IPF	Other-ILD	6.01972	2.55493	9.4845	6.41e-05	****
Vascular Endothelial Cells	NRP1+/FURIN+	Diagnosis	Control	COPD	-1.05522	-3.60124	1.49079	0.707	ns
Vascular Endothelial Cells	NRP1+/FURIN+	Diagnosis	Control	IPF	1.08803	-0.761896	2.93795	0.426	ns
Vascular Endothelial Cells	NRP1+/FURIN+	Diagnosis	Control	Other-ILD	2.65051	0.131682	5.16934	0.0349	*
Vascular Endothelial Cells	NRP1+/FURIN+	Diagnosis	COPD	IPF	2.14325	-0.311786	4.59829	0.111	ns
Vascular Endothelial Cells	NRP1+/FURIN+	Diagnosis	COPD	Other-ILD	3.70574	0.714166	6.69731	0.00831	**
Vascular Endothelial Cells	NRP1+/FURIN+	Diagnosis	IPF	Other-ILD	1.56248	-0.864351	3.98932	0.344	ns
Venous	BSG+/TMPRSS2+	Diagnosis	Control	COPD	-0.35775	-1.29961	0.58411	0.759	ns
Venous	BSG+/TMPRSS2+	Diagnosis	Control	IPF	-0.447051	-1.11519	0.22109	0.309	ns
Venous	BSG+/TMPRSS2+	Diagnosis	Control	Other-ILD	-0.575615	-1.46448	0.313246	0.338	ns
Venous	BSG+/TMPRSS2+	Diagnosis	COPD	IPF	-0.0893007	-0.984427	0.805826	0.994	ns
Venous	BSG+/TMPRSS2+	Diagnosis	COPD	Other-ILD	-0.217865	-1.28787	0.852141	0.952	ns
Venous	BSG+/TMPRSS2+	Diagnosis	IPF	Other-ILD	-0.128564	-0.967745	0.710617	0.979	ns
Venous	NRP1+/TMPRSS2+	Diagnosis	Control	COPD	-0.610582	-1.7196	0.498438	0.484	ns
Venous	NRP1+/TMPRSS2+	Diagnosis	Control	IPF	-0.341519	-1.15199	0.46895	0.695	ns
Venous	NRP1+/TMPRSS2+	Diagnosis	Control	Other-ILD	-0.610582	-1.66063	0.43947	0.436	ns
Venous	NRP1+/TMPRSS2+	Diagnosis	COPD	IPF	0.269063	-0.758841	1.29697	0.905	ns
Venous	NRP1+/TMPRSS2+	Diagnosis	COPD	Other-ILD	-1.55431e-15	-1.2257	1.2257	1	ns
Venous	NRP1+/TMPRSS2+	Diagnosis	IPF	Other-ILD	-0.269063	-1.23305	0.694924	0.888	ns

## Sheet: Fig2B_entryscore
	CellType	term	group1	group2	estimate	conf.low	conf.high	p.adj	p.adj.signif
1	AT1	Diagnosis	Control	COPD	0.00167477	-0.0193096	0.0226591	0.997	ns
2	AT1	Diagnosis	Control	IPF	0.0420116	0.00946715	0.074556	0.00508	**
3	AT1	Diagnosis	Control	Other-ILD	0.0359578	0.00957085	0.0623448	0.00264	**
4	AT1	Diagnosis	COPD	IPF	0.0403368	0.00769808	0.0729756	0.0082	**
5	AT1	Diagnosis	COPD	Other-ILD	0.034283	0.00777987	0.0607862	0.00496	**
6	AT1	Diagnosis	IPF	Other-ILD	-0.00605378	-0.0424023	0.0302948	0.974	ns
7	AT2	Diagnosis	Control	COPD	0.0513407	0.0446679	0.0580136	0	****
8	AT2	Diagnosis	Control	IPF	0.0355736	0.0306436	0.0405036	0	****
9	AT2	Diagnosis	Control	Other-ILD	0.0626124	0.0581097	0.067115	0	****
10	AT2	Diagnosis	COPD	IPF	-0.0157671	-0.0235394	-0.0079949	1.12e-06	****
11	AT2	Diagnosis	COPD	Other-ILD	0.0112716	0.00376316	0.0187801	0.000664	***
12	AT2	Diagnosis	IPF	Other-ILD	0.0270388	0.0210259	0.0330516	0	****
13	Basal	Diagnosis	Control	COPD	0.0491375	0.022931	0.075344	8.79e-06	****
14	Basal	Diagnosis	Control	IPF	0.0192155	-0.0011322	0.0395633	0.0722	ns
15	Basal	Diagnosis	Control	Other-ILD	0.0415951	0.0199095	0.0632807	5.03e-06	****
16	Basal	Diagnosis	COPD	IPF	-0.0299219	-0.0477252	-0.0121187	9.35e-05	****
17	Basal	Diagnosis	COPD	Other-ILD	-0.00754239	-0.0268605	0.0117757	0.748	ns
18	Basal	Diagnosis	IPF	Other-ILD	0.0223795	0.0123576	0.0324015	5.95e-08	****
19	Ciliated Cells	Diagnosis	Control	COPD	-0.0164317	-0.0241453	-0.0087182	2.65e-07	****
20	Ciliated Cells	Diagnosis	Control	IPF	-0.0203654	-0.0262274	-0.0145033	2.84e-14	****
21	Ciliated Cells	Diagnosis	Control	Other-ILD	0.0219664	0.0145457	0.0293871	1.96e-13	****
22	Ciliated Cells	Diagnosis	COPD	IPF	-0.00393362	-0.00986044	0.00199321	0.321	ns
23	Ciliated Cells	Diagnosis	COPD	Other-ILD	0.0383981	0.0309261	0.0458701	0	****
24	Ciliated Cells	Diagnosis	IPF	Other-ILD	0.0423317	0.0367914	0.0478721	0	****
25	Club Cells	Diagnosis	Control	COPD	0.0439019	0.0263266	0.0614773	4.9e-10	****
26	Club Cells	Diagnosis	Control	IPF	0.0310879	0.0179244	0.0442513	7.66e-09	****
27	Club Cells	Diagnosis	Control	Other-ILD	0.0170121	0.00205476	0.0319695	0.0183	*
28	Club Cells	Diagnosis	COPD	IPF	-0.0128141	-0.0264464	0.000818289	0.0743	ns
29	Club Cells	Diagnosis	COPD	Other-ILD	-0.0268898	-0.0422614	-0.0115182	4.17e-05	****
30	Club Cells	Diagnosis	IPF	Other-ILD	-0.0140758	-0.0241093	-0.00404224	0.00178	**
31	Differentiating Ciliated Cells	Diagnosis	Control	COPD	0.0173479	-0.10891	0.143606	0.985	ns
32	Differentiating Ciliated Cells	Diagnosis	Control	IPF	0.0119573	-0.0519112	0.0758258	0.963	ns
33	Differentiating Ciliated Cells	Diagnosis	Control	Other-ILD	0.0698396	-0.0126543	0.152333	0.129	ns
34	Differentiating Ciliated Cells	Diagnosis	COPD	IPF	-0.00539059	-0.119124	0.108343	0.999	ns
35	Differentiating Ciliated Cells	Diagnosis	COPD	Other-ILD	0.0524917	-0.0726537	0.177637	0.7	ns
36	Differentiating Ciliated Cells	Diagnosis	IPF	Other-ILD	0.0578823	-0.00375795	0.119523	0.0744	ns
37	Goblet Cells	Diagnosis	Control	COPD	0.0213943	0.00589998	0.0368887	0.00221	**
38	Goblet Cells	Diagnosis	Control	IPF	0.0283441	0.0179047	0.0387834	3.39e-08	****
39	Goblet Cells	Diagnosis	Control	Other-ILD	0.0374865	0.0258482	0.0491247	3.39e-08	****
40	Goblet Cells	Diagnosis	COPD	IPF	0.00694976	-0.00537873	0.0192782	0.469	ns
41	Goblet Cells	Diagnosis	COPD	Other-ILD	0.0160921	0.00273324	0.0294511	0.0106	*
42	Goblet Cells	Diagnosis	IPF	Other-ILD	0.00914239	0.00226012	0.0160247	0.0036	**
43	KRT5-/KRT17+	Diagnosis	Control	COPD	-0.0946296	-0.172116	-0.0171433	0.00929	**
44	KRT5-/KRT17+	Diagnosis	Control	IPF	-0.0582559	-0.105681	-0.010831	0.00875	**
45	KRT5-/KRT17+	Diagnosis	Control	Other-ILD	-0.0189945	-0.0699203	0.0319313	0.773	ns
46	KRT5-/KRT17+	Diagnosis	COPD	IPF	0.0363737	-0.0269906	0.099738	0.452	ns
47	KRT5-/KRT17+	Diagnosis	COPD	Other-ILD	0.0756351	0.00960968	0.14166	0.0172	*
48	KRT5-/KRT17+	Diagnosis	IPF	Other-ILD	0.0392614	0.0146778	0.0638449	0.000245	***
49	PNEC/Ionocytes	Diagnosis	Control	COPD	-0.0612747	-0.176727	0.0541775	0.516	ns
50	PNEC/Ionocytes	Diagnosis	Control	IPF	0.0491393	-0.0467743	0.145053	0.546	ns
51	PNEC/Ionocytes	Diagnosis	Control	Other-ILD	0.0318772	-0.110361	0.174116	0.938	ns
52	PNEC/Ionocytes	Diagnosis	COPD	IPF	0.110414	0.0201835	0.200645	0.00952	**
53	PNEC/Ionocytes	Diagnosis	COPD	Other-ILD	0.0931519	-0.0453181	0.231622	0.304	ns
54	PNEC/Ionocytes	Diagnosis	IPF	Other-ILD	-0.0172621	-0.139917	0.105393	0.983	ns
55	Transitional AT2	Diagnosis	Control	COPD	0.00188755	-0.0149261	0.0187012	0.992	ns
56	Transitional AT2	Diagnosis	Control	IPF	0.0061805	-0.00688393	0.0192449	0.617	ns
57	Transitional AT2	Diagnosis	Control	Other-ILD	0.0491472	0.0294968	0.0687976	8.46e-10	****
58	Transitional AT2	Diagnosis	COPD	IPF	0.00429294	-0.013337	0.0219229	0.924	ns
59	Transitional AT2	Diagnosis	COPD	Other-ILD	0.0472597	0.024319	0.0702004	7.45e-07	****
60	Transitional AT2	Diagnosis	IPF	Other-ILD	0.0429667	0.0226134	0.06332	3.62e-07	****

## Sheet: Fig4A_Immune_Cellproportion
	CellType	term	group1	group2	estimate	conf.low	conf.high	p.adj	p.adj.signif
1	B Cells	Diagnosis	Control	COPD	0.014861	0.00570824	0.0240138	0.000226	***
2	B Cells	Diagnosis	Control	IPF	0.0107255	0.00390723	0.0175437	0.000381	***
3	B Cells	Diagnosis	Control	Other-ILD	0.00109923	-0.00992959	0.0121281	0.994	ns
4	B Cells	Diagnosis	COPD	IPF	-0.00413553	-0.0132246	0.00495353	0.641	ns
5	B Cells	Diagnosis	COPD	Other-ILD	-0.0137618	-0.0263219	-0.00120163	0.0255	*
6	B Cells	Diagnosis	IPF	Other-ILD	-0.00962625	-0.0206023	0.00134976	0.108	ns
7	CD4 T Cells	Diagnosis	Control	COPD	0.0333935	0.0169454	0.0498416	2.16e-06	****
8	CD4 T Cells	Diagnosis	Control	IPF	0.00352796	-0.00872487	0.0157808	0.878	ns
9	CD4 T Cells	Diagnosis	Control	Other-ILD	-0.0125784	-0.0323978	0.00724113	0.356	ns
10	CD4 T Cells	Diagnosis	COPD	IPF	-0.0298656	-0.0461992	-0.013532	2.4e-05	****
11	CD4 T Cells	Diagnosis	COPD	Other-ILD	-0.0459719	-0.0685433	-0.0234005	1.99e-06	****
12	CD4 T Cells	Diagnosis	IPF	Other-ILD	-0.0161063	-0.0358309	0.00361826	0.152	ns
13	CD8 T Cells	Diagnosis	Control	COPD	0.0262125	0.00157701	0.050848	0.0321	*
14	CD8 T Cells	Diagnosis	Control	IPF	0.00939711	-0.00895484	0.0277491	0.547	ns
15	CD8 T Cells	Diagnosis	Control	Other-ILD	-0.00547313	-0.0351582	0.024212	0.964	ns
16	CD8 T Cells	Diagnosis	COPD	IPF	-0.0168154	-0.0412794	0.00764862	0.286	ns
17	CD8 T Cells	Diagnosis	COPD	Other-ILD	-0.0316857	-0.0654924	0.00212114	0.0751	ns
18	CD8 T Cells	Diagnosis	IPF	Other-ILD	-0.0148702	-0.0444132	0.0146727	0.562	ns
19	cDCs	Diagnosis	Control	COPD	0.0268406	0.00421915	0.0494621	0.0128	*
20	cDCs	Diagnosis	Control	IPF	0.0327798	0.0159281	0.0496314	6.09e-06	****
21	cDCs	Diagnosis	Control	Other-ILD	0.0705473	0.043289	0.0978055	1.15e-09	****
22	cDCs	Diagnosis	COPD	IPF	0.00593912	-0.0165249	0.0284031	0.903	ns
23	cDCs	Diagnosis	COPD	Other-ILD	0.0437066	0.0126637	0.0747496	0.0019	**
24	cDCs	Diagnosis	IPF	Other-ILD	0.0377675	0.0106398	0.0648952	0.00219	**
25	Macrophages	Diagnosis	Control	COPD	-0.066082	-0.204744	0.0725797	0.606	ns
26	Macrophages	Diagnosis	Control	IPF	0.033547	-0.0697474	0.136841	0.835	ns
27	Macrophages	Diagnosis	Control	Other-ILD	0.067165	-0.0999183	0.234248	0.725	ns
28	Macrophages	Diagnosis	COPD	IPF	0.099629	-0.0380675	0.237325	0.242	ns
29	Macrophages	Diagnosis	COPD	Other-ILD	0.133247	-0.0570354	0.323529	0.27	ns
30	Macrophages	Diagnosis	IPF	Other-ILD	0.033618	-0.132665	0.199901	0.953	ns
31	Mast Cells	Diagnosis	Control	COPD	0.00377281	-0.000368902	0.00791453	0.0883	ns
32	Mast Cells	Diagnosis	Control	IPF	0.00303804	-4.7283e-05	0.00612336	0.0554	ns
33	Mast Cells	Diagnosis	Control	Other-ILD	0.00245394	-0.0025367	0.00744459	0.581	ns
34	Mast Cells	Diagnosis	COPD	IPF	-0.000734771	-0.00484765	0.00337811	0.967	ns
35	Mast Cells	Diagnosis	COPD	Other-ILD	-0.00131887	-0.00700245	0.00436472	0.932	ns
36	Mast Cells	Diagnosis	IPF	Other-ILD	-0.000584096	-0.00555084	0.00438265	0.99	ns
37	Monocytes	Diagnosis	Control	COPD	0.0157161	-0.0153709	0.0468031	0.558	ns
38	Monocytes	Diagnosis	Control	IPF	-0.00434849	-0.0275064	0.0188094	0.962	ns
39	Monocytes	Diagnosis	Control	Other-ILD	0.0392745	0.00181562	0.0767335	0.0358	*
40	Monocytes	Diagnosis	COPD	IPF	-0.0200646	-0.0509352	0.010806	0.335	ns
41	Monocytes	Diagnosis	COPD	Other-ILD	0.0235584	-0.0191016	0.0662185	0.482	ns
42	Monocytes	Diagnosis	IPF	Other-ILD	0.043623	0.0063435	0.0809026	0.0145	*
43	NK Cells	Diagnosis	Control	COPD	0.020741	0.00188458	0.0395974	0.0247	*
44	NK Cells	Diagnosis	Control	IPF	0.00924647	-0.0048004	0.0232933	0.324	ns
45	NK Cells	Diagnosis	Control	Other-ILD	0.00574343	-0.016978	0.0284649	0.914	ns
46	NK Cells	Diagnosis	COPD	IPF	-0.0114945	-0.0302197	0.00723064	0.387	ns
47	NK Cells	Diagnosis	COPD	Other-ILD	-0.0149976	-0.0408738	0.0108787	0.439	ns
48	NK Cells	Diagnosis	IPF	Other-ILD	-0.00350305	-0.0261157	0.0191096	0.978	ns
49	pDCs	Diagnosis	Control	COPD	0.00136966	0.000172334	0.00256699	0.0178	*
50	pDCs	Diagnosis	Control	IPF	0.000645783	-0.000246152	0.00153772	0.242	ns
51	pDCs	Diagnosis	Control	Other-ILD	0.00234199	0.000899247	0.00378474	0.000227	***
52	pDCs	Diagnosis	COPD	IPF	-0.000723878	-0.00191287	0.000465115	0.394	ns
53	pDCs	Diagnosis	COPD	Other-ILD	0.000972331	-0.000670736	0.0026154	0.42	ns
54	pDCs	Diagnosis	IPF	Other-ILD	0.00169621	0.000260373	0.00313204	0.0133	*
55	Plasma Cells	Diagnosis	Control	COPD	0.00378456	0.00112088	0.00644824	0.00168	**
56	Plasma Cells	Diagnosis	Control	IPF	2.91875e-05	-0.00195509	0.00201347	1	ns
57	Plasma Cells	Diagnosis	Control	Other-ILD	0.000909316	-0.00230034	0.00411897	0.883	ns
58	Plasma Cells	Diagnosis	COPD	IPF	-0.00375537	-0.00640051	-0.00111024	0.0017	**
59	Plasma Cells	Diagnosis	COPD	Other-ILD	-0.00287525	-0.00653056	0.000780065	0.178	ns
60	Plasma Cells	Diagnosis	IPF	Other-ILD	0.000880128	-0.00231416	0.00407441	0.892	ns
61	Proliferating Macrophages	Diagnosis	Control	COPD	-0.0017158	-0.00744579	0.00401419	0.865	ns
62	Proliferating Macrophages	Diagnosis	Control	IPF	0.00300199	-0.00126651	0.00727048	0.266	ns
63	Proliferating Macrophages	Diagnosis	Control	Other-ILD	0.0163305	0.009426	0.0232349	2.69e-08	****
64	Proliferating Macrophages	Diagnosis	COPD	IPF	0.00471779	-0.000972316	0.0104079	0.142	ns
65	Proliferating Macrophages	Diagnosis	COPD	Other-ILD	0.0180463	0.0101831	0.0259094	7e-08	****
66	Proliferating Macrophages	Diagnosis	IPF	Other-ILD	0.0133285	0.00645708	0.0201999	6.5e-06	****
67	Proliferating T Cells	Diagnosis	Control	COPD	0.000354732	-0.00164615	0.00235561	0.968	ns
68	Proliferating T Cells	Diagnosis	Control	IPF	0.000118542	-0.00137199	0.00160907	0.997	ns
69	Proliferating T Cells	Diagnosis	Control	Other-ILD	0.000375808	-0.00203519	0.00278681	0.978	ns
70	Proliferating T Cells	Diagnosis	COPD	IPF	-0.00023619	-0.00222314	0.00175076	0.99	ns
71	Proliferating T Cells	Diagnosis	COPD	Other-ILD	2.10759e-05	-0.00272469	0.00276684	1	ns
72	Proliferating T Cells	Diagnosis	IPF	Other-ILD	0.000257266	-0.00214219	0.00265672	0.993	ns
73	TRegs	Diagnosis	Control	COPD	0.000157373	-0.0208745	0.0211892	1	ns
74	TRegs	Diagnosis	Control	IPF	0.0103999	-0.00526751	0.0260674	0.316	ns
75	TRegs	Diagnosis	Control	Other-ILD	0.010549	-0.0147938	0.0358918	0.703	ns
76	TRegs	Diagnosis	COPD	IPF	0.0102426	-0.0106429	0.031128	0.583	ns
77	TRegs	Diagnosis	COPD	Other-ILD	0.0103917	-0.0184699	0.0392532	0.787	ns
78	TRegs	Diagnosis	IPF	Other-ILD	0.000149089	-0.0250723	0.0253705	1	ns

## Sheet: Fig4_IL6score
CellType	term	group1	group2	estimate	conf.low	conf.high	p.adj	p.adj.signif
B Cells	Diagnosis	Control	COPD	-0.0180066	-0.0291405	-0.00687279	0.000192	***
B Cells	Diagnosis	Control	IPF	-0.0115534	-0.0217085	-0.00139834	0.0182	*
B Cells	Diagnosis	Control	Other-ILD	0.131263	0.112691	0.149834	2.5e-12	****
B Cells	Diagnosis	COPD	IPF	0.00645323	-0.0013223	0.0142288	0.143	ns
B Cells	Diagnosis	COPD	Other-ILD	0.149269	0.131884	0.166654	2.5e-12	****
B Cells	Diagnosis	IPF	Other-ILD	0.142816	0.126041	0.159591	2.5e-12	****
CD4 T Cells	Diagnosis	Control	COPD	-0.00119732	-0.0119012	0.00950658	0.992	ns
CD4 T Cells	Diagnosis	Control	IPF	0.0257273	0.0148545	0.0366002	2.49e-08	****
CD4 T Cells	Diagnosis	Control	Other-ILD	-0.0239435	-0.397714	0.349827	0.998	ns
CD4 T Cells	Diagnosis	COPD	IPF	0.0269246	0.0170678	0.0367815	1.76e-08	****
CD4 T Cells	Diagnosis	COPD	Other-ILD	-0.0227462	-0.396488	0.350996	0.999	ns
CD4 T Cells	Diagnosis	IPF	Other-ILD	-0.0496708	-0.423418	0.324076	0.986	ns
CD8 T Cells	Diagnosis	Control	COPD	-0.0283612	-0.0360015	-0.0207209	0	****
CD8 T Cells	Diagnosis	Control	IPF	0.00414554	-0.00275633	0.0110474	0.412	ns
CD8 T Cells	Diagnosis	Control	Other-ILD	0.096526	0.081921	0.111131	0	****
CD8 T Cells	Diagnosis	COPD	IPF	0.0325067	0.0256809	0.0393325	0	****
CD8 T Cells	Diagnosis	COPD	Other-ILD	0.124887	0.110318	0.139456	0	****
CD8 T Cells	Diagnosis	IPF	Other-ILD	0.0923804	0.0781846	0.106576	0	****
cDCs	Diagnosis	Control	COPD	-0.00891327	-0.0171716	-0.00065495	0.0284	*
cDCs	Diagnosis	Control	IPF	-0.0170841	-0.0238407	-0.0103274	4.96e-10	****
cDCs	Diagnosis	Control	Other-ILD	0.0483973	0.0405181	0.0562764	0	****
cDCs	Diagnosis	COPD	IPF	-0.00817079	-0.0148846	-0.00145698	0.00958	**
cDCs	Diagnosis	COPD	Other-ILD	0.0573105	0.0494681	0.065153	0	****
cDCs	Diagnosis	IPF	Other-ILD	0.0654813	0.0592398	0.0717229	0	****
Macrophages	Diagnosis	Control	COPD	-0.0269717	-0.0294238	-0.0245196	0	****
Macrophages	Diagnosis	Control	IPF	-0.00877759	-0.0103992	-0.00715594	0	****
Macrophages	Diagnosis	Control	Other-ILD	0.0231637	0.0206812	0.0256462	0	****
Macrophages	Diagnosis	COPD	IPF	0.0181941	0.0157845	0.0206037	0	****
Macrophages	Diagnosis	COPD	Other-ILD	0.0501354	0.0470794	0.0531914	0	****
Macrophages	Diagnosis	IPF	Other-ILD	0.0319413	0.0295008	0.0343819	0	****
Mast Cells	Diagnosis	Control	COPD	0.0570719	0.0276721	0.0864717	3.8e-06	****
Mast Cells	Diagnosis	Control	IPF	0.0532611	0.0276205	0.0789018	5.96e-07	****
Mast Cells	Diagnosis	Control	Other-ILD	0.139288	0.103324	0.175253	0	****
Mast Cells	Diagnosis	COPD	IPF	-0.00381081	-0.0268256	0.019204	0.974	ns
Mast Cells	Diagnosis	COPD	Other-ILD	0.0822163	0.0480741	0.116358	2.11e-09	****
Mast Cells	Diagnosis	IPF	Other-ILD	0.0860271	0.0550628	0.116991	0	****
Monocytes	Diagnosis	Control	COPD	0.0049619	-0.00259522	0.012519	0.331	ns
Monocytes	Diagnosis	Control	IPF	0.0304713	0.023933	0.0370095	0	****
Monocytes	Diagnosis	Control	Other-ILD	0.123478	0.11561	0.131345	0	****
Monocytes	Diagnosis	COPD	IPF	0.0255094	0.0178495	0.0331692	3.65e-14	****
Monocytes	Diagnosis	COPD	Other-ILD	0.118516	0.109694	0.127337	0	****
Monocytes	Diagnosis	IPF	Other-ILD	0.0930064	0.0850403	0.100973	0	****
NK Cells	Diagnosis	Control	COPD	-0.034161	-0.0426037	-0.0257184	1.19e-08	****
NK Cells	Diagnosis	Control	IPF	0.0200964	0.0124413	0.0277514	1.2e-08	****
NK Cells	Diagnosis	Control	Other-ILD	0.0967105	0.0848182	0.108603	1.19e-08	****
NK Cells	Diagnosis	COPD	IPF	0.0542574	0.0470883	0.0614265	1.19e-08	****
NK Cells	Diagnosis	COPD	Other-ILD	0.130872	0.119286	0.142457	1.19e-08	****
NK Cells	Diagnosis	IPF	Other-ILD	0.0766141	0.0655894	0.0876388	1.19e-08	****
pDCs	Diagnosis	Control	COPD	-0.00553638	-0.0951981	0.0841253	0.999	ns
pDCs	Diagnosis	Control	IPF	0.0131734	-0.0753029	0.10165	0.981	ns
pDCs	Diagnosis	Control	Other-ILD	0.0356732	-0.0538605	0.125207	0.734	ns
pDCs	Diagnosis	COPD	IPF	0.0187098	-0.0206577	0.0580772	0.612	ns
pDCs	Diagnosis	COPD	Other-ILD	0.0412096	-0.000480223	0.0828995	0.054	ns
pDCs	Diagnosis	IPF	Other-ILD	0.0224999	-0.0165753	0.061575	0.448	ns
Plasma Cells	Diagnosis	Control	COPD	0.0139445	-0.0124215	0.0403104	0.525	ns
Plasma Cells	Diagnosis	Control	IPF	-0.00313004	-0.0311544	0.0248943	0.992	ns
Plasma Cells	Diagnosis	Control	Other-ILD	0.0861141	0.0481369	0.124091	3.89e-08	****
Plasma Cells	Diagnosis	COPD	IPF	-0.0170745	-0.0429187	0.00876963	0.325	ns
Plasma Cells	Diagnosis	COPD	Other-ILD	0.0721696	0.0357715	0.108568	2.25e-06	****
Plasma Cells	Diagnosis	IPF	Other-ILD	0.0892441	0.0516273	0.126861	7.71e-09	****
Proliferating Macrophages	Diagnosis	Control	COPD	0.0396746	-0.00173371	0.0810829	0.0661	ns
Proliferating Macrophages	Diagnosis	Control	IPF	-0.00864751	-0.0242267	0.00693167	0.483	ns
Proliferating Macrophages	Diagnosis	Control	Other-ILD	-0.0211325	-0.037258	-0.00500696	0.00425	**
Proliferating Macrophages	Diagnosis	COPD	IPF	-0.0483221	-0.0885169	-0.00812731	0.0109	*
Proliferating Macrophages	Diagnosis	COPD	Other-ILD	-0.0608071	-0.101217	-0.0203974	0.000646	***
Proliferating Macrophages	Diagnosis	IPF	Other-ILD	-0.012485	-0.0251738	0.000203855	0.0557	ns
Proliferating T Cells	Diagnosis	Control	COPD	-0.00545326	-0.0476257	0.0367191	0.987	ns
Proliferating T Cells	Diagnosis	Control	IPF	0.0488637	0.0153821	0.0823452	0.00104	**
Proliferating T Cells	Diagnosis	Control	Other-ILD	0.0967182	0.0467328	0.146704	4.38e-06	****
Proliferating T Cells	Diagnosis	COPD	IPF	0.0543169	0.0130787	0.0955552	0.00404	**
Proliferating T Cells	Diagnosis	COPD	Other-ILD	0.102172	0.0466907	0.157652	1.43e-05	****
Proliferating T Cells	Diagnosis	IPF	Other-ILD	0.0478546	-0.00134523	0.0970544	0.0601	ns
TRegs	Diagnosis	Control	COPD	-0.00631795	-0.0414578	0.0288219	0.967	ns
TRegs	Diagnosis	Control	IPF	0.0808791	0.0598945	0.101864	4.31e-12	****
TRegs	Diagnosis	Control	Other-ILD	0.189977	0.163747	0.216206	4.28e-12	****
TRegs	Diagnosis	COPD	IPF	0.087197	0.0564399	0.117954	6.45e-12	****
TRegs	Diagnosis	COPD	Other-ILD	0.196294	0.161746	0.230843	4.28e-12	****
TRegs	Diagnosis	IPF	Other-ILD	0.109097	0.0891184	0.129076	4.28e-12	****

## Sheet: Fig4_IFNascore
CellType	term	group1	group2	estimate	conf.low	conf.high	p.adj	p.adj.signif
B Cells	Diagnosis	Control	COPD	0.00158402	-0.00439525	0.0075633	0.904	ns
B Cells	Diagnosis	Control	IPF	-0.00482533	-0.010279	0.00062831	0.104	ns
B Cells	Diagnosis	Control	Other-ILD	0.0827637	0.0727901	0.0927373	2.5e-12	****
B Cells	Diagnosis	COPD	IPF	-0.00640935	-0.0105851	-0.00223361	0.000469	***
B Cells	Diagnosis	COPD	Other-ILD	0.0811797	0.0718433	0.090516	2.5e-12	****
B Cells	Diagnosis	IPF	Other-ILD	0.087589	0.0785803	0.0965978	2.5e-12	****
CD4 T Cells	Diagnosis	Control	COPD	-0.00605096	-0.0096198	-0.00248212	7.85e-05	****
CD4 T Cells	Diagnosis	Control	IPF	-0.00306449	-0.00668966	0.000560684	0.131	ns
CD4 T Cells	Diagnosis	Control	Other-ILD	0.0178541	-0.106767	0.142475	0.983	ns
CD4 T Cells	Diagnosis	COPD	IPF	0.00298647	-0.000299941	0.00627289	0.0903	ns
CD4 T Cells	Diagnosis	COPD	Other-ILD	0.0239051	-0.100706	0.148516	0.961	ns
CD4 T Cells	Diagnosis	IPF	Other-ILD	0.0209186	-0.103694	0.145532	0.973	ns
CD8 T Cells	Diagnosis	Control	COPD	-0.00877803	-0.012479	-0.00507706	0	****
CD8 T Cells	Diagnosis	Control	IPF	-0.00604485	-0.00938814	-0.00270156	2.02e-05	****
CD8 T Cells	Diagnosis	Control	Other-ILD	0.0334389	0.0263642	0.0405135	0	****
CD8 T Cells	Diagnosis	COPD	IPF	0.00273318	-0.000573267	0.00603963	0.146	ns
CD8 T Cells	Diagnosis	COPD	Other-ILD	0.0422169	0.0351596	0.0492742	0	****
CD8 T Cells	Diagnosis	IPF	Other-ILD	0.0394837	0.0326072	0.0463602	0	****
cDCs	Diagnosis	Control	COPD	-0.00974057	-0.0164168	-0.00306433	0.00102	**
cDCs	Diagnosis	Control	IPF	-0.0137461	-0.0192083	-0.00828383	6.07e-10	****
cDCs	Diagnosis	Control	Other-ILD	0.00946901	0.00309927	0.0158387	0.000773	***
cDCs	Diagnosis	COPD	IPF	-0.00400551	-0.00943314	0.00142211	0.23	ns
cDCs	Diagnosis	COPD	Other-ILD	0.0192096	0.0128695	0.0255496	6.55e-14	****
cDCs	Diagnosis	IPF	Other-ILD	0.0232151	0.0181693	0.0282609	0	****
Macrophages	Diagnosis	Control	COPD	0.0273157	0.0249131	0.0297183	0	****
Macrophages	Diagnosis	Control	IPF	-0.00912973	-0.0107186	-0.00754081	0	****
Macrophages	Diagnosis	Control	Other-ILD	0.0266005	0.0241681	0.0290329	0	****
Macrophages	Diagnosis	COPD	IPF	-0.0364455	-0.0388064	-0.0340845	0	****
Macrophages	Diagnosis	COPD	Other-ILD	-0.000715225	-0.00370956	0.00227911	0.928	ns
Macrophages	Diagnosis	IPF	Other-ILD	0.0357302	0.033339	0.0381215	0	****
Mast Cells	Diagnosis	Control	COPD	-0.0083814	-0.0215621	0.00479934	0.359	ns
Mast Cells	Diagnosis	Control	IPF	-0.00177147	-0.0132669	0.00972395	0.979	ns
Mast Cells	Diagnosis	Control	Other-ILD	-0.00726047	-0.0233844	0.00886344	0.654	ns
Mast Cells	Diagnosis	COPD	IPF	0.00660993	-0.00370826	0.0169281	0.353	ns
Mast Cells	Diagnosis	COPD	Other-ILD	0.00112093	-0.014186	0.0164278	0.998	ns
Mast Cells	Diagnosis	IPF	Other-ILD	-0.005489	-0.0193711	0.00839314	0.74	ns
Monocytes	Diagnosis	Control	COPD	0.0429325	0.0373266	0.0485384	0	****
Monocytes	Diagnosis	Control	IPF	0.0280264	0.0231763	0.0328765	0	****
Monocytes	Diagnosis	Control	Other-ILD	0.0452913	0.0394553	0.0511273	0	****
Monocytes	Diagnosis	COPD	IPF	-0.0149061	-0.0205882	-0.00922399	9.54e-11	****
Monocytes	Diagnosis	COPD	Other-ILD	0.00235883	-0.00418505	0.00890271	0.791	ns
Monocytes	Diagnosis	IPF	Other-ILD	0.0172649	0.0113556	0.0231742	3.92e-13	****
NK Cells	Diagnosis	Control	COPD	-0.00271857	-0.00715467	0.00171753	0.393	ns
NK Cells	Diagnosis	Control	IPF	0.0105417	0.00651942	0.014564	1.2e-08	****
NK Cells	Diagnosis	Control	Other-ILD	0.0576488	0.0514001	0.0638975	1.19e-08	****
NK Cells	Diagnosis	COPD	IPF	0.0132603	0.00949336	0.0170272	1.19e-08	****
NK Cells	Diagnosis	COPD	Other-ILD	0.0603674	0.0542799	0.0664548	1.19e-08	****
NK Cells	Diagnosis	IPF	Other-ILD	0.0471071	0.0413143	0.0528999	1.19e-08	****
pDCs	Diagnosis	Control	COPD	0.0647569	-0.00373288	0.133247	0.0716	ns
pDCs	Diagnosis	Control	IPF	-0.0135538	-0.081138	0.0540305	0.955	ns
pDCs	Diagnosis	Control	Other-ILD	0.0263259	-0.0420661	0.0947179	0.754	ns
pDCs	Diagnosis	COPD	IPF	-0.0783107	-0.108382	-0.0482391	0	****
pDCs	Diagnosis	COPD	Other-ILD	-0.038431	-0.0702765	-0.00658542	0.0106	*
pDCs	Diagnosis	IPF	Other-ILD	0.0398797	0.0100314	0.069728	0.00344	**
Plasma Cells	Diagnosis	Control	COPD	0.0159656	0.00455164	0.0273797	0.00188	**
Plasma Cells	Diagnosis	Control	IPF	0.0269791	0.0148472	0.0391111	7.49e-08	****
Plasma Cells	Diagnosis	Control	Other-ILD	0.054408	0.0379674	0.0708486	2.34e-11	****
Plasma Cells	Diagnosis	COPD	IPF	0.0110135	-0.000174629	0.0222016	0.0556	ns
Plasma Cells	Diagnosis	COPD	Other-ILD	0.0384423	0.0226853	0.0541993	2.65e-09	****
Plasma Cells	Diagnosis	IPF	Other-ILD	0.0274288	0.0111442	0.0437134	9.2e-05	****
Proliferating Macrophages	Diagnosis	Control	COPD	0.032613	-0.0112531	0.0764792	0.224	ns
Proliferating Macrophages	Diagnosis	Control	IPF	0.0212653	0.00476142	0.0377693	0.00518	**
Proliferating Macrophages	Diagnosis	Control	Other-ILD	0.00556865	-0.011514	0.0226513	0.836	ns
Proliferating Macrophages	Diagnosis	COPD	IPF	-0.0113477	-0.0539283	0.0312329	0.903	ns
Proliferating Macrophages	Diagnosis	COPD	Other-ILD	-0.0270444	-0.0698527	0.0157639	0.365	ns
Proliferating Macrophages	Diagnosis	IPF	Other-ILD	-0.0156967	-0.0291387	-0.0022547	0.0144	*
Proliferating T Cells	Diagnosis	Control	COPD	-0.0294908	-0.0483072	-0.0106743	0.000342	***
Proliferating T Cells	Diagnosis	Control	IPF	-0.00155513	-0.0164939	0.0133836	0.993	ns
Proliferating T Cells	Diagnosis	Control	Other-ILD	0.00787671	-0.0144257	0.0301791	0.8	ns
Proliferating T Cells	Diagnosis	COPD	IPF	0.0279356	0.00953601	0.0463353	0.000573	***
Proliferating T Cells	Diagnosis	COPD	Other-ILD	0.0373675	0.0126131	0.0621218	0.000627	***
Proliferating T Cells	Diagnosis	IPF	Other-ILD	0.00943184	-0.0125201	0.0313838	0.686	ns
TRegs	Diagnosis	Control	COPD	0.0466679	0.0319745	0.0613612	4.33e-12	****
TRegs	Diagnosis	Control	IPF	0.00744927	-0.00132519	0.0162237	0.128	ns
TRegs	Diagnosis	Control	Other-ILD	0.034706	0.0237386	0.0456735	4.33e-12	****
TRegs	Diagnosis	COPD	IPF	-0.0392186	-0.0520793	-0.0263579	4.35e-12	****
TRegs	Diagnosis	COPD	Other-ILD	-0.0119618	-0.026408	0.00248437	0.144	ns
TRegs	Diagnosis	IPF	Other-ILD	0.0272568	0.0189028	0.0356108	4.32e-12	****

## Sheet: FIg4_HLAscore
CellType	term	group1	group2	estimate	conf.low	conf.high	p.adj	p.adj.signif
B Cells	Diagnosis	Control	COPD	-0.0518195	-0.0906953	-0.0129437	0.00346	**
B Cells	Diagnosis	Control	IPF	0.122506	0.0870473	0.157964	2.53e-12	****
B Cells	Diagnosis	Control	Other-ILD	0.552506	0.48766	0.617352	2.5e-12	****
B Cells	Diagnosis	COPD	IPF	0.174325	0.147175	0.201475	2.5e-12	****
B Cells	Diagnosis	COPD	Other-ILD	0.604326	0.543623	0.665029	2.5e-12	****
B Cells	Diagnosis	IPF	Other-ILD	0.430001	0.371428	0.488574	2.5e-12	****
CD4 T Cells	Diagnosis	Control	COPD	-0.0126544	-0.0257189	0.000410103	0.0617	ns
CD4 T Cells	Diagnosis	Control	IPF	0.0306961	0.0174254	0.0439667	3.47e-08	****
CD4 T Cells	Diagnosis	Control	Other-ILD	0.710907	0.254707	1.16711	0.000365	***
CD4 T Cells	Diagnosis	COPD	IPF	0.0433504	0.0313198	0.055381	1.75e-08	****
CD4 T Cells	Diagnosis	COPD	Other-ILD	0.723561	0.267396	1.17973	0.00027	***
CD4 T Cells	Diagnosis	IPF	Other-ILD	0.680211	0.22404	1.13638	0.000739	***
CD8 T Cells	Diagnosis	Control	COPD	-0.0688377	-0.0817539	-0.0559215	0	****
CD8 T Cells	Diagnosis	Control	IPF	0.0334298	0.021762	0.0450977	0	****
CD8 T Cells	Diagnosis	Control	Other-ILD	0.137632	0.112942	0.162322	0	****
CD8 T Cells	Diagnosis	COPD	IPF	0.102268	0.0907282	0.113807	0	****
CD8 T Cells	Diagnosis	COPD	Other-ILD	0.206469	0.18184	0.231099	0	****
CD8 T Cells	Diagnosis	IPF	Other-ILD	0.104202	0.0802033	0.128201	0	****
cDCs	Diagnosis	Control	COPD	0.270726	0.239638	0.301814	0	****
cDCs	Diagnosis	Control	IPF	0.323249	0.297814	0.348684	0	****
cDCs	Diagnosis	Control	Other-ILD	0.701134	0.671474	0.730795	0	****
cDCs	Diagnosis	COPD	IPF	0.0525228	0.0272491	0.0777965	5.6e-07	****
cDCs	Diagnosis	COPD	Other-ILD	0.430408	0.400886	0.459931	0	****
cDCs	Diagnosis	IPF	Other-ILD	0.377885	0.354389	0.401381	0	****
Macrophages	Diagnosis	Control	COPD	0.0459704	0.0367571	0.0551836	0	****
Macrophages	Diagnosis	Control	IPF	-0.045323	-0.051416	-0.03923	0	****
Macrophages	Diagnosis	Control	Other-ILD	0.347058	0.337731	0.356386	0	****
Macrophages	Diagnosis	COPD	IPF	-0.0912934	-0.100347	-0.0822398	0	****
Macrophages	Diagnosis	COPD	Other-ILD	0.301088	0.289606	0.31257	0	****
Macrophages	Diagnosis	IPF	Other-ILD	0.392381	0.383211	0.401551	0	****
Mast Cells	Diagnosis	Control	COPD	-0.0546967	-0.115129	0.00573597	0.0923	ns
Mast Cells	Diagnosis	Control	IPF	-0.10992	-0.162625	-0.057214	5.3e-07	****
Mast Cells	Diagnosis	Control	Other-ILD	0.105143	0.0312157	0.179069	0.00149	**
Mast Cells	Diagnosis	COPD	IPF	-0.0552229	-0.102531	-0.00791474	0.0144	*
Mast Cells	Diagnosis	COPD	Other-ILD	0.159839	0.0896584	0.23002	2.97e-08	****
Mast Cells	Diagnosis	IPF	Other-ILD	0.215062	0.151414	0.278711	0	****
Monocytes	Diagnosis	Control	COPD	0.157826	0.138306	0.177345	0	****
Monocytes	Diagnosis	Control	IPF	0.28293	0.266043	0.299818	0	****
Monocytes	Diagnosis	Control	Other-ILD	0.396659	0.376339	0.41698	0	****
Monocytes	Diagnosis	COPD	IPF	0.125105	0.10532	0.144889	0	****
Monocytes	Diagnosis	COPD	Other-ILD	0.238834	0.216049	0.261619	0	****
Monocytes	Diagnosis	IPF	Other-ILD	0.113729	0.0931534	0.134305	0	****
NK Cells	Diagnosis	Control	COPD	-0.0571151	-0.07006	-0.0441701	1.19e-08	****
NK Cells	Diagnosis	Control	IPF	0.0245437	0.0128063	0.0362811	4.83e-07	****
NK Cells	Diagnosis	Control	Other-ILD	0.0747421	0.0565079	0.0929763	1.19e-08	****
NK Cells	Diagnosis	COPD	IPF	0.0816588	0.0706666	0.092651	1.19e-08	****
NK Cells	Diagnosis	COPD	Other-ILD	0.131857	0.114094	0.149621	1.19e-08	****
NK Cells	Diagnosis	IPF	Other-ILD	0.0501984	0.0332944	0.0671023	1.19e-08	****
pDCs	Diagnosis	Control	COPD	-0.0557366	-0.244805	0.133332	0.873	ns
pDCs	Diagnosis	Control	IPF	-0.0635181	-0.250087	0.12305	0.817	ns
pDCs	Diagnosis	Control	Other-ILD	-0.187238	-0.376037	0.00155987	0.0529	ns
pDCs	Diagnosis	COPD	IPF	-0.0077815	-0.0907951	0.0752321	0.995	ns
pDCs	Diagnosis	COPD	Other-ILD	-0.131502	-0.219413	-0.0435912	0.000739	***
pDCs	Diagnosis	IPF	Other-ILD	-0.12372	-0.206118	-0.0413232	0.000698	***
Plasma Cells	Diagnosis	Control	COPD	-0.00419558	-0.0561813	0.0477901	0.997	ns
Plasma Cells	Diagnosis	Control	IPF	0.109016	0.0537609	0.164272	2.57e-06	****
Plasma Cells	Diagnosis	Control	Other-ILD	0.0646567	-0.0102229	0.139536	0.118	ns
Plasma Cells	Diagnosis	COPD	IPF	0.113212	0.0622551	0.164169	7.73e-08	****
Plasma Cells	Diagnosis	COPD	Other-ILD	0.0688523	-0.00291394	0.140618	0.0655	ns
Plasma Cells	Diagnosis	IPF	Other-ILD	-0.0443597	-0.118529	0.0298093	0.415	ns
Proliferating Macrophages	Diagnosis	Control	COPD	0.696862	0.535003	0.858722	3.58e-08	****
Proliferating Macrophages	Diagnosis	Control	IPF	0.2433	0.182403	0.304197	3.58e-08	****
Proliferating Macrophages	Diagnosis	Control	Other-ILD	0.190642	0.12761	0.253675	3.58e-08	****
Proliferating Macrophages	Diagnosis	COPD	IPF	-0.453563	-0.610679	-0.296447	3.58e-08	****
Proliferating Macrophages	Diagnosis	COPD	Other-ILD	-0.50622	-0.664176	-0.348264	3.58e-08	****
Proliferating Macrophages	Diagnosis	IPF	Other-ILD	-0.0526573	-0.102256	-0.00305841	0.0324	*
Proliferating T Cells	Diagnosis	Control	COPD	0.00235071	-0.0884927	0.0931941	1	ns
Proliferating T Cells	Diagnosis	Control	IPF	0.0951528	0.0230303	0.167275	0.00396	**
Proliferating T Cells	Diagnosis	Control	Other-ILD	0.13195	0.0242766	0.239623	0.00898	**
Proliferating T Cells	Diagnosis	COPD	IPF	0.0928021	0.00397093	0.181633	0.0366	*
Proliferating T Cells	Diagnosis	COPD	Other-ILD	0.129599	0.0100883	0.24911	0.0274	*
Proliferating T Cells	Diagnosis	IPF	Other-ILD	0.0367972	-0.0691839	0.142778	0.808	ns
TRegs	Diagnosis	Control	COPD	0.134081	0.0831358	0.185026	9.2e-11	****
TRegs	Diagnosis	Control	IPF	0.0570899	0.0266668	0.087513	8.64e-06	****
TRegs	Diagnosis	Control	Other-ILD	-0.000332308	-0.038359	0.0376944	1	ns
TRegs	Diagnosis	COPD	IPF	-0.0769911	-0.121582	-0.0323999	5.48e-05	****
TRegs	Diagnosis	COPD	Other-ILD	-0.134413	-0.184502	-0.084325	3.93e-11	****
TRegs	Diagnosis	IPF	Other-ILD	-0.0574222	-0.0863875	-0.0284569	2.15e-06	****

## Sheet: FigS5B_entryscore
	CellType	term	group1	group2	estimate	conf.low	conf.high	p.adj	p.adj.signif
1	AT1	Diagnosis	Control	COPD	0.0149367	-0.00668013	0.0365535	0.285	ns
2	AT1	Diagnosis	Control	IPF	0.054818	0.0212926	0.0883434	0.00016	***
3	AT1	Diagnosis	Control	Other-ILD	0.0543577	0.0271754	0.08154	1.78e-06	****
4	AT1	Diagnosis	COPD	IPF	0.0398813	0.00625878	0.0735039	0.0124	*
5	AT1	Diagnosis	COPD	Other-ILD	0.039421	0.012119	0.066723	0.00121	**
6	AT1	Diagnosis	IPF	Other-ILD	-0.000460311	-0.0379045	0.0369839	1	ns
7	AT2	Diagnosis	Control	COPD	0.04377	0.0368953	0.0506446	0	****
8	AT2	Diagnosis	Control	IPF	0.0148502	0.00977113	0.0199293	3.77e-13	****
9	AT2	Diagnosis	Control	Other-ILD	0.0350029	0.030364	0.0396417	0	****
10	AT2	Diagnosis	COPD	IPF	-0.0289197	-0.036927	-0.0209125	4.23e-14	****
11	AT2	Diagnosis	COPD	Other-ILD	-0.0087671	-0.0165026	-0.00103157	0.0189	*
12	AT2	Diagnosis	IPF	Other-ILD	0.0201526	0.0139579	0.0263474	4.2e-14	****
13	Basal	Diagnosis	Control	COPD	-0.00214489	-0.0267538	0.0224641	0.996	ns
14	Basal	Diagnosis	Control	IPF	-0.0180399	-0.0371472	0.00106743	0.0723	ns
15	Basal	Diagnosis	Control	Other-ILD	-0.0127376	-0.0331013	0.00762599	0.374	ns
16	Basal	Diagnosis	COPD	IPF	-0.015895	-0.032613	0.000822945	0.0693	ns
17	Basal	Diagnosis	COPD	Other-ILD	-0.0105928	-0.0287333	0.00754774	0.437	ns
18	Basal	Diagnosis	IPF	Other-ILD	0.00530225	-0.00410877	0.0147133	0.47	ns
19	Ciliated Cells	Diagnosis	Control	COPD	-0.00843858	-0.0156492	-0.00122798	0.0141	*
20	Ciliated Cells	Diagnosis	Control	IPF	0.00228939	-0.00319042	0.0077692	0.706	ns
21	Ciliated Cells	Diagnosis	Control	Other-ILD	0.0184765	0.0115396	0.0254134	4.67e-11	****
22	Ciliated Cells	Diagnosis	COPD	IPF	0.010728	0.00518758	0.0162684	3.9e-06	****
23	Ciliated Cells	Diagnosis	COPD	Other-ILD	0.0269151	0.0199303	0.0338999	3.66e-14	****
24	Ciliated Cells	Diagnosis	IPF	Other-ILD	0.0161871	0.011008	0.0213662	5.78e-14	****
25	Club Cells	Diagnosis	Control	COPD	0.0191754	0.0029255	0.0354253	0.013	*
26	Club Cells	Diagnosis	Control	IPF	0.011475	-0.000695795	0.0236457	0.0729	ns
27	Club Cells	Diagnosis	Control	Other-ILD	0.00989032	-0.00393905	0.0237197	0.256	ns
28	Club Cells	Diagnosis	COPD	IPF	-0.00770044	-0.0203047	0.00490385	0.396	ns
29	Club Cells	Diagnosis	COPD	Other-ILD	-0.00928509	-0.0234975	0.0049273	0.335	ns
30	Club Cells	Diagnosis	IPF	Other-ILD	-0.00158465	-0.0108615	0.0076922	0.972	ns
31	Differentiating Ciliated Cells	Diagnosis	Control	COPD	0.0439668	-0.0776141	0.165548	0.787	ns
32	Differentiating Ciliated Cells	Diagnosis	Control	IPF	0.0194527	-0.0420499	0.0809554	0.846	ns
33	Differentiating Ciliated Cells	Diagnosis	Control	Other-ILD	0.0723894	-0.00704863	0.151827	0.0884	ns
34	Differentiating Ciliated Cells	Diagnosis	COPD	IPF	-0.024514	-0.134035	0.0850065	0.939	ns
35	Differentiating Ciliated Cells	Diagnosis	COPD	Other-ILD	0.0284227	-0.092087	0.148932	0.929	ns
36	Differentiating Ciliated Cells	Diagnosis	IPF	Other-ILD	0.0529367	-0.00642021	0.112294	0.0994	ns
37	Goblet Cells	Diagnosis	Control	COPD	0.00398688	-0.00942514	0.0173989	0.871	ns
38	Goblet Cells	Diagnosis	Control	IPF	-0.00128086	-0.0103172	0.00775552	0.983	ns
39	Goblet Cells	Diagnosis	Control	Other-ILD	0.00682423	-0.00324993	0.0168984	0.303	ns
40	Goblet Cells	Diagnosis	COPD	IPF	-0.00526774	-0.0159394	0.00540389	0.583	ns
41	Goblet Cells	Diagnosis	COPD	Other-ILD	0.00283734	-0.00872622	0.0144009	0.922	ns
42	Goblet Cells	Diagnosis	IPF	Other-ILD	0.00810509	0.00214774	0.0140624	0.00267	**
43	KRT5-/KRT17+	Diagnosis	Control	COPD	0.0192396	-0.0668699	0.105349	0.94	ns
44	KRT5-/KRT17+	Diagnosis	Control	IPF	0.0383361	-0.0143666	0.0910387	0.241	ns
45	KRT5-/KRT17+	Diagnosis	Control	Other-ILD	0.0276472	-0.028946	0.0842404	0.591	ns
46	KRT5-/KRT17+	Diagnosis	COPD	IPF	0.0190965	-0.0513194	0.0895124	0.898	ns
47	KRT5-/KRT17+	Diagnosis	COPD	Other-ILD	0.00840765	-0.0649655	0.0817808	0.991	ns
48	KRT5-/KRT17+	Diagnosis	IPF	Other-ILD	-0.0106889	-0.0380082	0.0166305	0.746	ns
49	PNEC/Ionocytes	Diagnosis	Control	COPD	-0.0361556	-0.130021	0.0577101	0.75	ns
50	PNEC/Ionocytes	Diagnosis	Control	IPF	-0.026644	-0.104624	0.0513364	0.812	ns
51	PNEC/Ionocytes	Diagnosis	Control	Other-ILD	-0.00528887	-0.120933	0.110355	0.999	ns
52	PNEC/Ionocytes	Diagnosis	COPD	IPF	0.00951161	-0.0638482	0.0828714	0.987	ns
53	PNEC/Ionocytes	Diagnosis	COPD	Other-ILD	0.0308667	-0.0817131	0.143447	0.893	ns
54	PNEC/Ionocytes	Diagnosis	IPF	Other-ILD	0.0213551	-0.0783664	0.121077	0.945	ns
55	Transitional AT2	Diagnosis	Control	COPD	0.0340737	0.0151531	0.0529943	2.24e-05	****
56	Transitional AT2	Diagnosis	Control	IPF	0.0182164	0.00351478	0.032918	0.00796	**
57	Transitional AT2	Diagnosis	Control	Other-ILD	0.0238748	0.00176189	0.0459878	0.0284	*
58	Transitional AT2	Diagnosis	COPD	IPF	-0.0158573	-0.0356966	0.00398197	0.169	ns
59	Transitional AT2	Diagnosis	COPD	Other-ILD	-0.0101989	-0.0360144	0.0156167	0.741	ns
60	Transitional AT2	Diagnosis	IPF	Other-ILD	0.00565844	-0.0172455	0.0285623	0.921	ns
